1 **A Rice Dual-localized Pentatricopeptide Repeat Protein is involved in Organellar**  
2 **RNA Editing with MORFs**

3

4 **Running Title** : A dual-localization PPR functions on RNA editing with MORFs

5

6 Haijun Xiao, Yanghong Xu, Chenzi Ni, Qiannan Zhang, Feiya Zhong, Jishuai Huang, Yingguo  
7 Zhu, and Jun Hu \*

8

9 \* Corresponding author: junhu@whu.edu.cn

10

11 State Key Laboratory of Hybrid Rice; Engineering Research Center for Plant Biotechnology and  
12 Germplasm Utilization of Ministry of Education; College of Life Sciences, Wuhan University,  
13 Wuhan 430072, China.

14

15 **Highlight**

16 We firstly characterized a dual-localized PPR protein which is required for RNA  
17 editing in mitochondrion and chloroplast simultaneously. OsPGL1 binds to two  
18 distinguish target transcripts directly and cooperated with MORFs.

19

20 **Abstract**

21 Flowering plants engage in diverse RNA editing events in mitochondrion and  
22 chloroplast on post-transcriptional process. Although several PPRs and MORFs were

23 identified as RNA editing factors, the underlying mechanism of PPRs and the  
24 cooperation among them are still obscure. Here, we identified a rice dual-localized  
25 PPR mutant *Ospgl1*. Loss-of-function of *OsPGL1* resulted in defect of chloroplast  
26 RNA editing at *ndhD-878* and mitochondrial RNA editing at *ccmFc-543*, which can  
27 be restored via complementary validation. Despite the synonymous editing on  
28 *ccmFc-543*, loss of editing at *ndhD-878* caused failure of conversion from serine to  
29 leucine, leading to the dysfunction of chloroplast and defective in photosynthetic  
30 complex, further studies demonstrated OsPGL1 directly bound to both two transcripts.  
31 The interaction between three MORFs (MORF2/8/9) and OsPGL1 were confirmed *in*  
32 *vitro* and *in vivo*, implied OsPGL1 functioned on RNA editing via an editosome. It  
33 also suggested MORFs assisted and contributed to the flexible PPR-RNA recognition  
34 model during RNA editing through the cooperation with PPRs. These results provide  
35 new insight into the relationship between RNA editing and plant development on  
36 chloroplast.

37

38 **Key words:** RNA editing, PPR, Chloroplast, Mitochondrial, MORF, Dual-localized

39

## 40 **Introduction**

41 RNA editing was broadly defined as a post-transcriptional process that changes the  
42 sequence of an RNA molecule from that of its DNA master (Covello and Gray, 1989).  
43 RNA editing is widely spread in eukaryotic cell and highlighted in plant mitochondria  
44 and chloroplasts. In animals, RNA editing was mediated by two mechanisms, one is  
45 C-to-U editing by apolipoprotein B mRNA editing enzyme, catalytic (APOBEC) and  
46 another is adenosine (A)-to-inosine (I) editing by adenosine deaminase acting on  
47 RNA (ADAR) (Kim *et al.*, 1994; Mehta and Driscoll, 2002; Melcher *et al.*, 1996;

48 Teng *et al.*, 1993). In plants, RNA editing includes C-to-U, U-to-C and A-to-I  
49 conversion (Takenaka *et al.*, 2013b). The majority of editing in plants occurs in  
50 mitochondrial and plastid transcripts, however, A-to-I editing also occurs in cytosolic  
51 tRNAs (Chateigner-Boutin and Small, 2010). RNA editing from C-to-U is the most  
52 frequent editing events in plants, in Arabidopsis and rice, 525 and 491 C-to-U editing  
53 sites in mitochondria, 34 and 21 C-to-U editing sites in chloroplast has been identified  
54 in previous study (Chateigner-Boutin and Small, 2010). In human, the APOBEC3  
55 proteins can deaminate cytidines to uridines in single-stranded DNA (ssDNA)  
56 (McDougall *et al.*, 2011). Recently, the fusion of APOBEC3 with catalytically dead  
57 Cas9 (dCas9) or other Cas9 variants in CRISPR system accomplished the genomic  
58 editing of single bases in mammalian, yeasts and plants (Hess *et al.*, 2016; Kim *et al.*,  
59 2017; Lu and Zhu, 2017; Ma *et al.*, 2016; Zong *et al.*, 2017). While in plants, the  
60 deaminase activity still need to be confirmed and elucidated. Researchers proposed  
61 RNA editing activity is governed by RNA-binding pentatricopeptide repeat (PPR)  
62 proteins, and DYW-subclass PPR proteins were considered as mainly RNA editing  
63 factors depend on its similarity with cytidine deaminases of the DYW motif (Salone  
64 *et al.*, 2007)

65 To date, several non-PPR editing factors, such as RNA editing factor interacting  
66 proteins (RIPs)/multiple organellar RNA editing factors (MORFs), organelle RNA  
67 recognition motif (ORRM) proteins, organelle zinc-finger (OZ) proteins, and  
68 protoporphyrinogen oxidase 1 (PPO1) have been identified as components of the  
69 plant RNA apparatus (Sun *et al.*, 2016). There were nine MORF proteins in  
70 Arabidopsis and five members in rice. MORF8/RIP1 was identified as an interacting  
71 factor of RARE1, a PPR protein required for RNA editing in Arabidopsis chloroplast  
72 (Bentolila *et al.*, 2012). MORF2 and MORF9 were both targeted exclusively in  
73 plastids and can affect most of RNA editing sites in chloroplast in Arabidopsis  
74 (Takenaka *et al.*, 2012). MORF2/8/9 can interact with ORRM6, which is involved in

75 RNA editing of psbF-C77 and accD-C794 in Arabidopsis (Hackett *et al.*, 2017).  
76 Furthermore, MORFs also interact with each other and form a heterodimeric or  
77 homodimeric complex, suggesting a more complicated regulation mechanism in  
78 plants (Takenaka *et al.*, 2012).

79 The PPR protein family was characterized by the degenerate motifs of 35 amino  
80 acids arranged as tandem repeats of 2–25 such elements, settled in a pair of  
81 antiparallel double alpha-helices, helices A and B (Small and Peeters, 2000; Yin *et al.*,  
82 2013). PPR proteins have been found to be in eukaryotic genomes and greatly  
83 expanded in the plants, study showed more than 400 members harbored into land  
84 plants (Cheng *et al.*, 2016). PPR protein can be divided into two sub-families: P and  
85 PLS subfamilies, the P sub-families proteins contain tandem arrays of canonical  
86 35-amino-acid (P) PPR repeats, whereas PLS sub-families characterized by triplets of  
87 P, L (i.e.35 to 36 amino acids in length), and S (i.e.31 amino acids) motifs (Lurin *et al.*,  
88 2004). Many post-transcriptional processes in these organelles were relevant to PPR  
89 proteins, including RNA editing, splicing, cleavage, RNA stability, and translation  
90 (Schmitz-Linneweber and Small, 2008). Most PPR proteins are targeted either  
91 mitochondria or chloroplasts, but few of them are dual-localization.

92 Here, we addressed a novel dual-localized PPR protein OsPGL1 in rice, which  
93 is required for RNA editing at two different *cis* elements. Loss of function of *OsPGL1*  
94 caused a pale green leaves phenotype, resulting from defective photosynthetic  
95 complex in chloroplast development. Loss of editing at *ndhD-878* caused failure of  
96 conversion from serine to leucine, which an extremely conserved amino acid in plants.  
97 Further investigation showed OsPGL1 functions with MORF2/8/9 and directly binds  
98 to *ndhD* and *ccmFc* via its 9 PPR motifs. These results confirmed PPR proteins and  
99 MORFs are required for RNA editing, and function together via a complex editosome.

101 **Materials and Methods**

102

103 **Plasmid construction and transformation**

104 Two target sites at the 20 bp upstream of protospacer-adjacent motif sequence (PAM)  
105 according to the recognition principle of CRISPR/Cas9 were designed and analyzed  
106 the specificity by CAS-OFFinder (<http://www.rgenome.net/cas-offinder>) (Table S1).  
107 The target sequence joint was linked into gRNA-U3 and gRNA-U6 vector,  
108 respectively followed by two rounds of nest-PCR. PCR products were subsequently  
109 linked to CRISPR/Cas9 vector. The construction was identified through PCR and  
110 sequencing. Calli derived from ZhongHua 11 (*Oryza sativa. L. Japonica*) were used  
111 for *Agrobacterium*-mediated transformation. WT and CRISPR/Cas9 knockout lines  
112 were grown in a paddy field and greenhouse in Wuhan, China under proper  
113 management.

114

115 **Scanning electron microscopy and transmission electron microscopy assay**

116 For scanning electron microscopy assay, samples were prepared as described  
117 previously (Zhou *et al.*, 2011). Rice young leaves were cut into small section with a  
118 razor and immediately placed in 70% ethanol, 5% acetic acid, and 4% formaldehyde  
119 for 18 h. Samples were critical point dried, sputter coated with gold in an E-100 ion  
120 sputter, and observed with a scanning electron microscopy (Hitachi S-3000N, Japan).

121 For transmission electron microscopy, samples were fixed in 2.5% (w/v)  
122 paraformaldehyde and 0.25% glutaraldehyde in 0.2 N sodium phosphate buffer for  
123 2-4 h at 4 °C, pH 7.0, and were then post-fixed in 1% OsO<sub>4</sub> in PBS, pH 7.4.  
124 Following ethanol dehydration, samples were embedded in acrylic resin. Ultrathin

125 sections (50 to 70 nm) were double stained with 2% (w/v) uranyl acetate and 2.6%  
126 (w/v) lead citrate aqueous solution and examined with a transmission electron  
127 microscope at 200 kV (Tecnai G2 20 Twin, FEI, Netherlands).

128

### 129 **RNA Extraction and qRT-PCR**

130 Total RNA was extracted with 1 mL Trizol reagent according to the manufacturer's  
131 instructions (Invitrogen). After isopropanol precipitation, the RNA was resuspended  
132 in 30  $\mu$ l RNase-free water and treated with RNase-free DNase I (New England  
133 Biolabs). First-strand cDNA was reverse transcribed using random primers (Primers  
134 were listed in Table S2). Ubiquitin was detected as control for gene expression.

135

### 136 **Analysis of RNA editing**

137 For RNA editing analysis in the wild type and the *Ospgl1*, total RNAs were isolated  
138 from the young leaves using the Trizol reagent as described before (Hu *et al.*, 2012).  
139 RNA was treated with RNase-free DNase I (New England Biolabs), and confirmed by  
140 PCR. Then, the RNAs were reverse transcribed with random primers and the  
141 high-fidelity reverse transcriptase SuperScript III (Invitrogen). Primers were designed  
142 to cover all 491 mitochondrial editing sites and 21 chloroplast editing sites (Table S2).  
143 The RT-PCR products were sequenced directly.

144

### 145 **Subcellular localization of OsPGL1**

146 For transient expression in rice protoplast, 188 amino acid of the OsPGL1 N-terminal  
147 were cloned into HBT-sGFP driven by the cauliflower mosaic virus 35S promoter to  
148 construct the 35S:OsPGL1<sup>N1-188</sup>:sGFP fusion protein. Protoplast preparation and

149 transformation procedures were as previously described (Yu *et al.*, 2014).  
150 MitoTracker Red (Invitrogen) was used as a mitochondrial specific dye.

151

### 152 **RNA electrophoresis mobility shift assays (REMSA)**

153 The corresponding cDNA fragments of *OsPGL1* was amplified with specific primers  
154 (Table S2), and cloned into the pGEX-6p-1 vector to create the fusion protein  
155 GST-OsPGL1. Two RNA probes (probe 1 and probe 2) and negative control probe  
156 (probe C) containing the target editing site were synthesized and labeled with biotin at  
157 the 3' end by GenScript (Nanjing, China). For REMSA, the recombinant protein was  
158 incubated with RNA probe in a 20  $\mu$ l reaction mixture including 10  $\mu$ l of 2  $\times$  binding  
159 buffer (100 mM Na phosphate, pH 7.5, 10 units RNasin, 0.1 mg/mL BSA, 10 mM  
160 DTT, 2.5 mg/ mL heparin, and 300 mM NaCl). The mixture was incubated at 25  $^{\circ}$ C  
161 for 30 min, followed with separation by 5% native PAGE in 0.5 $\times$ TBE buffer and  
162 transferred onto the nylon membrane (Roche). For the competitive REMSA, the  
163 gradually increased concentration of the unlabeled probe was added into the reaction  
164 mixture followed the procedure described above.

165

### 166 **Complementation of *Ospgll* mutants**

167 For complementation of the *Ospgll* mutant, a full-length (1815bp) cDNA fragment  
168 was constructed into pCAMBIA-2300 vector driven by CMV-35S promoter and  
169 transformed into *Ospgll-1* mutant background by *agrobacterium*-mediated method.  
170 Independent transgenic lines were obtained and planted in Wuhan, China.

171

### 172 **Yeast two-hybrid assays**

173 The full-length cDNA of *OsPGL1* and *MORFs* were cloned into pGBKT7 and  
174 pGADT7 vector. The constructs were co-transformed into yeast (AH109 strain) in  
175 pairs according to previous study (Hu *et al.*, 2012).

176

#### 177 **GST pull-down assays**

178 The purified recombinant proteins (GST tag, Trx-His tag, GST-OsPGL1,  
179 Trx-MORF2-His, Trx-MORF8-His and Trx-MORF9-His) were dialyzed against  
180 phosphate-buffered saline (PBS; 137 mM NaCl, 2.7 mM KCl, 10 mM Na<sub>2</sub>HPO<sub>4</sub>, 2  
181 mM KH<sub>2</sub>PO<sub>4</sub>) for 24 h and quantified using the bicinchoninic acid (BCA) method. The  
182 recombinant protein GST-OsPGL1 was incubated with glutathione sepharose for 1 h  
183 on ice and washed with five volumes of PBS for five times. Trx-His, Trx-MORFs-His  
184 proteins were subsequently added to detect the interaction. The binding proteins were  
185 washed with five volumes of PBS for five times, eluted with glutathione reductase  
186 and separated by 10% SDS-PAGE. Products were transferred onto a polyvinylidene  
187 fluoride (PVDF) membrane (BioRad), and investigated with antibodies against GST  
188 and His respectively.

189

#### 190 **BiFC assays**

191 For bimolecular fluorescence complementation (BiFC) analysis, the full-length cDNA  
192 of *OsPGL1* without the stop codon was fused to the C-terminal fragment of yellow  
193 fluorescent protein (YFP) in pUC-SPYCE (C-terminal), MORF2, MORF8 and  
194 MORF9 were fused to the N-terminal fragment of YFP in pUC-SPYNE (N-terminal).  
195 The two vectors were co-transformed into rice protoplasts in pairs and observed by  
196 bright-field and fluorescent microscopy using a Leica DM4000B microscopy (Hu *et*  
197 *al.*, 2012).



198

### 199 **Co-immunoprecipitation analysis**

200 Total proteins from transgenic plants fused with FLAG (UBI: OsPGL1-FLAG) and  
201 GFP (35S: MORFs-GFP) were extracted with extraction buffer (100 mM Tris-HCl,  
202 200mM NaCl, 5 mM EGTA, 5 mM EDTA, 10 mM DTT, 0.6% TritonX-100, 1 mM  
203 PMSF, pH 8.0) and incubated with 2 $\mu$ g anti-GFP antibody overnight at 4°C, 100  $\mu$ l of  
204 protein A-Sepharose beads was added and incubated for a further 3 to 4 h.  
205 Immunoprecipitates were washed for five times with co-immunoprecipitation buffer,  
206 (150mM NaCl, 20mM Tris-HCl, 1mM EDTA, 0.2% NP-40, 1 mM PMSF, pH 7.4)  
207 and loaded in 6 $\times$ SDS loading buffer by denaturing for 10 min. The proteins were  
208 separated on a 10% SD-SPAGE gel and detected by immunoblotting with anti-FLAG  
209 and anti-GFP antibodies.

210

### 211 **Immunoblot analysis**

212 Total proteins were extracted from young leaves and quantified with the BCA protein  
213 assay kit (Thermo scientific). 10  $\mu$ g total proteins were separated by SDS-PAGE,  
214 transferred onto a polyvinylidene difluoride (PVDF) membrane (Bio-rad) and  
215 incubated with various primary antibodies against NdhD (Beijing Protein Innovation,  
216 China), PsaA, PsbA, PetA, AtpA, Lhca2 and Lhcb2 (Agrisera). Actin was used as a  
217 reference antibody. Detection was carried out by the ECL western blotting detection  
218 reagents (Bio-rad).

219

### 220 **Blue-native PAGE**

221 The equivalent of 500  $\mu$ g of total mitochondrial proteins from WT and *Ospgll-1*

222 mutant were treated and loaded on BN-PAGE according to the previous protocol (Liu  
223 *et al.*, 2012). The gel was firstly stained with coomassie brilliant blue. For  
224 immunoblotting, the gel was transferred to the PVDF membranes, antibodies against  
225 Cytc1 were used to detect the accumulation of complex III.

226

## 227 **Accession numbers**

228 Sequence for rice OsPGL1, chloroplast NdhD, and mitochondrial gene CcmFc can be  
229 found in the GenBank database under accession numbers XP\_015618645.1 (OsPGL1),  
230 NP\_039444 (NdhD), YP\_002000589 (CcmFc), respectively.

231

## 232 **Results**

233

### 234 **Phenotypic characterization of the *Ospgll* mutant**

235 We used Clustered Regularly Interspaced Short Palindromic Repeat (CRISPR) system  
236 to generate several PPRs mutant under the background of the ZhongHua 11 (ZH11,  
237 *Oryza sativa. L. Japonica*) and obtained two independent transgenic knocked-out lines  
238 of LOC\_Os12g06650. Further genome DNA sequencing revealed a 41 bp deletion  
239 from 288 to 328 and a 1 bp deletion at 530 in this PPR gene (Fig. 1A-C). Both two  
240 lines exhibited pale green leaves at all vegetative stages (Fig. 1D-F), thus we named  
241 this gene as *pale green leaves 1* (*Ospgll*) in this study. And we defined these two lines  
242 as *Ospgll-1* and *Ospgll-2*, respectively. The content of chlorophyll was drastically  
243 reduced than those in WT plants (Fig. 1G). This phenotype performed more  
244 pronounced in paddy fields (Fig. S1A). Despite of the distinct development on  
245 vegetative stage, the plant height, tiller number and seed setting were rarely impaired

246 (Fig. 1H-J). To confirm the phenotype of *Ospgll* knockout mutants, we also generated  
247 the transgenic RNAi lines. Results showed that suppression of *OsPGL1* expression  
248 recapitulated the knockout mutants phenotype (Fig. S2).

249 To dissect the morphologic details of the leaf, we performed scanning electron  
250 microscopy (SEM) and transmission electron microscopy (TEM) examinations. SEM  
251 results showed the leaf is complete and intact in WT (Fig. 2A), while some cracked  
252 holes were distributed in the leaf of *Ospgll-1* (Fig. 2F). Furthermore, TEM assays  
253 showed the starch granular stacks in WT plant were well-balanced (Fig. 2B), while  
254 the starch granular stacks in *Ospgll-1* were reduced and incompact (Fig. 2G). When  
255 we looked insight into the structure of thylakoid, results showed the density of  
256 well-organized thylakoid were not observed in *Ospgll-1*, which exhibited more  
257 hollow structures (Fig. 2C, 2H). In spite of the fact that chloroplasts were impaired,  
258 the ultrastructure of the mitochondria was undistinguishable between WT and  
259 *Ospgll-1* (Fig. 2D, 2E and 2I, 2J). These observations revealed that the *Ospgll*  
260 mutation primarily affects the development and morphology of chloroplasts rather  
261 than mitochondria.

262

### 263 ***OsPGL1* encodes a DYW-motif containing protein**

264 *OsPGL1* encodes a putative PPR protein consisting of 605 amino acids without intron.  
265 Motif prediction analysis by Pfam (<http://pfam.xfam.org/>) revealed that *OsPGL1*  
266 consists of 9 PPR motifs. 3 S motifs, 3 P motifs and 3 L motifs present staggered  
267 arrangement ( Fig. S3A, 3B). The C-terminal region from residues 392 to 605 shows  
268 the consensus sequences of the extension domains (E, E+, and DYW domains) (Fig.  
269 S4). This data indicated that *OsPGL1* belongs to the typical DYW type of PLS  
270 subfamily. Alignment of *OsPGL1* with its orthologs in various plants showed 75%、

271 75%、46%、51%、51%、47% similarity with *Zea mays* (GRMZM2G001466), *Sorghum*  
272 *bicolor* (Sb08g003980), *Arabidopsis thaliana* (AT4G15720,REME2), *Theobroma*  
273 *cacao* (XP\_017974392), *Glycine max* (XP\_003529581), and *Brassica napus*  
274 (BnaC07g33170D) Fig. S4). Previous study reported that REME2 is involved in  
275 RNA editing of *rps3-1534* and *rps4-175* in mitochondria (Bentolila *et al.*, 2014). The  
276 high similarity among OsPGL1, GRMZM2G001466 and Sb08g003980 implied the  
277 function of this PPR gene might be conserved in monocots. Based on the PPR-RNA  
278 recognition mode, we analyzed the conservation of the 1' and 6 amino acid of each  
279 motif, which is essential for RNA recognition. Results showed these candidate  
280 orthologs could be divided into two subgroup, monocots and dicots, which suggested  
281 the functional conservation respectively (Fig. S5). It also implied the distinct function  
282 between OsPGL1 and AtREME2.

283

#### 284 **Expression pattern of *OsPGL1***

285 To get insight into the expression pattern of *OsPGL1* in WT, RT-PCR and quantitative  
286 RT-PCR (qRT-PCR) were employed to detect various tissues. RT-PCR Results  
287 showed that *OsPGL1* was constitutively expressed in both vegetative and  
288 reproductive tissues, including root, stem, leaf, and panicle (Fig. 3A). Moreover,  
289 qRT-PCR data showed the expression level in root, stem and panicle, but  
290 preferentially accumulated in fresh leaf (Fig. 3B). These data are consistent with the  
291 results of the leaf phenotype, and slightly effects on plant height and seed setting.

292

#### 293 **OsPGL1 is a novel dual-localized PPR protein**

294 Plenty of reports confirmed that most PPR proteins are targeted to plastids,  
295 chloroplast or mitochondrion. With bioinformatic analysis of TargetP

296 (<http://www.cbs.dtu.dk/services/TargetP/>), *OsPGL1* was predicted to localize into  
297 chloroplast, and also into mitochondrion with a low degree of confidence. To make  
298 sure of the subcellular localization of OsPGL1, the N-terminal region (amino acids  
299 from 1 to 188) were fused with green fluorescent protein (sGFP), driven by CaMV35S  
300 promoter and transiently expressed in rice protoplast. Results showed the GFP signals  
301 could overlap the red auto-fluorescent signals of chlorophyll (Fig. 3C). Interestingly,  
302 there were still some spots could not overlap the signals from chloroplast, implied  
303 OsPGL1 might target into mitochondria. Subsequently, mitotracker red were used to  
304 indicate mitochondrion, which signals were also overlapped with the signals of  
305 OsPGL1-GFP (Fig. 3D). Therefore, OsPGL1 is a novel dual-localized PPR protein in  
306 rice, both targets into mitochondria and chloroplasts.

307

### 308 **OsPGL1 is involved in C-to-U RNA editing of *ndhD* and *ccmFc* transcripts**

309 Studies showed PPR proteins were involved in the RNA editing of one or several  
310 editing sites, especially in DYW subfamily (Sun *et al.*, 2016). Consideration of the  
311 dual-localization of OsPGL1, we checked all 491 editing sites in mitochondria and 21  
312 editing sites in chloroplasts respectively by RT-PCR. Sequencing results revealed that  
313 the C-to-U editing efficiency of *ndhD-878* and *ccmFc-543* dramatically decreased to  
314 zero in both two mutants expect for 8% at *ccmFc-543* in *Ospgll-2*, while *ndhD-878*  
315 and *ccmFc-543* were completely edited in WT (Fig. 4A). Consequently, abolishment  
316 of editing in *ndhD-878* recovered the codon from UUA to UCA, which resulted in the  
317 amino acid substitution from leucine to serine. The loss of editing in another site  
318 *ccmFc-543*, a mitochondrial RNA editing site converted the codon from GUU to  
319 GUC, due to the degeneracy of codon, the change of the nucleotide at this position  
320 does not cause any amino acid alteration, consistent with the results of no effects on  
321 mitochondrion in *Ospgll* (Fig. 2I, 2J).

322 To investigate the evolutionary conservation of the alteration from serine to  
323 leucine at the 293 position of NdhD protein sequence and valine at the 181 position of  
324 CcmFc protein sequence, the chloroplast NdhD orthologs and mitochondrial CcmFc  
325 orthologs from five representative species (*Oryza sativa*, *zea mays*, *Arabidopsis*  
326 *thaliana*, *Nicotiana tabacum* and *Brassica napus*) in plants were analyzed. Results  
327 showed these two residues are extremely conserved in the five tested species  
328 including monocots and dicots, implied that the leucine of NdhD and valine of CcmFc  
329 could important for plant development (Fig. 4B).

330

### 331 **OsPGL1 can bind to both *ndhD* and *ccmFc* transcripts**

332 To test the RNA binding activity of OsPGL1, we expressed recombinant OsPGL1 for  
333 further RNA electrophoresis mobility shift assays (REMSA). 9 PPR motifs from  
334 residues 46 to 605 was fused with a glutathione S-transferase (GST) tag for  
335 expression in *Escherichia coli*. The recombinant protein (GST-OsPGL1<sup>46-605</sup>) was  
336 analyzed by western blot with anti-GST antibody to confirm the high purity (Fig. S7b).  
337 Subsequently, the recombinant protein was dialyzed to remove the contamination of  
338 RNase for REMSA and further quantified. The *ndhD* and *ccmFc* probes include 35  
339 nucleotides surrounding the target editing sites were prepared and designated as probe  
340 1 and probe 2. Probe C (*nad3-155*) was used as a negative control probe which has  
341 been reported as a specific target of another rice PPR protein (manuscript is preparing)  
342 (Fig. 5A). GST-OsPGL1<sup>46-604</sup> and GST tag were incubated with the biotin-labeled  
343 RNA probes, respectively. Both of the two protein–RNA complexes were detected as  
344 a shifted band that migrated more slowly than free RNA probe in the native gel, but  
345 no retarded band was observed when incubated with the GST (Fig. 5B, 5C). In  
346 addition, as negative control, no retarded band was observed when probe C was  
347 incubated with GST-OsPGL1<sup>46-604</sup>. We next performed the competitor assay using

348 non-labeled RNA probe with the same sequence, the binding intensity of the band  
349 were decreased accompanied with the increased concentration of competitors (Fig. 5B,  
350 5C). These data validated the OsPGL1 binds to both *ndhD* and *ccmFc* transcripts  
351 directed via the PPR motifs. *ndhD* and *ccmFc* derived from chloroplast and  
352 mitochondrion also confirmed the dual-localization of OsPGL1.

353

### 354 **The transgenic complementation lines rescue the pale green phenotype**

355 To verify whether the pale green phenotype resulted from the dysfunction of *OsPGL1*  
356 in deed, we performed the transgenic complementation assay in mutant lines.  
357 Full-length coding sequences of *OsPGL1* was constructed into pCAMBIA-2300  
358 vector driven by CaMV-35S promoter and transformed into *Ospgll-1* mutant by  
359 *Agrobacterium*-mediated method. All 12 independent transgenic lines completely  
360 rescued the mutant pale green leaves phenotype (Fig. 6A). Furthermore, we checked  
361 the RNA editing efficiency of *ndhD-878* and *ccmFc-543* in all 12 independent  
362 transgenic complementation lines, results showed 35S:OsPGL1 completely recovered  
363 the RNA editing efficiency to 100% same as those in WT (Fig. 6B). Data indicates  
364 that the pale green leaves phenotype was in deed caused by loss of RNA editing of  
365 *ndhD-878*, which resulted from loss of function of *OsPGL1*.

366

### 367 **OsPGL1 interacts with three MORF proteins *in vitro* and *in vivo***

368 In addition to PPR proteins, another group of RNA editing factors in plant organelle  
369 was identified, the multiple organelle RNA editing factor (MORF) proteins, which has  
370 also been termed RNA editing factor interacting protein (RIP) proteins. There were  
371 five MORF proteins in rice, two of which were targeted exclusively in plastids,  
372 MORF2 and MORF9. MORF8 was a dual-localized protein which targeted to

373 mitochondria and plastids. The remaining two MORFs, MORF1 and MORF3 were  
374 targeted to mitochondria. Because of the dual-localization of OsPGL1, we further  
375 investigated the physical interactions between OsPGL1 and these MORF proteins in  
376 pairs. Firstly, we performed yeast two-hybrid assay, data showed that OsPGL1 can  
377 solid interact with three MORFs, MORF2, MORF8 and MORF9 in yeast. However,  
378 no interaction was observed between OsPGL1 and other two MORFs as well as the  
379 negative control (Fig. 7A). Interestingly, the interaction between OsPGL1 and  
380 MORF9 was much more stronger than those of other MORFs. Moreover, the  
381 interactions between OsPGL1 and MORF2/8/9 were also observed when we switched  
382 the bait and prey in a yeast two-hybrid system (Fig. S6). Data displayed the stronger  
383 interaction between OsPGL1 and MORF9, compared with others. Next, we performed  
384 GST pull-down assays to validate the interactions *in vitro*, the three MORF proteins  
385 were fused with His tag and OsPGL1 was fused with GST tag for expression (Fig.  
386 S8A). Recombinant proteins were further verified by western blots (Fig. S8B) and  
387 subjected for pull-down assay in pairs. Trx-MORF2-His, Trx-MORF8-His and  
388 Trx-MORF9-His were all pulled down by GST-OsPGL1, respectively, which  
389 demonstrated that OsPGL1 can interact with these three MORF proteins directly (Fig.  
390 7B).

391 To test the interactions *in vivo*, we performed bimolecular fluorescence  
392 complementation (BiFC) assays in rice protoplast. OsPGL1 and three MORFs were  
393 fused to the C-terminal and N-terminal of yellow fluorescent protein (YFP),  
394 respectively. Results showed that co-expression of OsPGL1-YFP<sup>C</sup> and  
395 MORF2-YFP<sup>N</sup>/MORF8-YFP<sup>N</sup>/MORF9-YFP<sup>N</sup> exhibited strong signals overlapped  
396 with chlorophyll, while the negative combination OsPGL1-YFP<sup>C</sup> and YFP<sup>N</sup> did not  
397 produce any detectable fluorescence signal (Fig. 7C). Interestingly, the signals from  
398 OsPGL1-YFP<sup>C</sup> and MORF8-YFP<sup>N</sup> were much more than chlorophyll, suggesting the  
399 interaction in mitochondria, which consistent with the dual-localization of OsPGL1



400 and MORF8.

401 Moreover, we generated the transgenic plants carrying UBI:OsPGL1-FLAG,  
402 35S:MORF2-GFP, 35S:MORF8-GFP and 35S:MORF9-GFP, respectively. The protein  
403 crude extractions were incubated for co-immunoprecipitation assays with anti-GFP  
404 antibodies. Results confirmed the interactions between OsPGL1 and MORFs (Fig.  
405 7D). Taken together, the results solidly demonstrated that OsPGL1 interacted with  
406 MORF2, MORF8 and MORF9 *in vitro* and *in vivo*.

407

#### 408 ***Ospgll* exhibited defective in photosynthetic complex**

409 To make clear whether the photosynthetic and respiratory complex were impaired in  
410 *Ospgll*, we detected the proteins involved in photosynthesis and electronic transfer  
411 chains pathway. Firstly, we examined NdhD in WT, *Ospgll* mutants and the  
412 complementation line. Results showed greatly reduced accumulation of NdhD,  
413 suggesting the loss of editing at *ndhD-878* generated an unstable NdhD in chloroplast  
414 (Fig. 8A). Meanwhile, the accumulation of the photosystem I (PSI) subunits PsaA,  
415 PSII subunits PsbA, cytochrome b6f (PetA), chloroplast ATP synthase subunit AtpA,  
416 light harvesting complex of PSI (Lhca2) and light harvesting complex of PSII (Lhcb2)  
417 were also examined. All of these proteins were dramatically decreased in both two  
418 mutant lines (Fig. 8A). As expected, the levels of NdhD and other subunits in  
419 photosynthetic complex were recovered in the transgenic complementation line (Fig.  
420 8A).

421 We next examined the proteins involved in mitochondrial electron transport  
422 chain pathway. Mitochondrial complexes isolated from calli of *Ospgll-1* and WT  
423 were separated on blue-native gel. No obvious changes were observed in all of the  
424 complexes via coomassie blue staining, implying *Ospgll* did not compromise the

425 function of mitochondria (Fig. 8B). Although the loss of RNA editing at *ccmFc-543*  
426 did not change the amino acid, we detected mitochondrial complex III as well, since  
427 CcmFc is a subunit of complex III. Protein immunoblotting with antibodies  
428 anti-CytC1 showed no difference at the amount of complex III in *Ospgll-1* compared  
429 with that in WT (Fig. 8B), consistent with the undistinguishable morphological  
430 structure of mitochondria between *Ospgll* and WT. Taken together, these results  
431 indicated photosynthetic complex was impaired while the respiratory complex was  
432 not affected in *Ospgll* mutants.

433

#### 434 **Altered expression of chloroplast development related genes in *Ospgll*.**

435 The development of chloroplast in plant is related to the coordinated expression of  
436 both chloroplast and nuclear genes. Therefore, we first examined the transcript level  
437 of the chloroplast-encoded genes at 5-leaf stage of *Ospgll* and WT plants, most of  
438 which are mediated by two types of RNA polymerase: plastid-encoded polymerase  
439 (PEP) and nuclear-encoded polymerase (NEP). Results showed that the expression  
440 levels of PEP-dependent genes (*rbcL*, *psaA*, *psbA*, and *petB*) were reduced in *Ospgll*,  
441 which is consistent with results of the detection of protein level. Whereas, the  
442 NEP-dependent genes: RNA polymerase (*rpoA* and *rpoB*) were activated in *Ospgll*  
443 (Fig. 9A). Results implied that some retrograde signals from chloroplast might  
444 activate NEP-dependent genes transcription for compensation in the development of  
445 chloroplast.

446 Besides chloroplast-encoded genes, we also investigated the expression of some  
447 nuclear-encoded genes related to chloroplast development and photosynthesis in  
448 *Ospgll* and WT plants, including *RNRS* (encoding the large subunit of RNR), *RpoTp*  
449 (encoding NEP core subunits), *CAB1R* and *CAB2R* (light-harvesting Chl *a/b*-binding  
450 protein of PSII), *HEMA1* (encoding a glutamyl-tRNA reductase), *rbcS* (encoding a

451 Rubisco small subunit), *YGL1* (encoding a chlorophyll synthetase) and *CAOI*  
452 (encoding chlorophyll A oxygenase1). qRT-PCR analysis showed that the expression  
453 level of these genes was reduced in the *Ospgll* mutant (Fig. 9B). Taken together,  
454 these data indicated that *OsPGL1* plays an important role in regulating the chloroplast  
455 development and photosynthesis.

456

### 457 **OsPGL1 recognizes the target RNA sequence**

458 PPR protein binds target RNA via a modular recognition mechanism. To evaluate the  
459 conservation of the P, L, S motifs of OsPGL1, the sequence of each motif were  
460 analyzed. The alignments of these 9 motifs showed that residue Thr, Ala and Ser at  
461 position 6, Asn and Asp at position 1' was conserved polar residues (Fig. 10A). More  
462 interestingly, residue Gly is also highly conserved at position 16, especially  
463 completely conserved at position 33 in P and L motifs (Fig. 10A). Data implied Gly  
464 might be essential for the function of PPR motif. To evaluate the match degree of  
465 OsPGL1 protein binding to its two target transcripts, we did a computational  
466 prediction. Alignments of the target sites of OsPGL1 showed comparatively high  
467 matches of PPR-RNA recognition basis with these two editing sites (Fig. 10B). The  
468 alignments also suggested the combinations between PPR motifs and its targeted  
469 nucleotides might be very flexible.

470

471

## 472 **Discussion**

473

### 474 **OsPGL1 is a dual-localization PPR protein for RNA editing.**

475 PPR proteins were confirmed as a trans-acting factor for organelle RNA and acted as  
476 site specific RNA binding proteins (Okuda *et al.*, 2006). Most PPRs were involved in  
477 organelle RNA editing either mitochondrion or chloroplasts specifically, few of them  
478 are dual-localization. SOAR1 is a cytosol-nucleus dual-localized pentatricopeptide  
479 repeat (PPR) protein, which acting downstream of CHLH/ABAR and upstream of a  
480 nuclear ABA-responsive bZIP transcription factor ABI5 (Jiang *et al.*, 2015). PNM1 is  
481 dual localized to mitochondria and nuclei in Arabidopsis, which was only associated  
482 with polysomes and played a role in translation in mitochondria, and interacted with  
483 TCP8 in the nucleus (Hammani *et al.*, 2011). Both PPR2263 and MEF29 dually  
484 targeted to mitochondria and chloroplasts, and are required for RNA editing in maize  
485 and Arabidopsis, respectively (Sosso *et al.*, 2012). Here, we firstly reported a novel  
486 dual-localization PPR protein to mitochondria and chloroplasts in rice. Our data  
487 showed OsPGL1 is also required for RNA editing, and binds to target RNA directly.  
488 Both *ndhD-878* (chloroplast) and *ccmFc-543* (mitochondrion) were completely edited  
489 in WT, even though the editing of *ccmFc-543* (mitochondrion) is synonymous. Loss  
490 of function of OsPGL1 leads to the editing efficiency decrease to zero, and resulted in  
491 the pale green leaf phenotype. The dual-localization of OsPGL1 suggested the signal  
492 peptide sequence of OsPGL1 could be applied for trans-locating an artificial protein  
493 for mitochondria and chloroplasts synchronously in future.

494

#### 495 **OsPGL1 recognizes target RNAs and functions with MORF proteins**

496 The PPR motif consists of two anti-parallel  $\alpha$ -helixes, the binding specificity depend  
497 on the first  $\alpha$ -helix (Barkan *et al.*, 2012). Bioinformatic and structural analysis  
498 indicated that three positions of amino acids distributed in two adjacent PPR repeats  
499 were of great importance in recognizing its target RNA base (Takenaka *et al.*, 2013a).  
500 The alignment of OsPGL1 showed that high conservation of these positions in

501 monocots (Fig. S5), implying the conserved function of those orthologs genes in RNA  
502 editing of *ndhD* and *ccmFc* in monocots. OsPGL1 was a DYW subgroup PPR protein  
503 with 3 P, 3 L and 3S motifs. More interesting finding is that the highly conservation of  
504 Gly and Ala at position 16, and completely conservation of Gly at position 33 in P and  
505 L motifs, which could be important for the function of PPR proteins. In this study, the  
506 RNA recognition also follows the rules that the editing site is located at downstream  
507 of binding sites, and the interval space is 4 nucleotides. In a word, such modular mode  
508 can help us to deeply understand the RNA recognition of PPR proteins and its  
509 application in future.

510 Non-PPR editing factors RIPs/MORFs, ORRM, OZ, and PPO1 have been  
511 identified as components of the plant RNA editosome, which was required for RNA  
512 editing (Sun *et al.*, 2016). In Arabidopsis plastids, both of the two plastid-localized  
513 members, MORF2 and MORF9 were required for RNA editing for mostly sites  
514 (Takenaka *et al.*, 2012). Recent study showed the RNA-binding activity of an  
515 artificial (PLS)<sub>3</sub>PPR could be sharply increased upon MORF9 binding, suggested the  
516 interaction between PPR and MORF9 could be more vital than that of others (Yan *et al.*,  
517 2017). In Arabidopsis, CLB19 interacted with MORF2, PDM2 interacted with  
518 MORF2/9, all of PDM1/SEL1, PPO1 and ORRM6 interacted with MORF2/8/9 (Du *et al.*,  
519 2017; Hackett *et al.*, 2017; Ramos-Vega *et al.*, 2015; Zhang *et al.*, 2014; Zhang *et al.*,  
520 2015). All these data indicated the editosome in plant is quite complicated.  
521 Nevertheless, MORF proteins were rarely reported in rice. Recently, WSP1, a  
522 sequence similarity with MORF protein was identified in rice, which was involved in  
523 RNA editing and splicing of several plastid genes (Zhang *et al.*, 2017). In our study,  
524 we confirmed that OsPGL1 can also interact with MORF2, MORF8 and MORF9 *in vitro*  
525 and *in vivo*. The interaction between OsPGL1 and MORF9 was significant  
526 stronger than that of others, implying the RNA binding activities of OsPGL1 could be  
527 enhanced by cooperation with MORF9. According to our data, we believe that

528 OsPGL1 conducts the organelle RNA editing via an editosome coupled with MORF  
529 proteins. Other factors or subunits of editosome will be further explored based on our  
530 transgenic plants carrying UBI: OsPGL1-FLAG, 35S:MORF2-GFP,  
531 35S:MORF8-GFP and 35S:MORF9-GFP.

532

### 533 **OsPGL1 plays an important role in rice chloroplast development**

534 Leaf is an important tissue for plant. In this study, we constructed CRISPR/Cas9  
535 knockout mutants of PPR gene *OsPGL1*, *Ospgll-1* and *Ospgll-2*, both of which  
536 exhibited pale green leaves during the whole vegetative stages. Further investigation  
537 revealed the chloroplast development and photosynthesis were defective on RNA and  
538 protein level in the mutant. NEP-dependent genes were activated in mutant implied  
539 some unknown retrograde signals from chloroplast were involved in compensation  
540 effects in the development of chloroplast. Complementation lines could rescue this  
541 aberrant phenotype, suggested that the base deletion mutation in *OsPGL1* gene was  
542 responsible for the PGL phenotype. OsPGL1 regulated chloroplast development by  
543 organelle RNA editing of *ndhD*. The highly conserved leucine at NdhD-293 is  
544 important for the structure or function of NdhD. We proposed the loss of RNA editing  
545 might lead to unstable NdhD in chloroplast, based on the results of protein  
546 immunoblotting, which showed the amount of photosynthetic complex subunits were  
547 dramatically decreased in mutants. Results suggested that PPR genes play a vital role  
548 in regulating chloroplast development via RNA editing in plant.

549

### 550 **Acknowledgements**

551 We thank Yaoguang Liu laboratory for providing us with pYLCRISPR/Cas9 vectors.  
552 No conflict of interest declared

553

554 **Author contributions**

555 H.X., J.Hu. and Y.Z. designed the study. H.X. and Q.Z. contributed to constructed and  
556 *Ospgll-1*, *Ospgll-2* mutants and RNAi lines. H.X. and Y.X. carried out most  
557 experiments, H.X. and Q.Z. conducted SEM and TEM, F.Z. and C.N. performed  
558 expression and purification of recombinant proteins, J.Huang. contributed to field  
559 managements, H.X. and J.Hu. wrote the manuscript with feedback from all authors.

560

561 **Funding information**

562 This work is supported by funds from the National Key Research and Development  
563 Program of China (2016YFD0100804), the National Natural Science Foundation of  
564 China (31371698 and 31670310) and Suzhou Science and Technology Foundation  
565 (SNG2017061).

566

567 **Supplemental data**

568

569 **Figure S1.** Phenotype of the *Ospgll* and WT in a paddy field.

570 **Figure S2.** Phenotype of WT and RNAi line.

571 **Figure S3.** Schematic structural sequence of OsPGL1.

572 **Figure S4.** Sequence alignment of *OsPGL1* with its orthologs in various plants.

573 **Figure S5.** Conservation of the amino acid at 6 and 1' position of each PPR motif.

574 **Figure S6.** Interaction of OsPGL1 with MORF2/MORF8/MORF9 by yeast

575 two-hybrid assay.

576 **Figure S7.** Expression and purification of GST-OsPGL1<sup>46-604</sup>.

577 **Figure S8.** Expression and purification of Trx-MORF2-His, Trx-MORF8-His and  
578 Trx-MORF9-His.

579 **Table S1.** Design of target adaptor for CRISPR/Cas9 system.

580 **Table S2.** Primers used for qRT-PCR, vector construction and RNA editing.

581

## 582 **References**

583

584 **Barkan A, Rojas M, Fujii S, Yap A, Chong YS, Bond CS, Small I.** 2012. A  
585 combinatorial amino acid code for RNA recognition by pentatricopeptide repeat  
586 proteins. *PLoS Genet* **8**, e1002910.

587 **Bentolila S, Babina AM, Germain A, Hanson MR.** 2014. Quantitative trait locus  
588 mapping identifies REME2, a PPR-DYW protein required for editing of specific C  
589 targets in Arabidopsis mitochondria. *RNA Biol* **10**, 1520-1525.

590 **Bentolila S, Heller WP, Sun T, Babina AM, Friso G, van Wijk KJ, Hanson MR.**  
591 2012. RIP1, a member of an Arabidopsis protein family, interacts with the protein  
592 RARE1 and broadly affects RNA editing. *Proc Natl Acad Sci U S A* **109**, E1453-1461.

593 **Chateigner-Boutin AL, Small I.** 2010. Plant RNA editing. *RNA Biol* **7**, 213-219.

594 **Cheng S, Gutmann B, Zhong X, Ye Y, Fisher MF, Bai F, Castleden I, Song Y,**  
595 **Song B, Huang J, Liu X, Xu X, Lim BL, Bond CS, Yiu SM, Small I.** 2016.  
596 Redefining the structural motifs that determine RNA binding and RNA editing by  
597 pentatricopeptide repeat proteins in land plants. *Plant J* **85**, 532-547.

598 **Covello PS, Gray MW.** 1989. RNA editing in plant mitochondria. *Nature* **341**,  
599 662-666.

600 **Du L, Zhang J, Qu S, Zhao Y, Su B, Lv X, Li R, Wan Y, Xiao J.** 2017. The



- 601 Pentatricopeptide Repeat Protein Pigment-Defective Mutant2 is Involved in the  
602 Regulation of Chloroplast Development and Chloroplast Gene Expression in  
603 Arabidopsis. *Plant Cell Physiol* **58**, 747-759.
- 604 **Hackett JB, Shi X, Kobylarz AT, Lucas MK, Wessendorf RL, Hines KM,**  
605 **Bentolila S, Hanson MR, Lu Y.** 2017. An Organelle RNA Recognition Motif Protein  
606 Is Required for Photosystem II Subunit psbF Transcript Editing. *Plant Physiol* **173**,  
607 2278-2293.
- 608 **Hammani K, Gobert A, Hleibieh K, Choulier L, Small I, Giege P.** 2011. An  
609 Arabidopsis dual-localized pentatricopeptide repeat protein interacts with nuclear  
610 proteins involved in gene expression regulation. *Plant Cell* **23**, 730-740.
- 611 **Hess GT, Fresard L, Han K, Lee CH, Li A, Cimprich KA, Montgomery SB,**  
612 **Bassik MC.** 2016. Directed evolution using dCas9-targeted somatic hypermutation in  
613 mammalian cells. *Nat Methods* **13**, 1036-1042.
- 614 **Hu J, Wang K, Huang W, Liu G, Gao Y, Wang J, Huang Q, Ji Y, Qin X, Wan L,**  
615 **Zhu R, Li S, Yang D, Zhu Y.** 2012. The rice pentatricopeptide repeat protein RF5  
616 restores fertility in Hong-Lian cytoplasmic male-sterile lines via a complex with the  
617 glycine-rich protein GRP162. *Plant Cell* **24**, 109-122.
- 618 **Jiang SC, Mei C, Liang S, Yu YT, Lu K, Wu Z, Wang XF, Zhang DP.** 2015.  
619 Crucial roles of the pentatricopeptide repeat protein SOAR1 in Arabidopsis response  
620 to drought, salt and cold stresses. *Plant Mol Biol* **88**, 369-385.
- 621 **Kim D, Lim K, Kim ST, Yoon SH, Kim K, Ryu SM, Kim JS.** 2017. Genome-wide  
622 target specificities of CRISPR RNA-guided programmable deaminases. *Nat*  
623 *Biotechnol* **35**, 475-480.
- 624 **Kim U, Wang Y, Sanford T, Zeng Y, Nishikura K.** 1994. Molecular cloning of  
625 cDNA for double-stranded RNA adenosine deaminase, a candidate enzyme for  
626 nuclear RNA editing. *Proc Natl Acad Sci U S A* **91**, 11457-11461.
- 627 **Liu G, Tian H, Huang YQ, Hu J, Ji YX, Li SQ, Feng YQ, Guo L, Zhu YG.** 2012.  
628 Alterations of mitochondrial protein assembly and jasmonic acid biosynthesis  
629 pathway in Honglian (HL)-type cytoplasmic male sterility rice. *J Biol Chem* **287**,  
630 40051-40060.
- 631 **Lu Y, Zhu JK.** 2017. Precise Editing of a Target Base in the Rice Genome Using a

- 632 Modified CRISPR/Cas9 System. *Mol Plant* **10**, 523-525.
- 633 **Lurin C, Andres C, Aubourg S, Bellaoui M, Bitton F, Bruyere C, Caboche M,**  
634 **Debast C, Gualberto J, Hoffmann B, Lecharny A, Le Ret M, Martin-Magniette**  
635 **ML, Mireau H, Peeters N, Renou JP, Szurek B, Taconnat L, Small I.** 2004.  
636 Genome-wide analysis of Arabidopsis pentatricopeptide repeat proteins reveals their  
637 essential role in organelle biogenesis. *Plant Cell* **16**, 2089-2103.
- 638 **Ma Y, Zhang J, Yin W, Zhang Z, Song Y, Chang X.** 2016. Targeted AID-mediated  
639 mutagenesis (TAM) enables efficient genomic diversification in mammalian cells. *Nat*  
640 *Methods* **13**, 1029-1035.
- 641 **McDougall WM, Okany C, Smith HC.** 2011. Deaminase activity on single-stranded  
642 DNA (ssDNA) occurs in vitro when APOBEC3G cytidine deaminase forms  
643 homotetramers and higher-order complexes. *J Biol Chem* **286**, 30655-30661.
- 644 **Mehta A, Driscoll DM.** 2002. Identification of domains in apobec-1  
645 complementation factor required for RNA binding and apolipoprotein-B mRNA  
646 editing. *RNA* **8**, 69-82.
- 647 **Melcher T, Maas S, Herb A, Sprengel R, Seeburg PH, Higuchi M.** 1996. A  
648 mammalian RNA editing enzyme. *Nature* **379**, 460-464.
- 649 **Okuda K, Nakamura T, Sugita M, Shimizu T, Shikanai T.** 2006. A  
650 pentatricopeptide repeat protein is a site recognition factor in chloroplast RNA editing.  
651 *J Biol Chem* **281**, 37661-37667.
- 652 **Ramos-Vega M, Guevara-Garcia A, Llamas E, Sanchez-Leon N, Olmedo-Monfil**  
653 **V, Vielle-Calzada JP, Leon P.** 2015. Functional analysis of the Arabidopsis thaliana  
654 CHLOROPLAST BIOGENESIS 19 pentatricopeptide repeat editing protein. *New*  
655 *Phytol* **208**, 430-441.
- 656 **Salone V, Rudinger M, Polsakiewicz M, Hoffmann B, Groth-Malonek M, Szurek**  
657 **B, Small I, Knoop V, Lurin C.** 2007. A hypothesis on the identification of the editing  
658 enzyme in plant organelles. *FEBS Lett* **581**, 4132-4138.
- 659 **Schmitz-Linneweber C, Small I.** 2008. Pentatricopeptide repeat proteins: a socket  
660 set for organelle gene expression. *Trends Plant Sci* **13**, 663-670.
- 661 **Small ID, Peeters N.** 2000. The PPR motif - a TPR-related motif prevalent in plant

- 662 organellar proteins. *Trends Biochem Sci* **25**, 46-47.
- 663 **Sosso D, Mbelo S, Vernoud V, Gendrot G, Dedieu A, Chambrier P, Dauzat M,**  
664 **Heurtevin L, Guyon V, Takenaka M, Rogowsky PM.** 2012. PPR2263, a  
665 DYW-Subgroup Pentatricopeptide repeat protein, is required for mitochondrial nad5  
666 and cob transcript editing, mitochondrion biogenesis, and maize growth. *Plant Cell* **24**,  
667 676-691.
- 668 **Sun T, Bentolila S, Hanson MR.** 2016. The Unexpected Diversity of Plant Organelle  
669 RNA Editosomes. *Trends Plant Sci* **21**, 962-973.
- 670 **Takenaka M, Zehrmann A, Brennicke A, Graichen K.** 2013a. Improved  
671 computational target site prediction for pentatricopeptide repeat RNA editing factors.  
672 *PLoS One* **8**, e65343.
- 673 **Takenaka M, Zehrmann A, Verbitskiy D, Hartel B, Brennicke A.** 2013b. RNA  
674 editing in plants and its evolution. *Annu Rev Genet* **47**, 335-352.
- 675 **Takenaka M, Zehrmann A, Verbitskiy D, Kugelman M, Hartel B, Brennicke A.**  
676 2012. Multiple organellar RNA editing factor (MORF) family proteins are required  
677 for RNA editing in mitochondria and plastids of plants. *Proc Natl Acad Sci U S A* **109**,  
678 5104-5109.
- 679 **Teng B, Burant CF, Davidson NO.** 1993. Molecular cloning of an apolipoprotein B  
680 messenger RNA editing protein. *Science* **260**, 1816-1819.
- 681 **Yin P, Li Q, Yan C, Liu Y, Liu J, Yu F, Wang Z, Long J, He J, Wang HW, Wang J,**  
682 **Zhu JK, Shi Y, Yan N.** 2013. Structural basis for the modular recognition of  
683 single-stranded RNA by PPR proteins. *Nature* **504**, 168-171.
- 684 **Yu C, Wang L, Chen C, He C, Hu J, Zhu Y, Huang W.** 2014. Protoplast: a more  
685 efficient system to study nucleo-cytoplasmic interactions. *Biochem Biophys Res*  
686 *Commun* **450**, 1575-1580.
- 687 **Zhang F, Tang W, Hedtke B, Zhong L, Liu L, Peng L, Lu C, Grimm B, Lin R.**  
688 2014. Tetrapyrrole biosynthetic enzyme protoporphyrinogen IX oxidase 1 is required  
689 for plastid RNA editing. *Proc Natl Acad Sci U S A* **111**, 2023-2028.
- 690 **Zhang HD, Cui YL, Huang C, Yin QQ, Qin XM, Xu T, He XF, Zhang Y, Li ZR,**  
691 **Yang ZN.** 2015. PPR protein PDM1/SEL1 is involved in RNA editing and splicing of

692 plastid genes in *Arabidopsis thaliana*. *Photosynth Res* **126**, 311-321.

693 **Zhang Z, Cui X, Wang Y, Wu J, Gu X, Lu T.** 2017. The RNA Editing Factor WSP1  
694 Is Essential for Chloroplast Development in Rice. *Mol Plant* **10**, 86-98.

695 **Zhou S, Wang Y, Li W, Zhao Z, Ren Y, Wang Y, Gu S, Lin Q, Wang D, Jiang L,**  
696 **Su N, Zhang X, Liu L, Cheng Z, Lei C, Wang J, Guo X, Wu F, Ikehashi H, Wang**  
697 **H, Wan J.** 2011. Pollen semi-sterility1 encodes a kinesin-1-like protein important for  
698 male meiosis, anther dehiscence, and fertility in rice. *Plant Cell* **23**, 111-129.

699 **Zong Y, Wang Y, Li C, Zhang R, Chen K, Ran Y, Qiu JL, Wang D, Gao C.** 2017.  
700 Precise base editing in rice, wheat and maize with a Cas9-cytidine deaminase fusion.  
701 *Nat Biotechnol* **35**, 438-440.

702

703

## 704 **Figure legends**

705

### 706 **Figure 1. Mutant and phenotypic characterization of *Ospgll***

707 **(A)** Schematic drawing of the intronless gene *OsPGL1* attaching the position of  
708 the deletion in *Ospgll*.

709 **(B)** Alignment of WT and mutant DNA sequences around the target sites highlighting  
710 the deletion of 41bp in *Ospgll-1* and 1bp deletion in *Ospgll-2* marked with a pink  
711 box.

712 **(C)** Sequencing results of *Ospgll-1* and *Ospgll-2* heterozygotes.

713 **(D)** Comparison of leaves from *Ospgll-1* and WT plant at the two-leaf stage, the red  
714 box shows magnified view, bar = 2cm.

715 **(E)** Comparison of leaves from *Ospgll-1* and WT plant at the three-leaf stage, the red

- 716 box shows magnified view, bar = 2cm.
- 717 **(F)** Comparison of leaves from *Ospgll-1* and WT plant at the tillering stage, the red  
718 box shows magnified view, bar = 5cm.
- 719 **(G)** Comparison of the chlorophyll content in *Ospgll-1* and WT. Bars represent mean  
720  $\pm$  SD from three independent biological replicates. Asterisks indicate statistically  
721 significant differences compared with the WT (Student's t-test: \*\*\* P< 0.001).
- 722 **(H)** Comparison of the plant height of *Ospgll-1* and WT plant.
- 723 **(I)** Comparison of the tiller number of *Ospgll-1* and WT plant.
- 724 **(J)** Comparison of the seed setting of *Ospgll-1* and WT plant.

725

726 **Figure 2. Scanning electron microscopy and transmission electron microscopy**  
727 **examination of leaves at tillering stage of WT and *Ospgll-1***

- 728 **(A)** Scanning electron microscopy image of WT leaf, bar = 20  $\mu$ m
- 729 **(B)** Transmission electron microscopy image of WT chloroplasts, bar = 2 $\mu$ m
- 730 **(C)** A higher magnification image of WT chloroplast from **(B)**, bar = 0.3 $\mu$ m
- 731 **(D)** Transmission electron microscopy image of WT mitochondria, bar = 0.5 $\mu$ m
- 732 **(E)** A higher magnification image of WT mitochondrion from **(D)**, bar = 0.15 $\mu$ m
- 733 **(F)** Scanning electron microscopy image of mutant leaf, the image shows a defective  
734 Leaf surface morphology with cracked, broken holes at the pale parts of *Ospgll-1*, bar  
735 = 20  $\mu$ m
- 736 **(G)** Transmission electron microscopy image of chloroplasts in pale parts of *Ospgll-1*  
737 mutant leaf, the image shows incompact granal stacks and lacked well-structured

738 thylakoid, bar = 1 $\mu$ m

739 **(H)** A higher magnification image of chloroplast in pale parts of *Ospgll-1* mutant leaf  
740 from **(G)**, bar = 0.3 $\mu$ m

741 **(I)** Transmission electron microscopy image of mitochondria in *Ospgll-1* leaf, bar =  
742 0.3 $\mu$ m

743 **(J)** A higher magnification image of *Ospgll-1* mitochondrion from **(I)**, bar = 0.15 $\mu$ m

744

745 **Figure 3. Expression and subcellular localization analysis of *OsPGL1***

746 **(A)** RT-PCR examination of *OsPGL1* in different tissues of WT. R, Root; S, Steam;  
747 L3, three-leaf stage; L4, four-leaf stage; L5, three-leaf stage, five-leaf stage; P,  
748 panicle.

749 **(B)** Real time RT-PCR examination of *OsPGL1* in different tissues of WT. Error bars  
750 represent the SD.

751 **(C)** Transient expression of 35S:sGFP (top) and 35S:OsPGL1<sup>N1-188</sup>-sGFP (bottom) in  
752 rice protoplast. Bar = 5  $\mu$ m.

753 **(D)** Transient expression of 35S:sGFP (top) and 35S:OsPGL1<sup>N1-188</sup>-sGFP (bottom) in  
754 rice protoplast. MitoTracker Red were used for mitochondria indicator. Bar = 5  
755  $\mu$ m.

756

757 **Figure 4. Organelle RNA editing analysis in different species**

758 **(A)** RNA editing analysis of the *ndhD-878* and *ccmF<sub>c</sub>-543* sites from WT and  
759 *Ospgll-1* leaves. The black stars marks the editing site, the editing efficiency was

760 presented under the target sites.

761 **(B)** Alignment of the orthologous NdhD and CcmFc amino acids sequences in five  
762 different species around the corresponding affected residues. Numbers and the red  
763 rectangular box indicate the converted amino acid.

764

765 **Figure 5. OsPGL1 possesses specific RNA binding activities**

766 **(A)** Schematic sequences of RNA probes. Edited sites were indicated and marked in  
767 red letter. Probe C is a negative control in this study.

768 **(B)** RNA electrophoresis mobility shift assays (REMSA) of GST-OsPGL1<sup>46-605</sup> and  
769 GST-tag with RNA probe 1. Unlabeled probe 1 was used as competitor at a range  
770 of the concentrations for competitive REMSA. GST-tag and probe C were used as  
771 negative control.

772 **(C)** RNA electrophoresis mobility shift assays (REMSA) of GST-OsPGL1<sup>46-605</sup> and  
773 GST-tag with RNA probe 2. Unlabeled probe 2 was used as competitor at a range  
774 of the concentrations for competitive REMSA. GST-tag and probe C were used as  
775 negative control.

776

777 **Figure 6. Complementation analysis of *Ospgll-1***

778 **(A)** The phenotypes of WT, *Ospgll-1* and complemented T<sub>0</sub> plant (com) at the  
779 tillering stage. bars = 5cm.

780 **(B)** RNA editing efficiency of *ndhD-878* and *ccmFc-543* comparison among WT,  
781 *Ospgll-1* and complemented T<sub>0</sub> plant (com), the stars show editing sites.

782

783 **Figure 7. OsPGL1 directly interacts with MORF2/8/9 proteins**

784 (A) Yeast-two hybrid assay, pGAD, GAL4 activation domain, used as prey vector,  
785 pGBK, GAL4 DNA binding domain, used as bait vector, SD/-TL and SD/-TLHA  
786 indicate SD/-Trp-Leu and SD/-Trp-Leu-His-Ade dropout plates, respectively.  
787 pGBK-53 and pGBK-lam was used as positive and negative control.  
788 Co-transcription of pGAD-T and pGBK-OsPGL1 used for self-activation  
789 detection.

790 (B) GST Pull-down assay, the interaction between OsPGL1 and MORF2/8/9 proteins  
791 with detected by GST Pull-down assay, respectively. GST and Trx-His tag protein  
792 was used as control. The eluates were immunoblotted with anti-GST and anti-His  
793 antibodies, respectively.

794 (C) Bimolecular fluorescence complementation assay showing that OsPGL1-YFP<sup>C</sup>  
795 interacts with MORF2- YFP<sup>N</sup>, MORF8- YFP<sup>N</sup> and MORF9- YFP<sup>N</sup> to produce  
796 YFP fluorescence in the chloroplasts. Bar = 5μm.

797 (D) Co-immunoprecipitation assay detection with anti-FLAG and anti-GFP antibodies,  
798 respectively.

799

800 **Figure 8. Immunoblotting analysis of the subunits of photosynthetic complexes**  
801 **and respiratory complex III**

802 (A) Immunoblot analysis of the subunits of photosynthetic complex in WT, *Ospgll*  
803 mutants, and complementation line at 4-leaf stage. Actin served as reference  
804 antibody, CBB staining indicated the loading control. Lanes were loaded with a  
805 series of dilutions as indicated.

806 (B) The level of major protein of mitochondrial respiratory complex III analysis by



807 BN-PAGE (left) and immunoblot (right). Cytc1 was used as a representative  
808 subunit of complex III.

809

810 **Figure 9. Expression Analysis of chloroplast development related genes**

811 (A) Real time RT-PCR examination of PEP-dependent genes (*rbcL*, *psaA*, *psbA*, and  
812 *petB*) and NEP-dependent genes (*rpoA* and *rpoB*) in WT and *Ospgll* at 5-leaf  
813 stage. Error bars represent the SD. (Student's t-test: \* P< 0.05, \*\* P< 0.01)

814 (B) Real time RT-PCR examination of chloroplast development and photosynthesis  
815 related genes in WT and *Ospgll* at 5-leaf stage. Error bars represent the SD.  
816 (Student's t-test: \*\* P< 0.01)

817

818 **Figure 10. Alignment of PPR motifs of OsPGL1 with the cis-elements**

819 (A) Sequence logo for PPR motifs in OsPGL1, the two positions that contribute to  
820 RNA binding specificity was indicated by stars. Sequence logos were constructed  
821 by Web-Logo.

822 (B) Alignment of amino acid residues at position 6 and 1' in each neighboring PPR  
823 motif of OsPGL1 with the putative cis-elements surrounding the editing sites.  
824 Nucleotides matching the PPR-RNA recognition combination were marked in  
825 red.

826

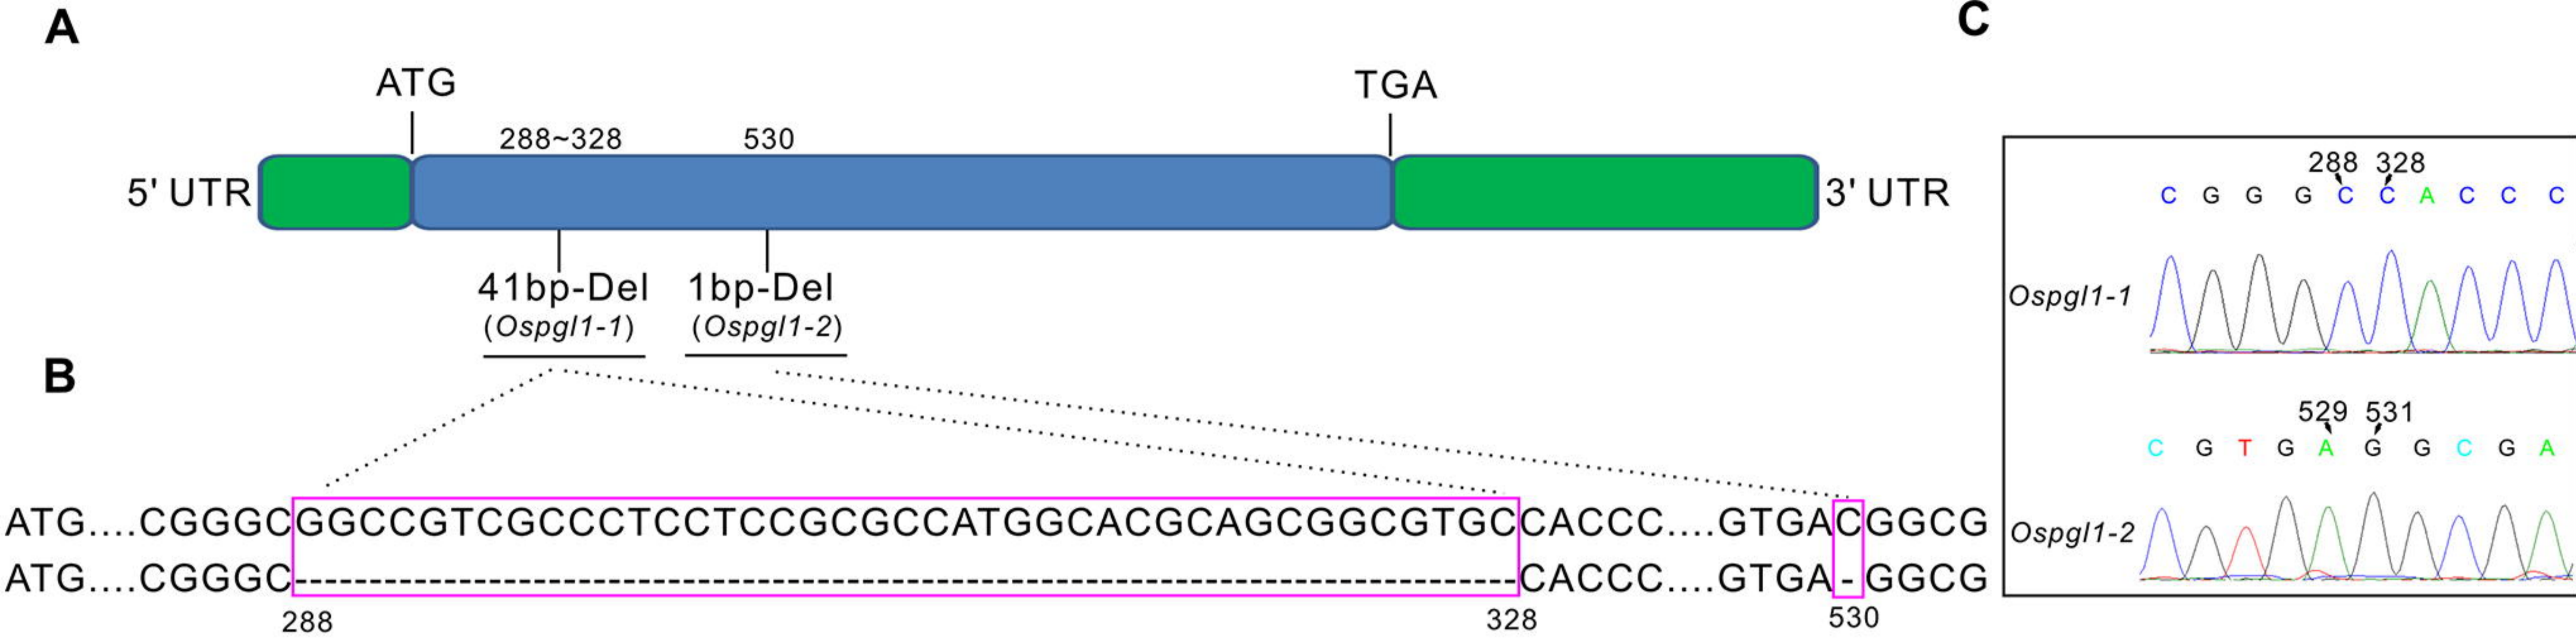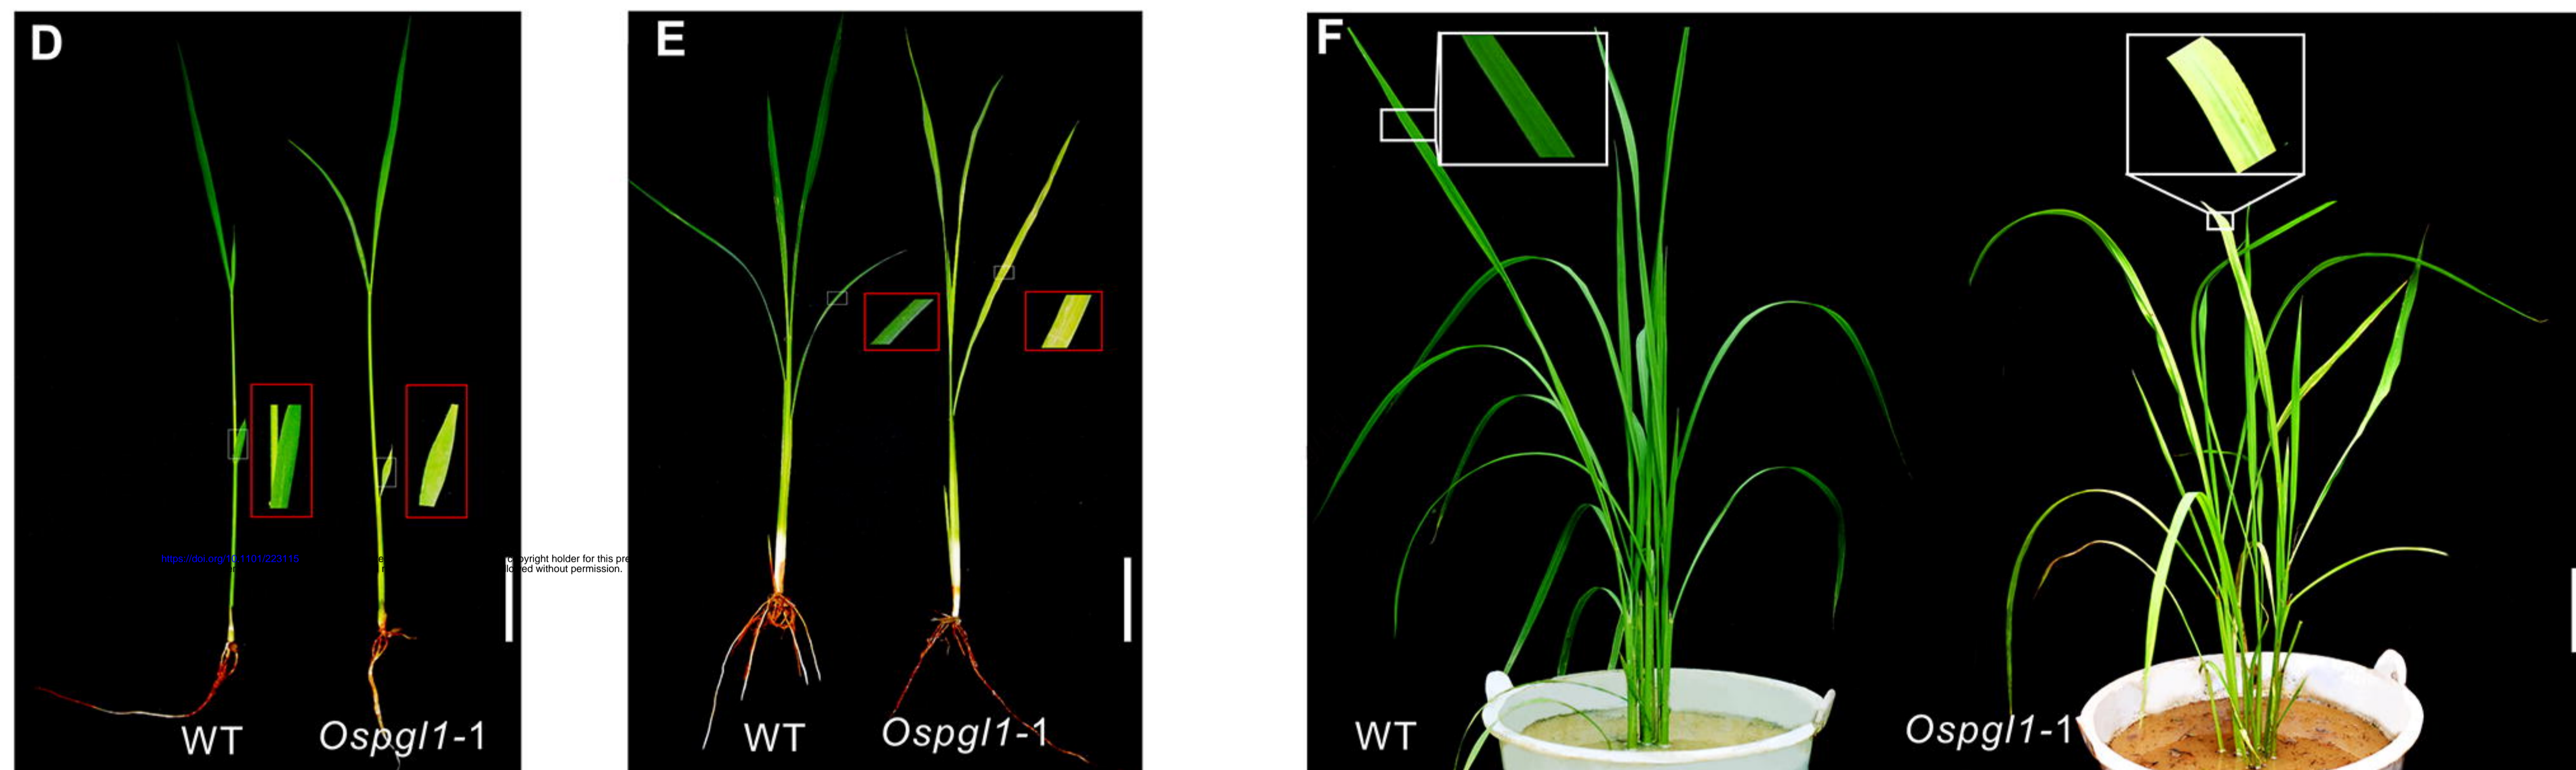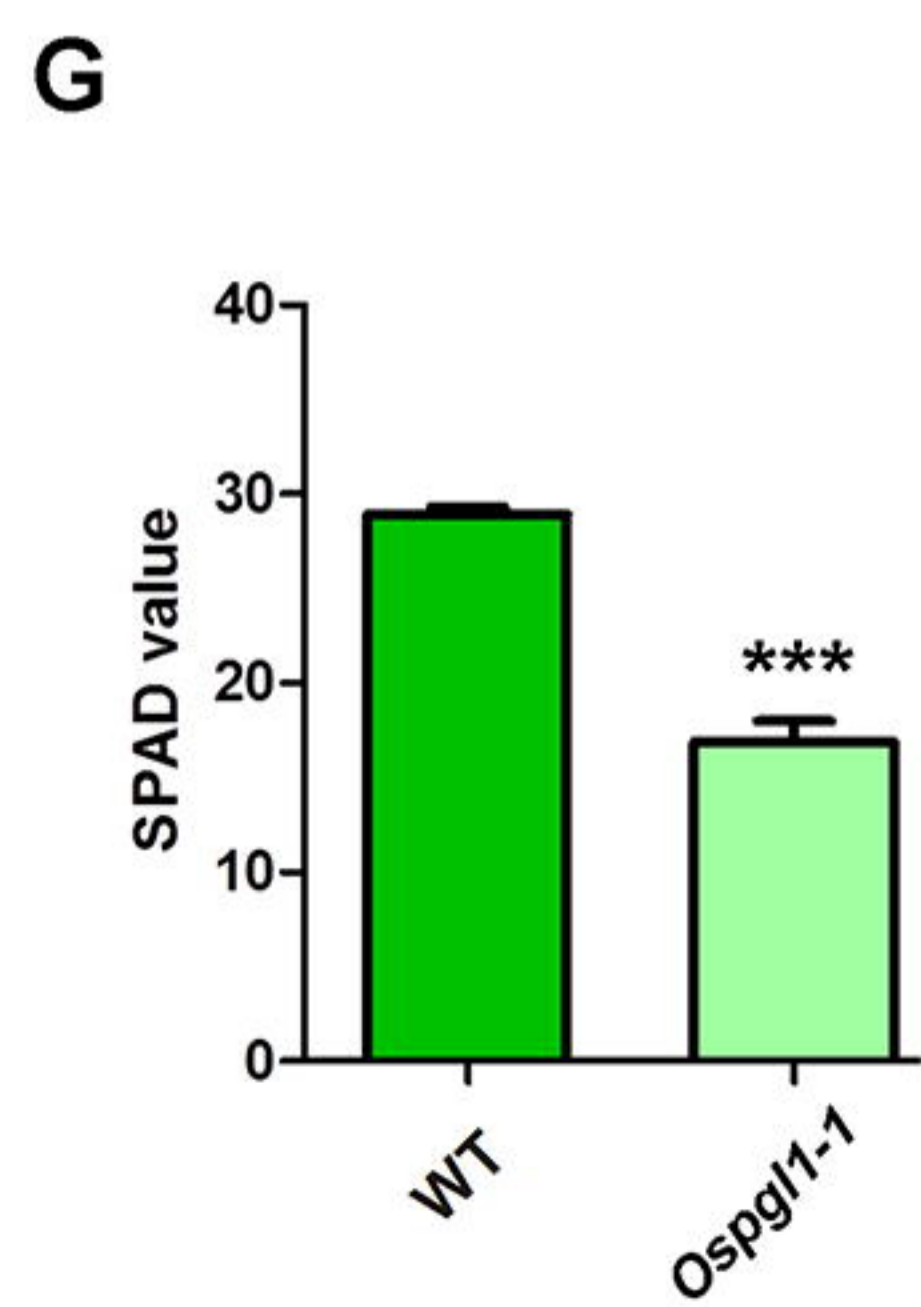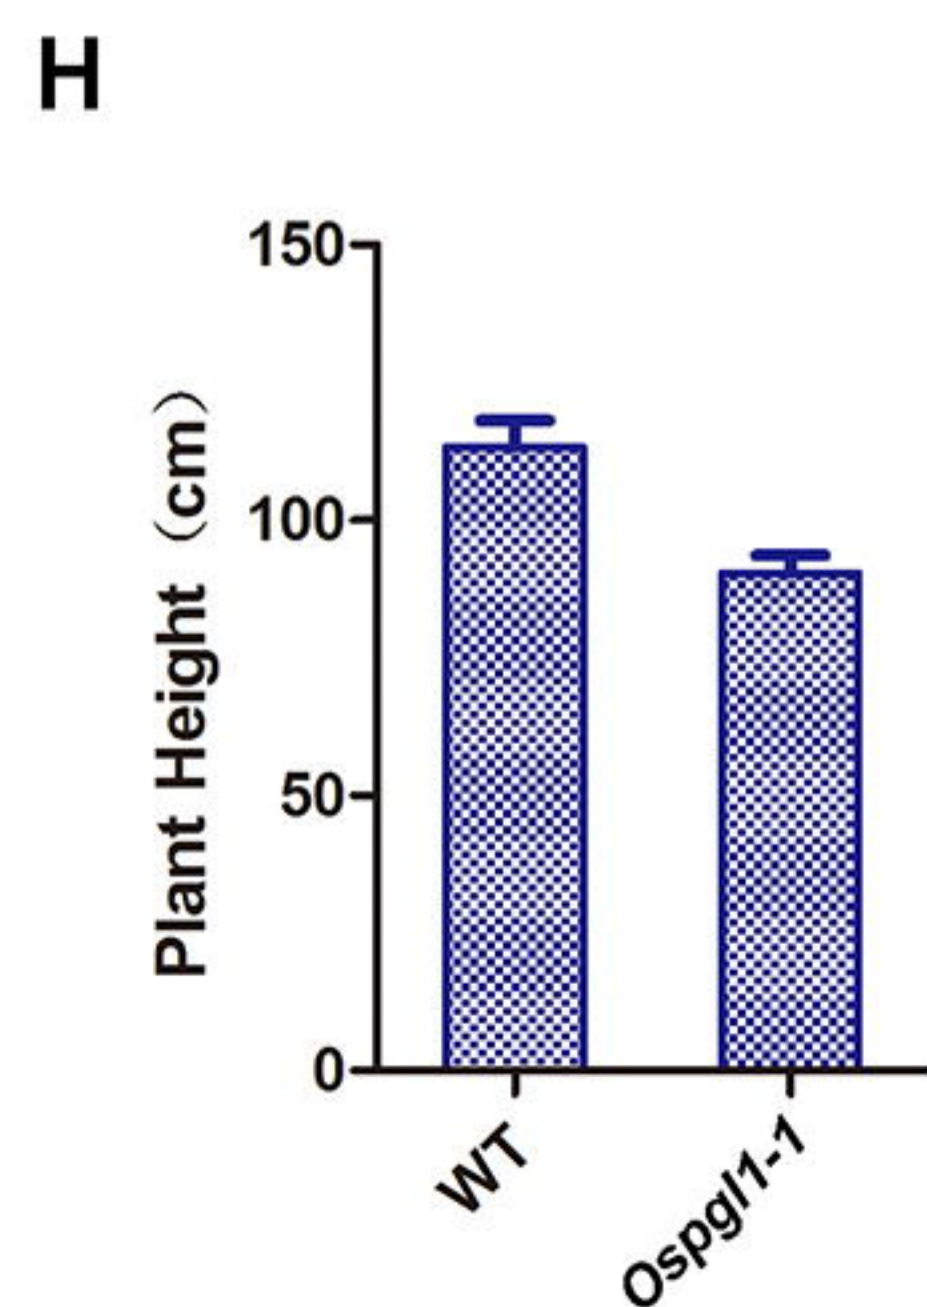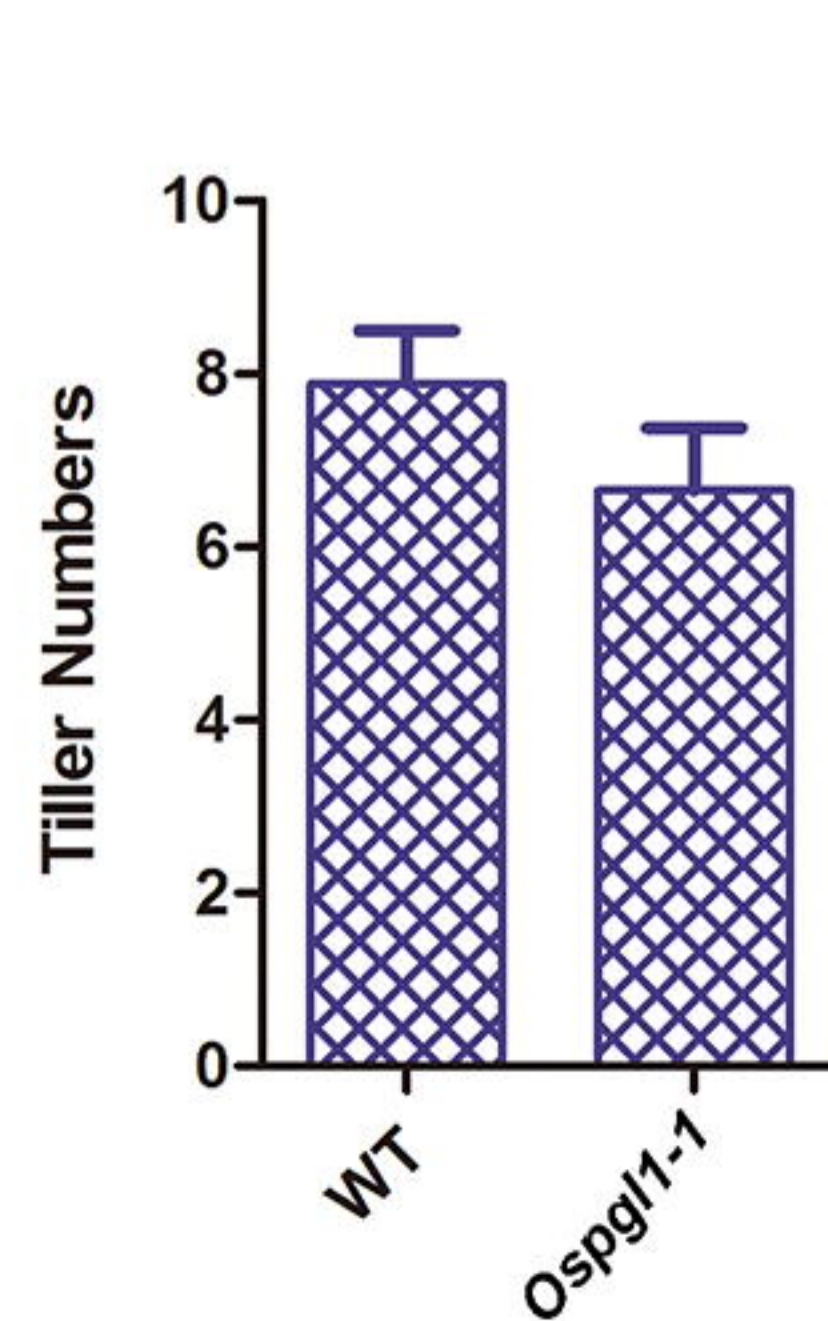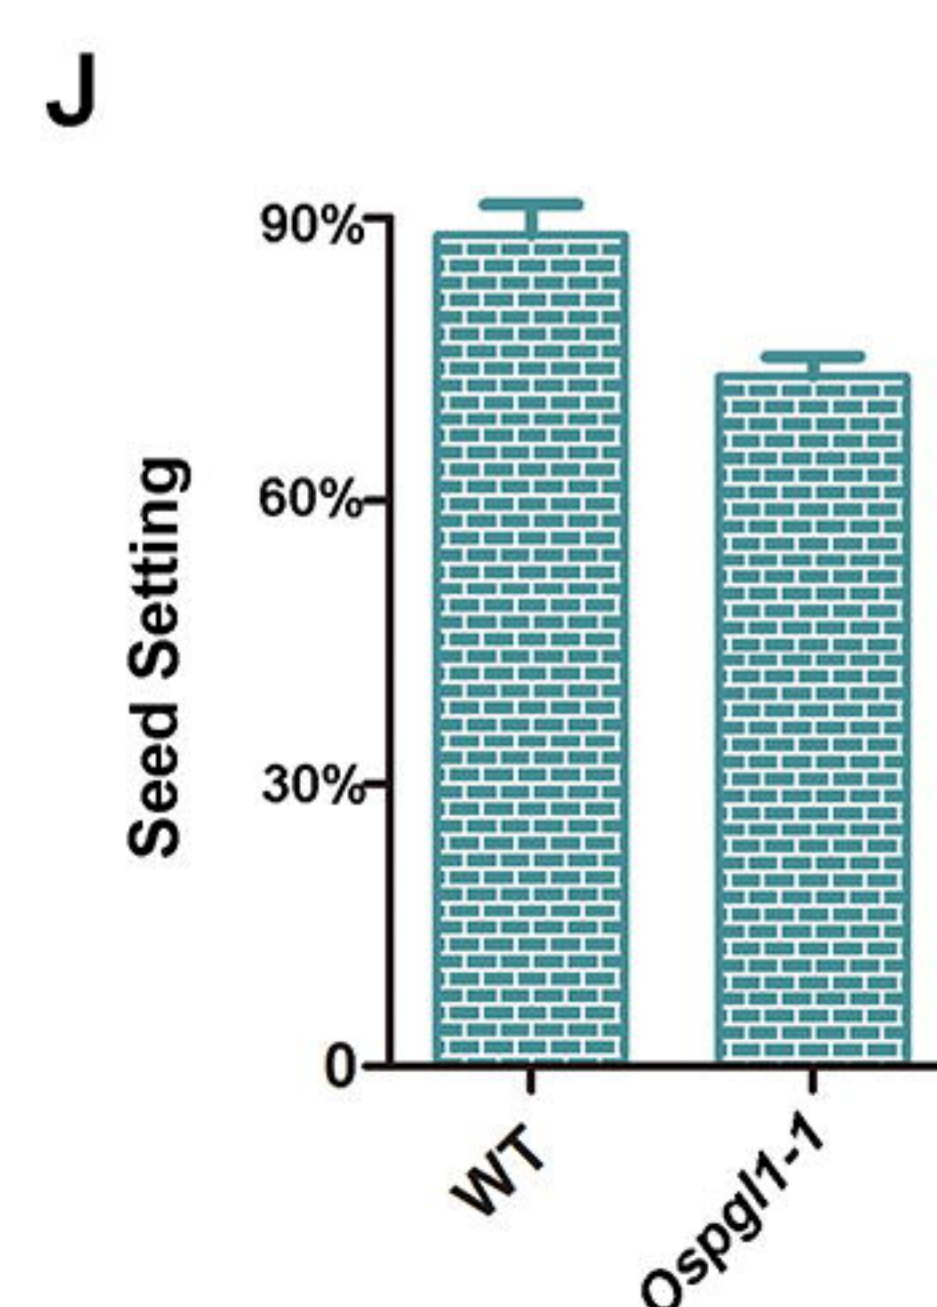

WT

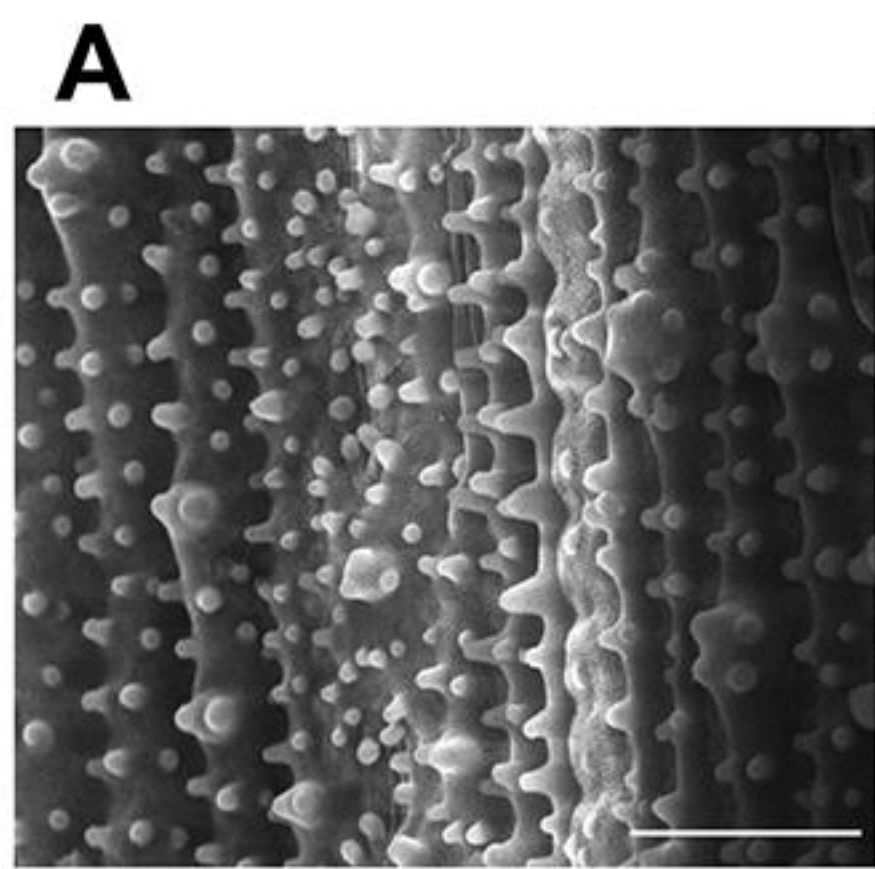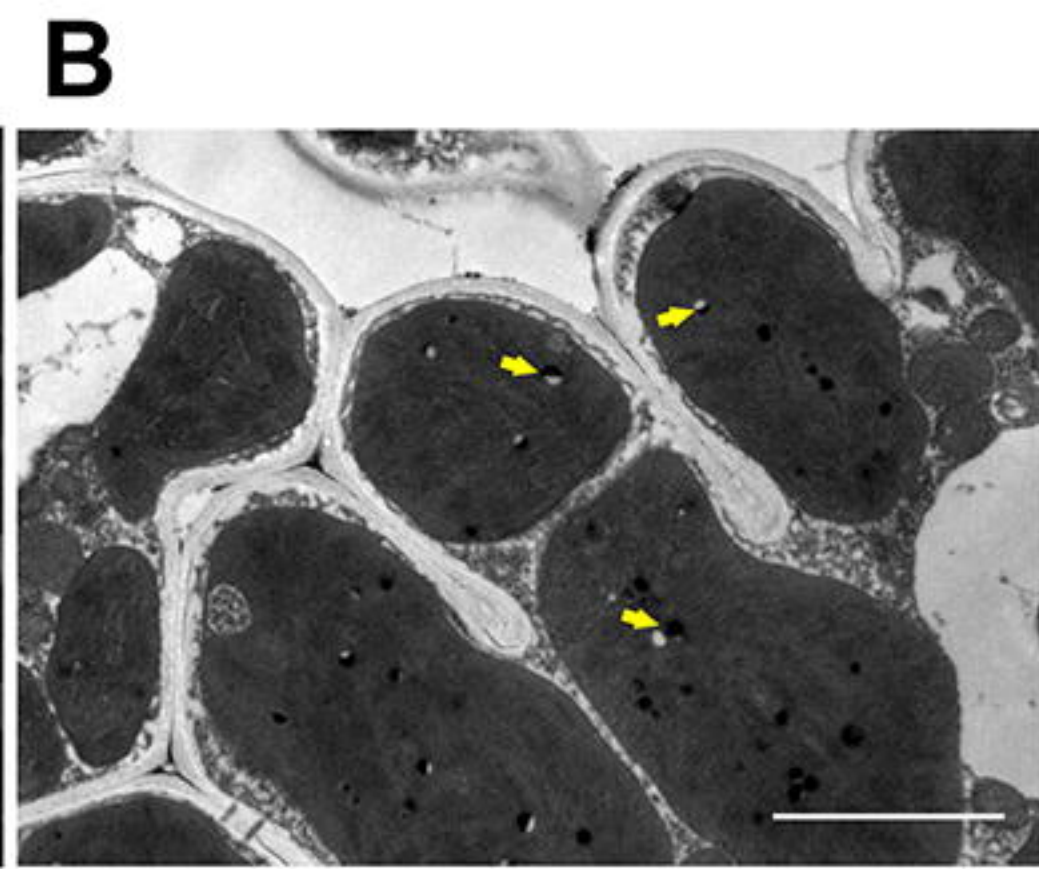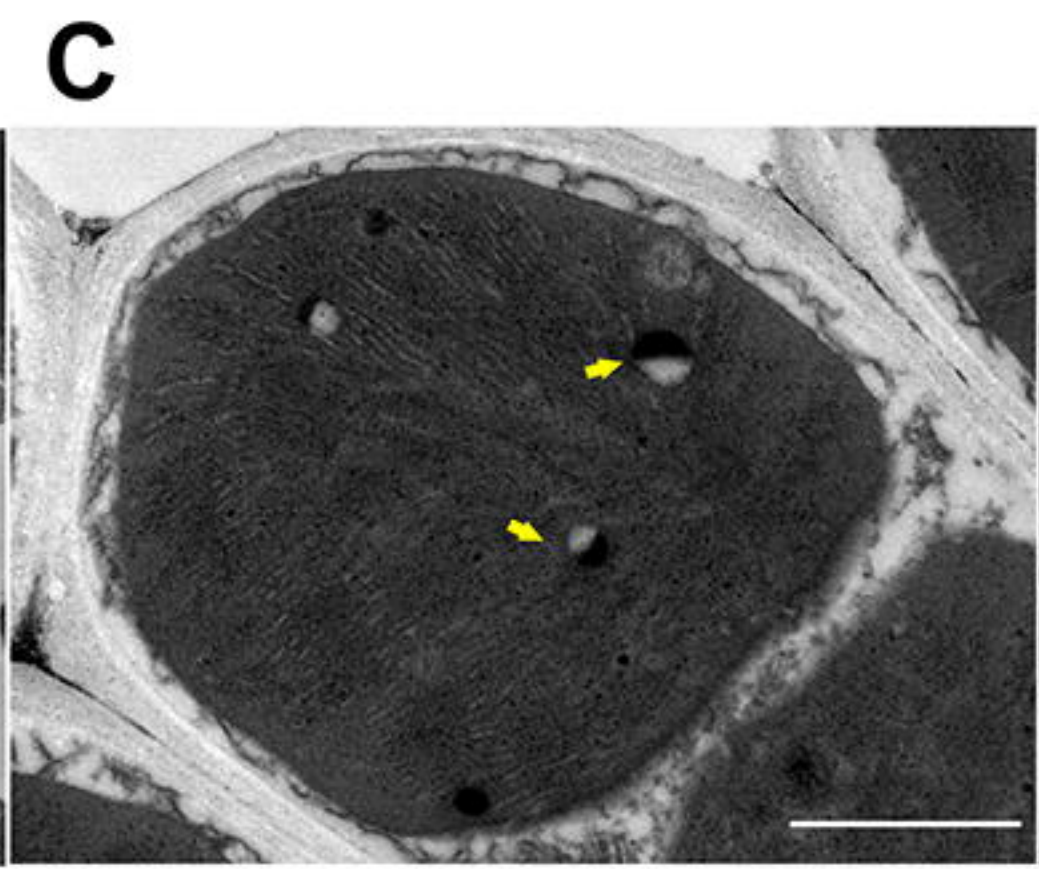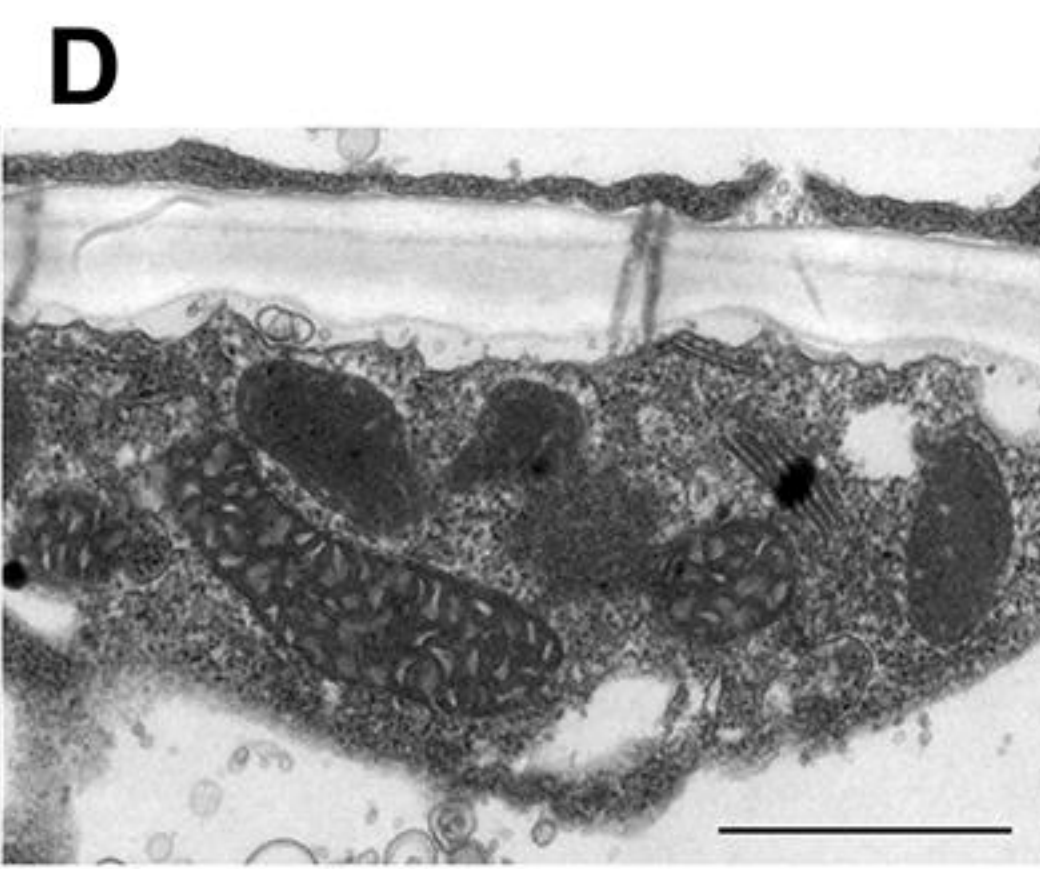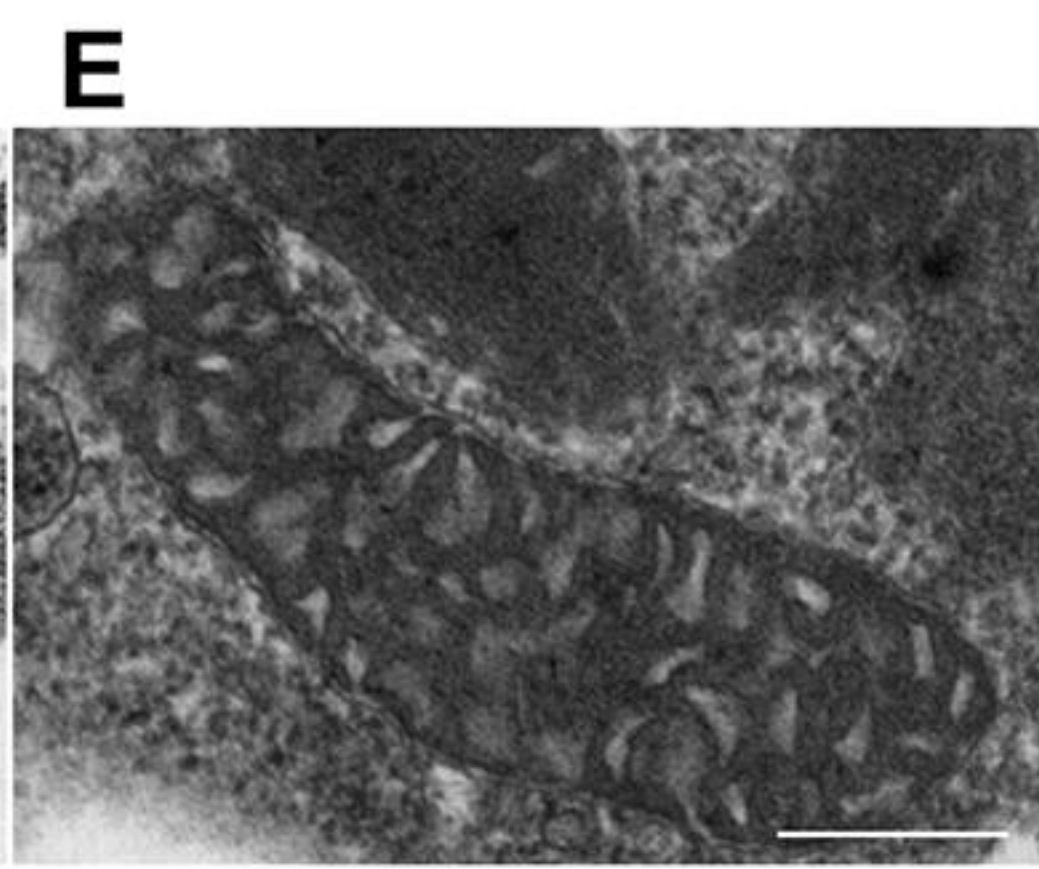

*Ospgl1-1*

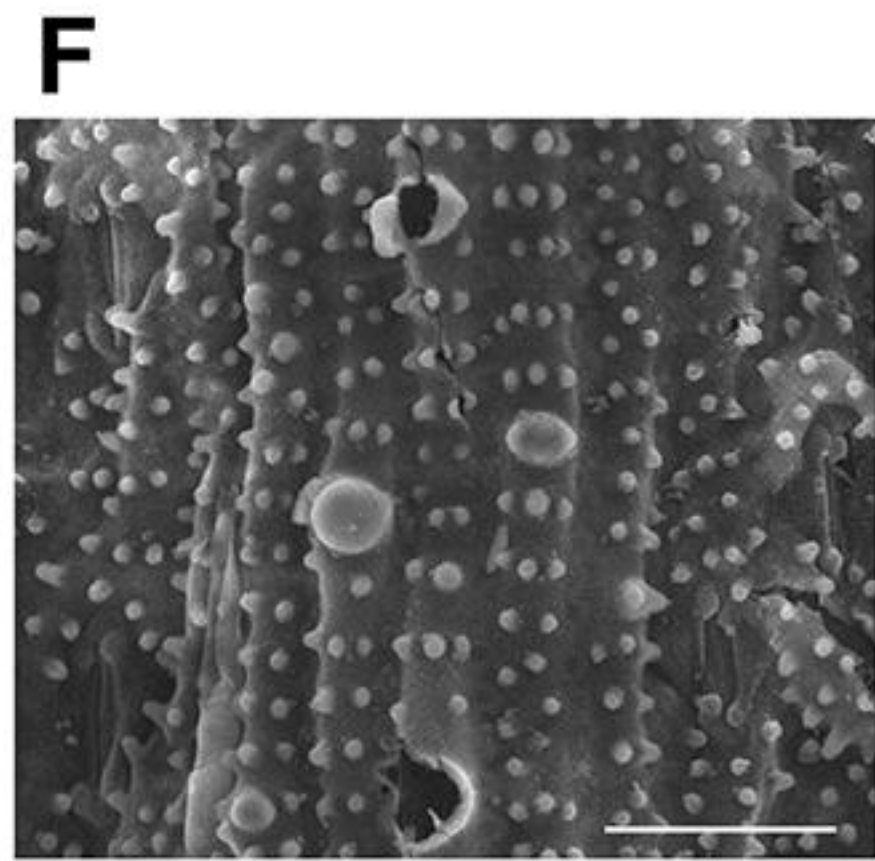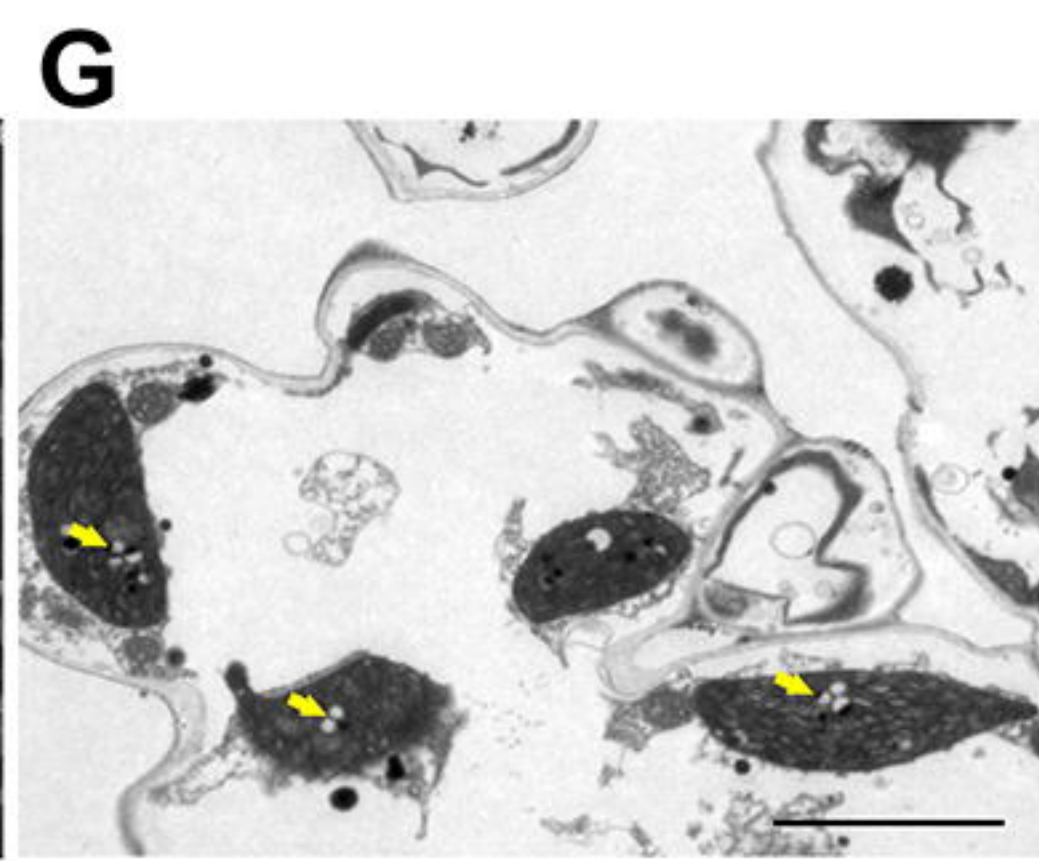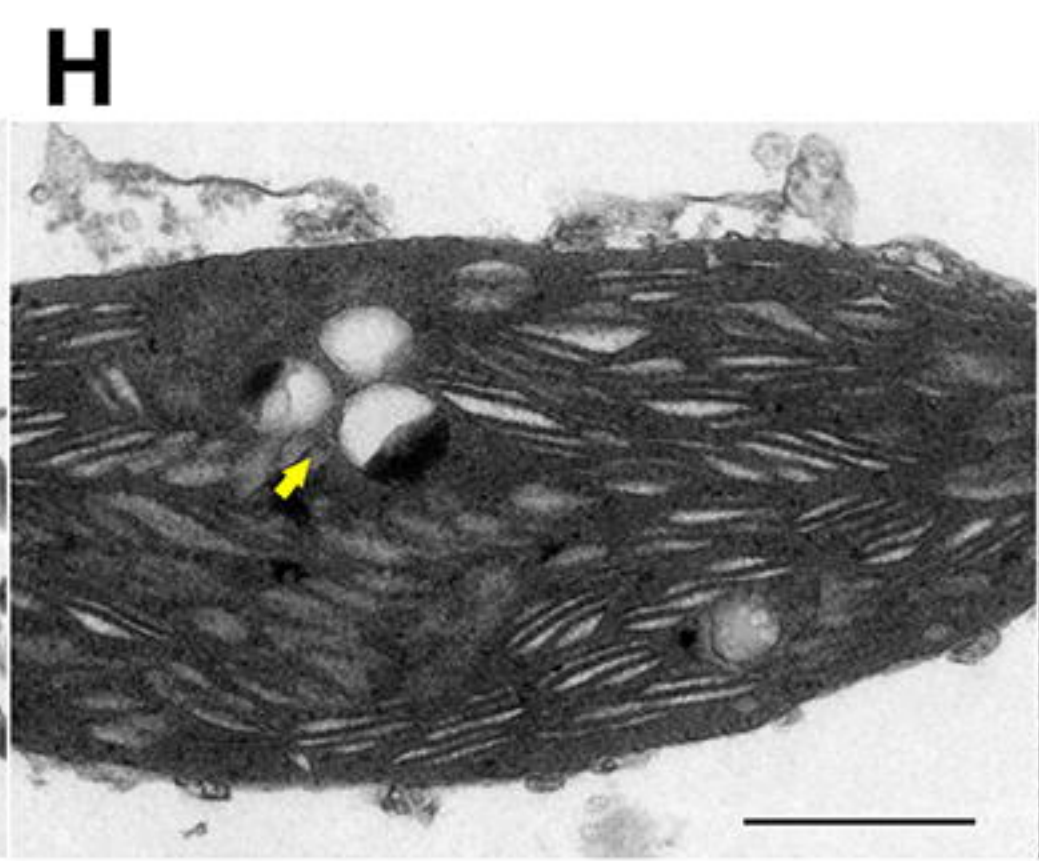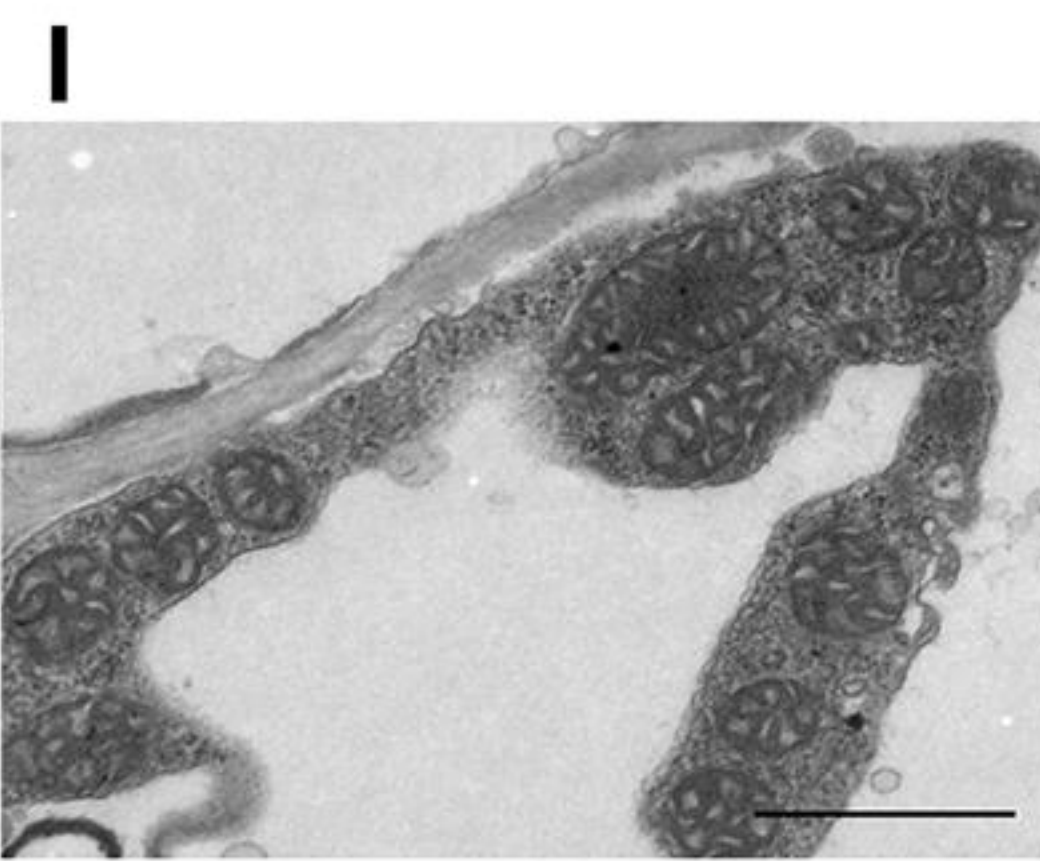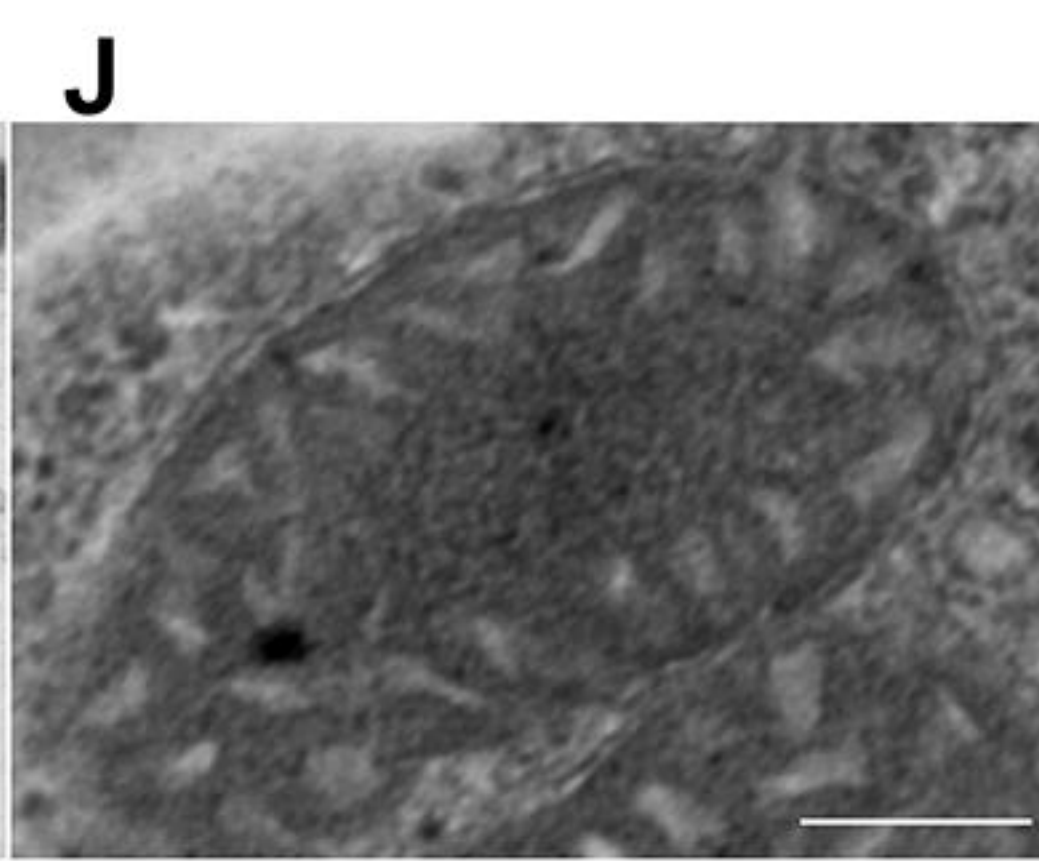

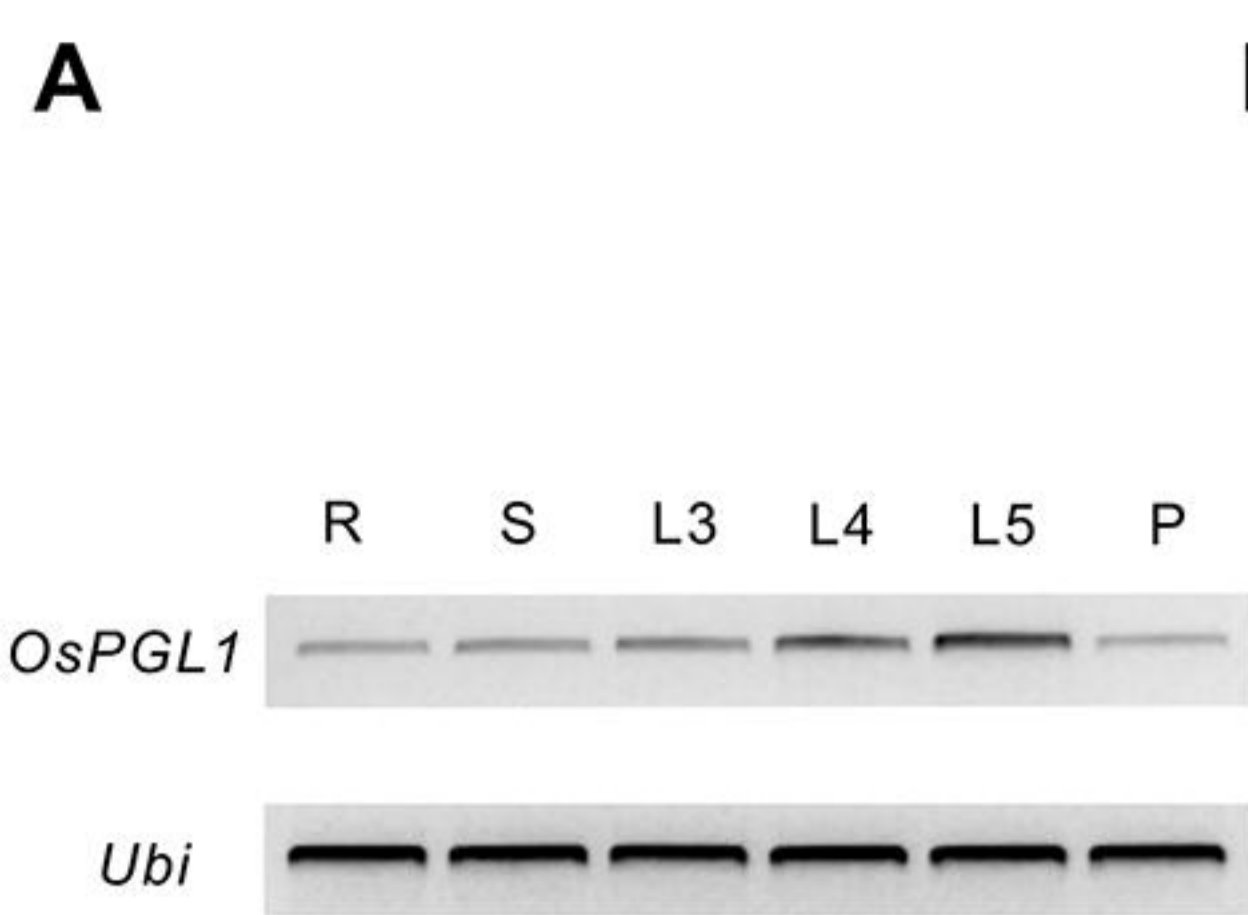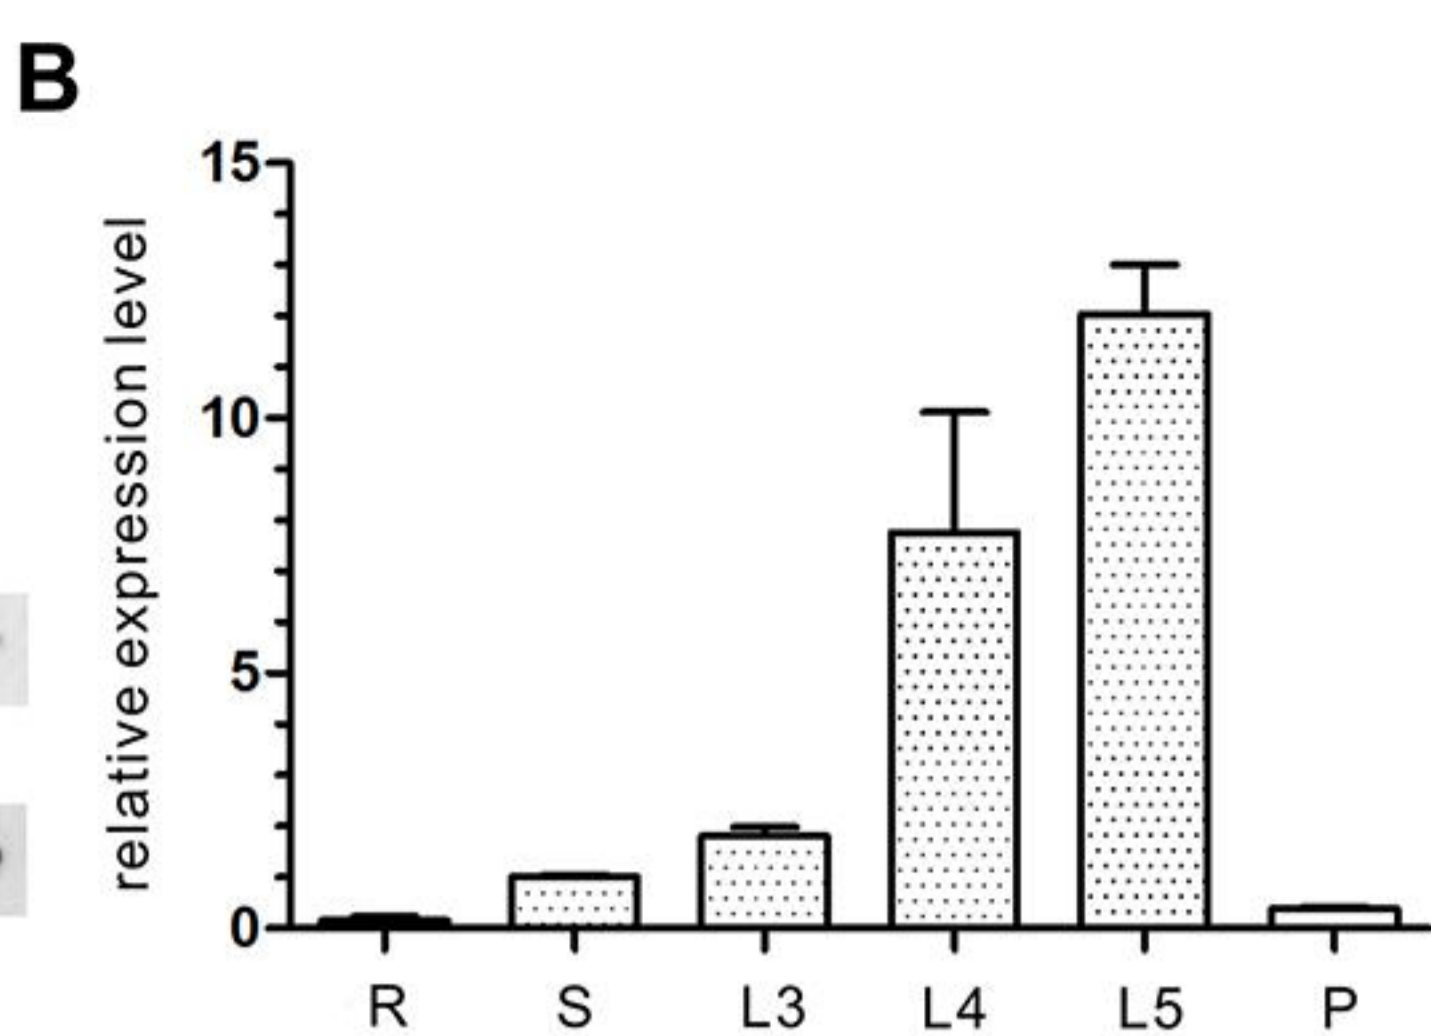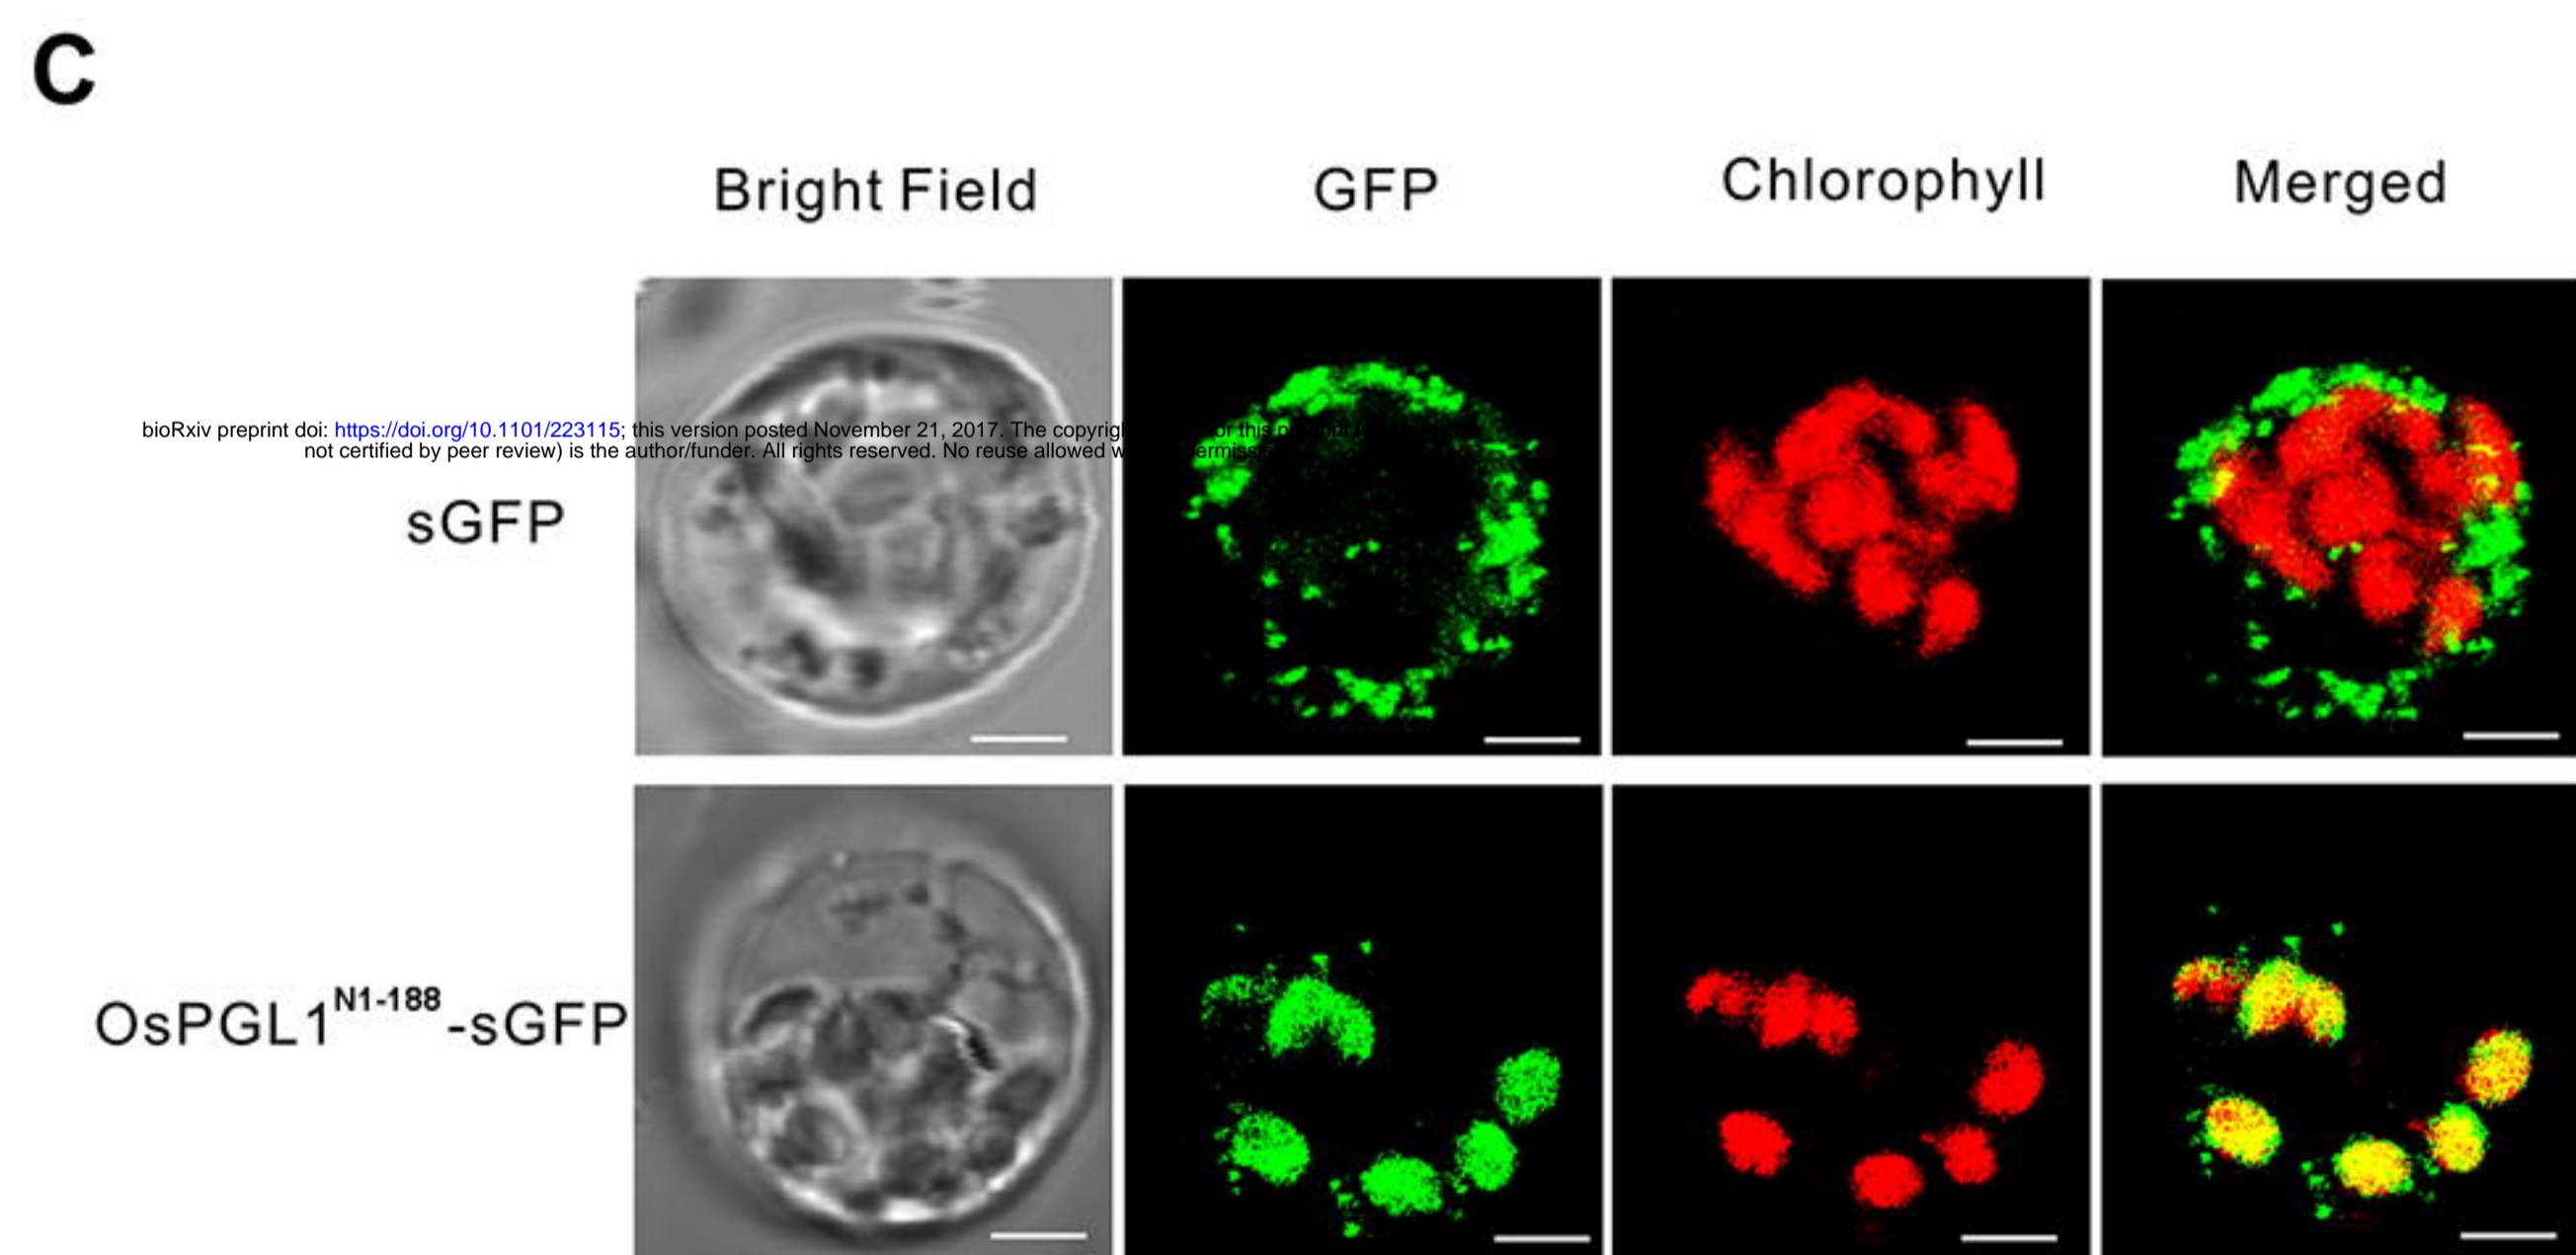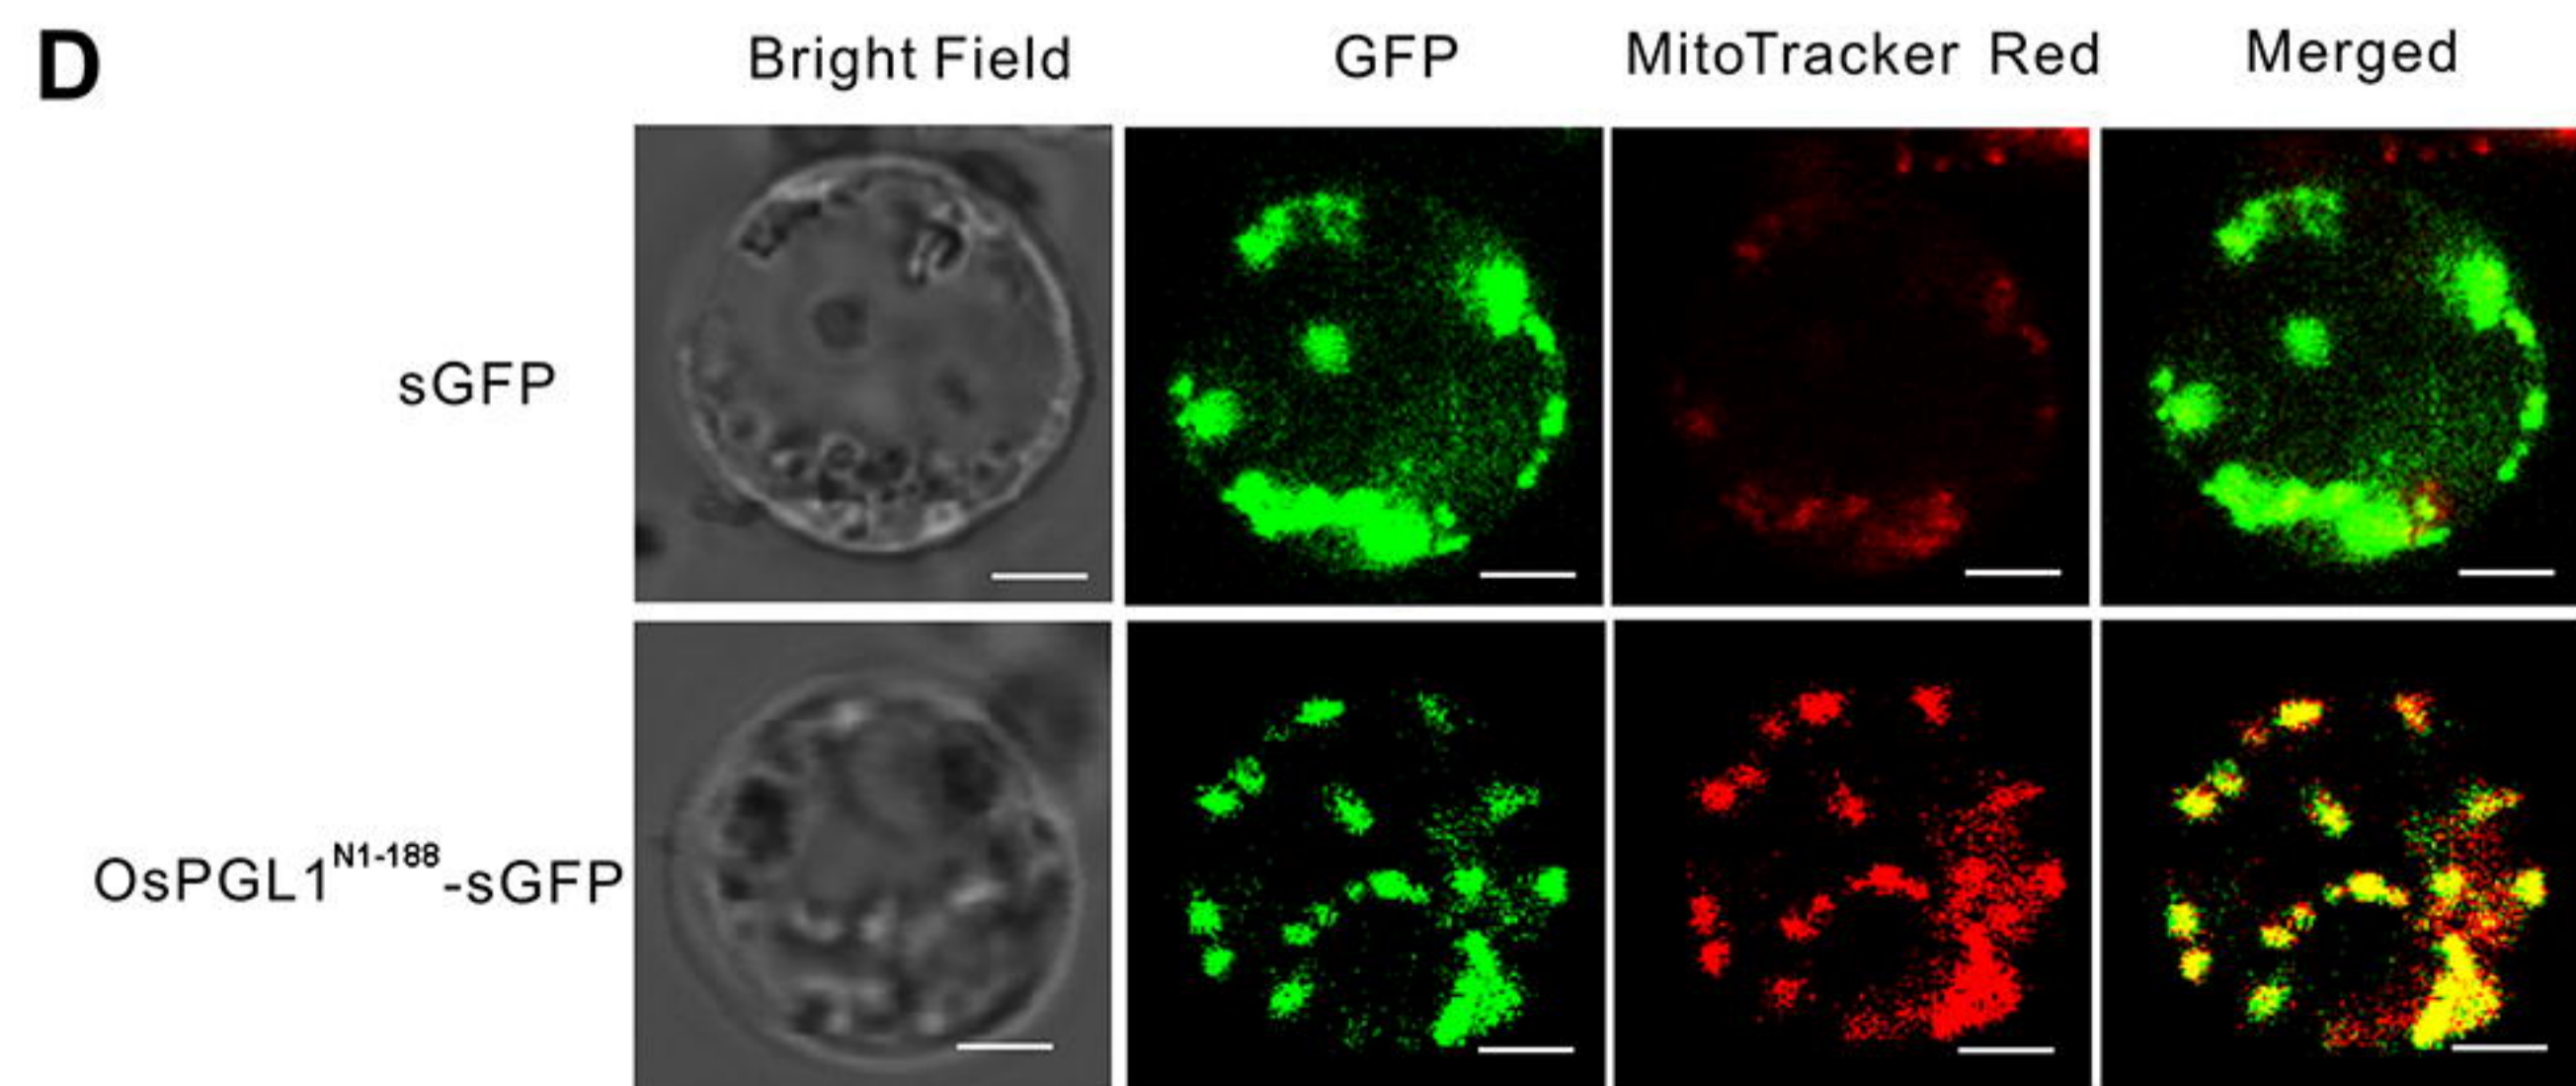

**A**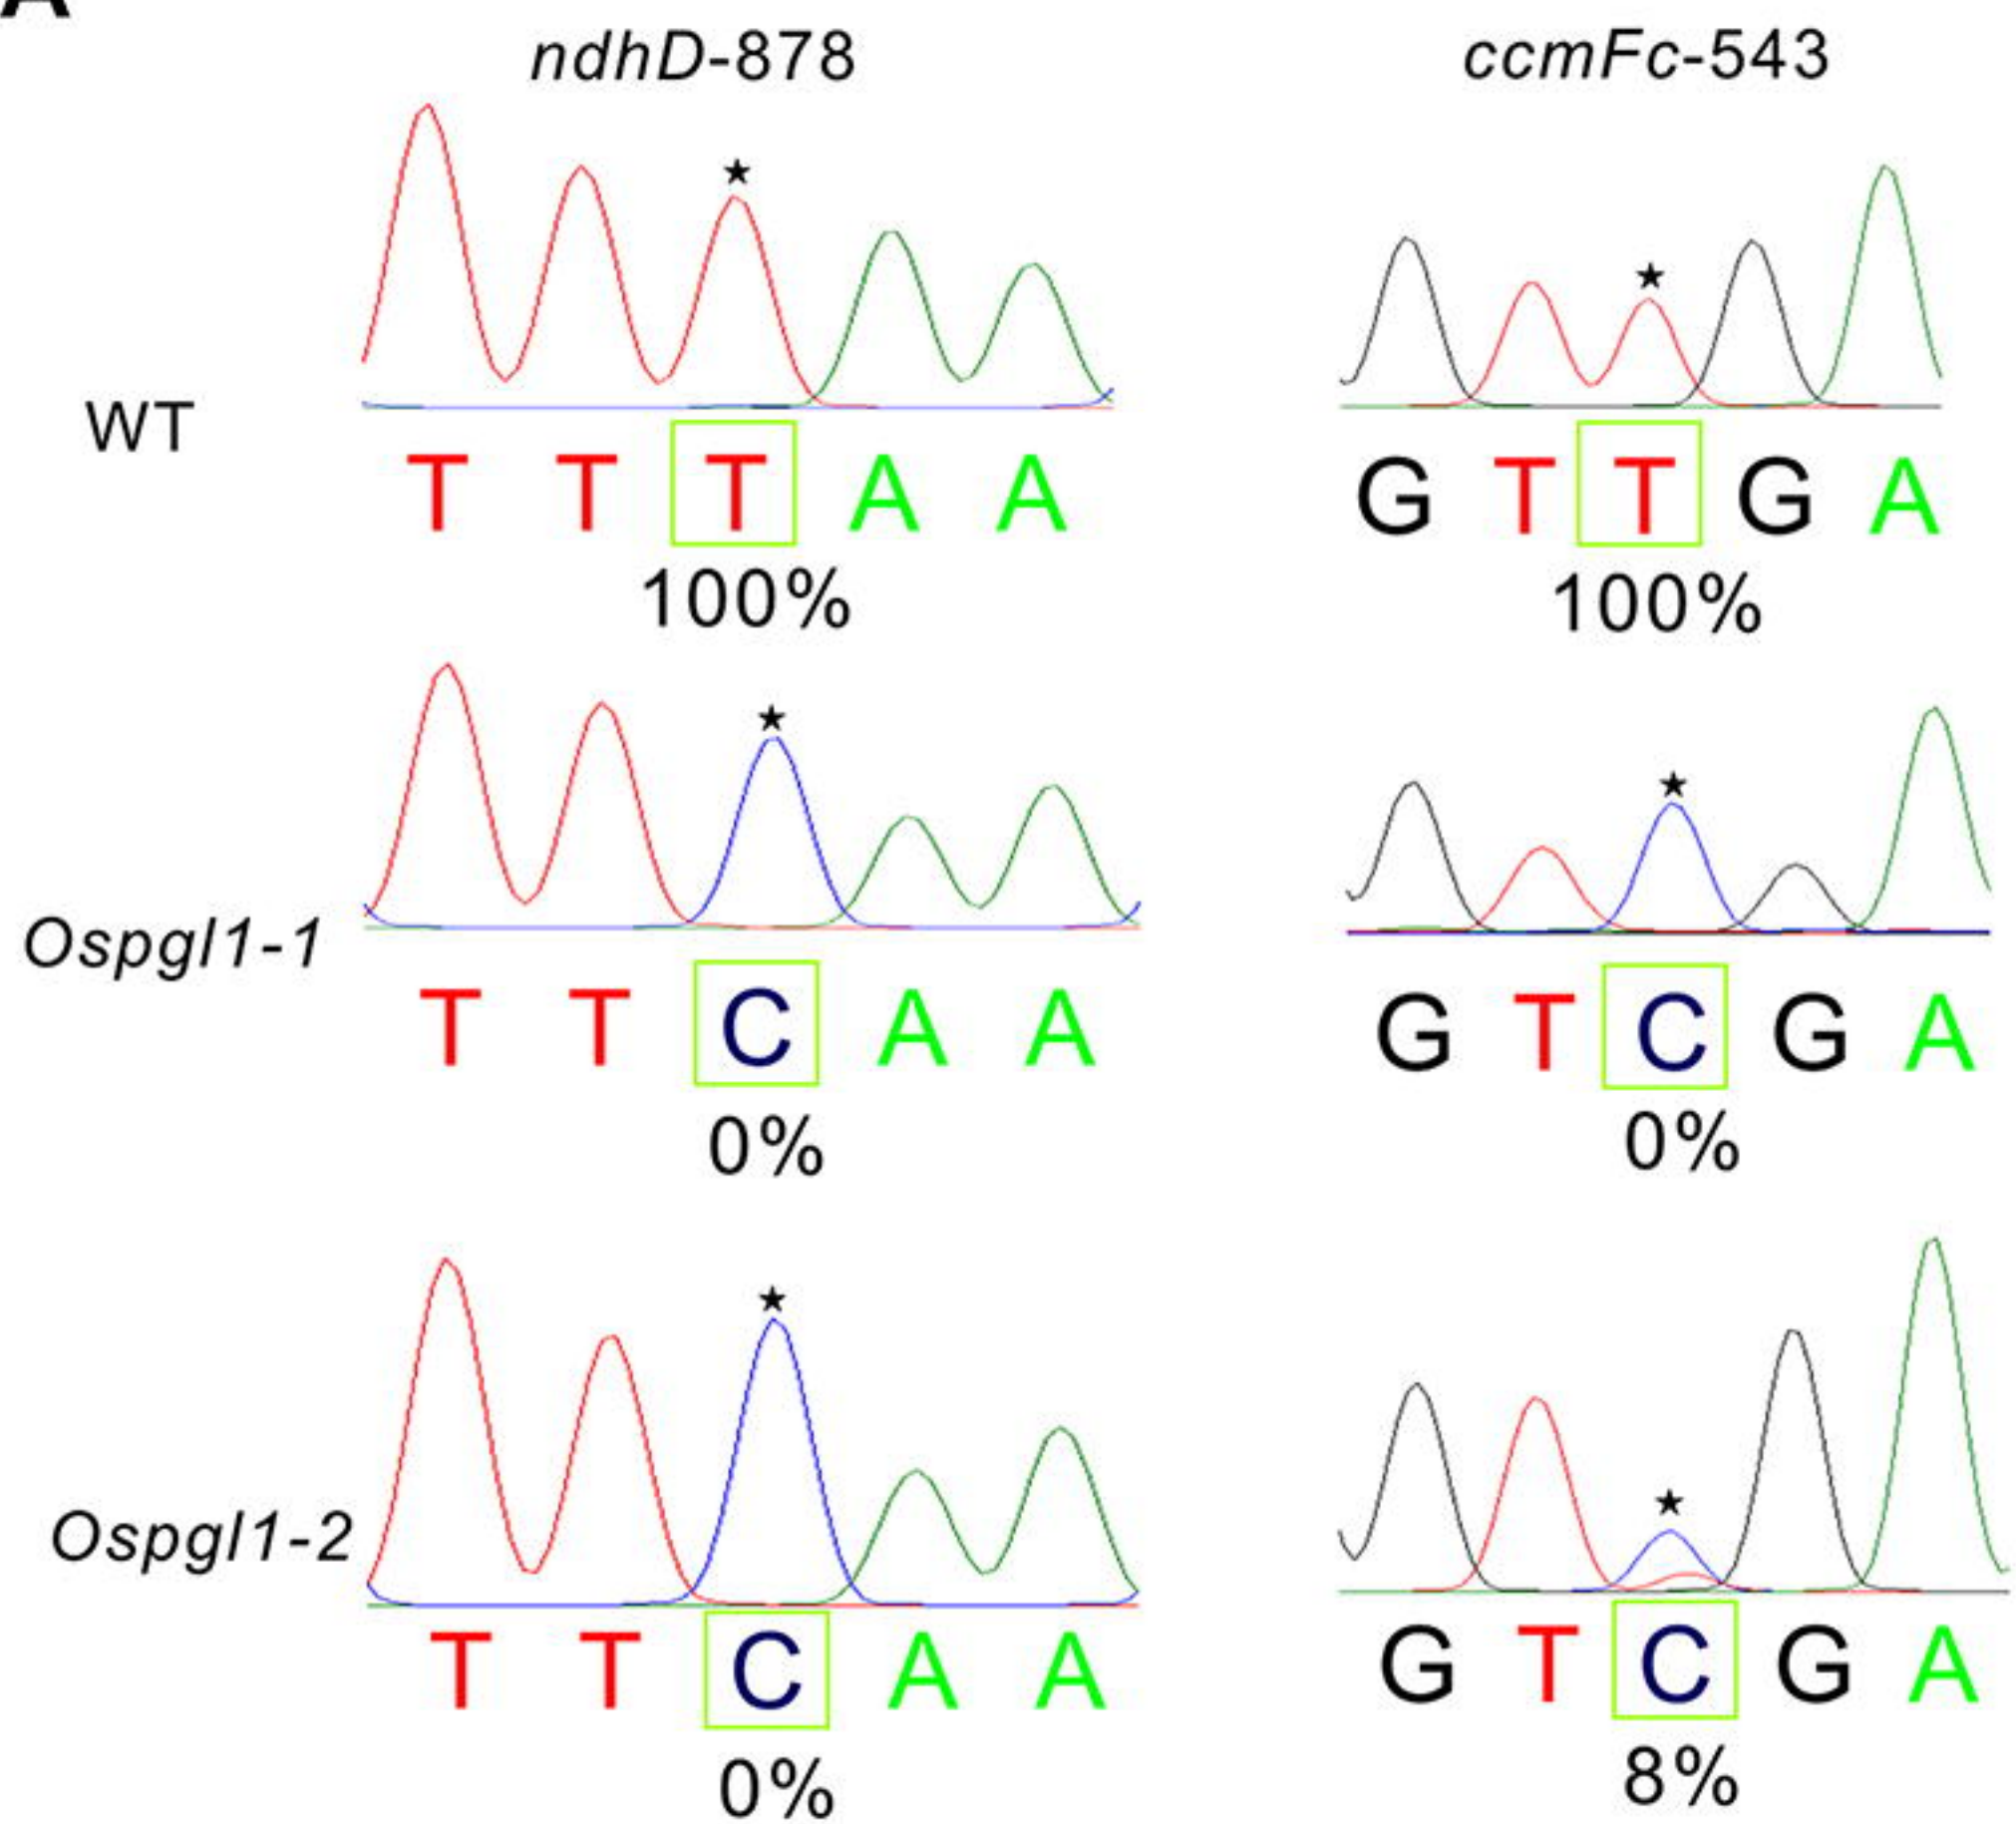**B****Oryza sativa****Zea mays****Arabidopsis thaliana****Nicotiana tabacum****Brassica napus**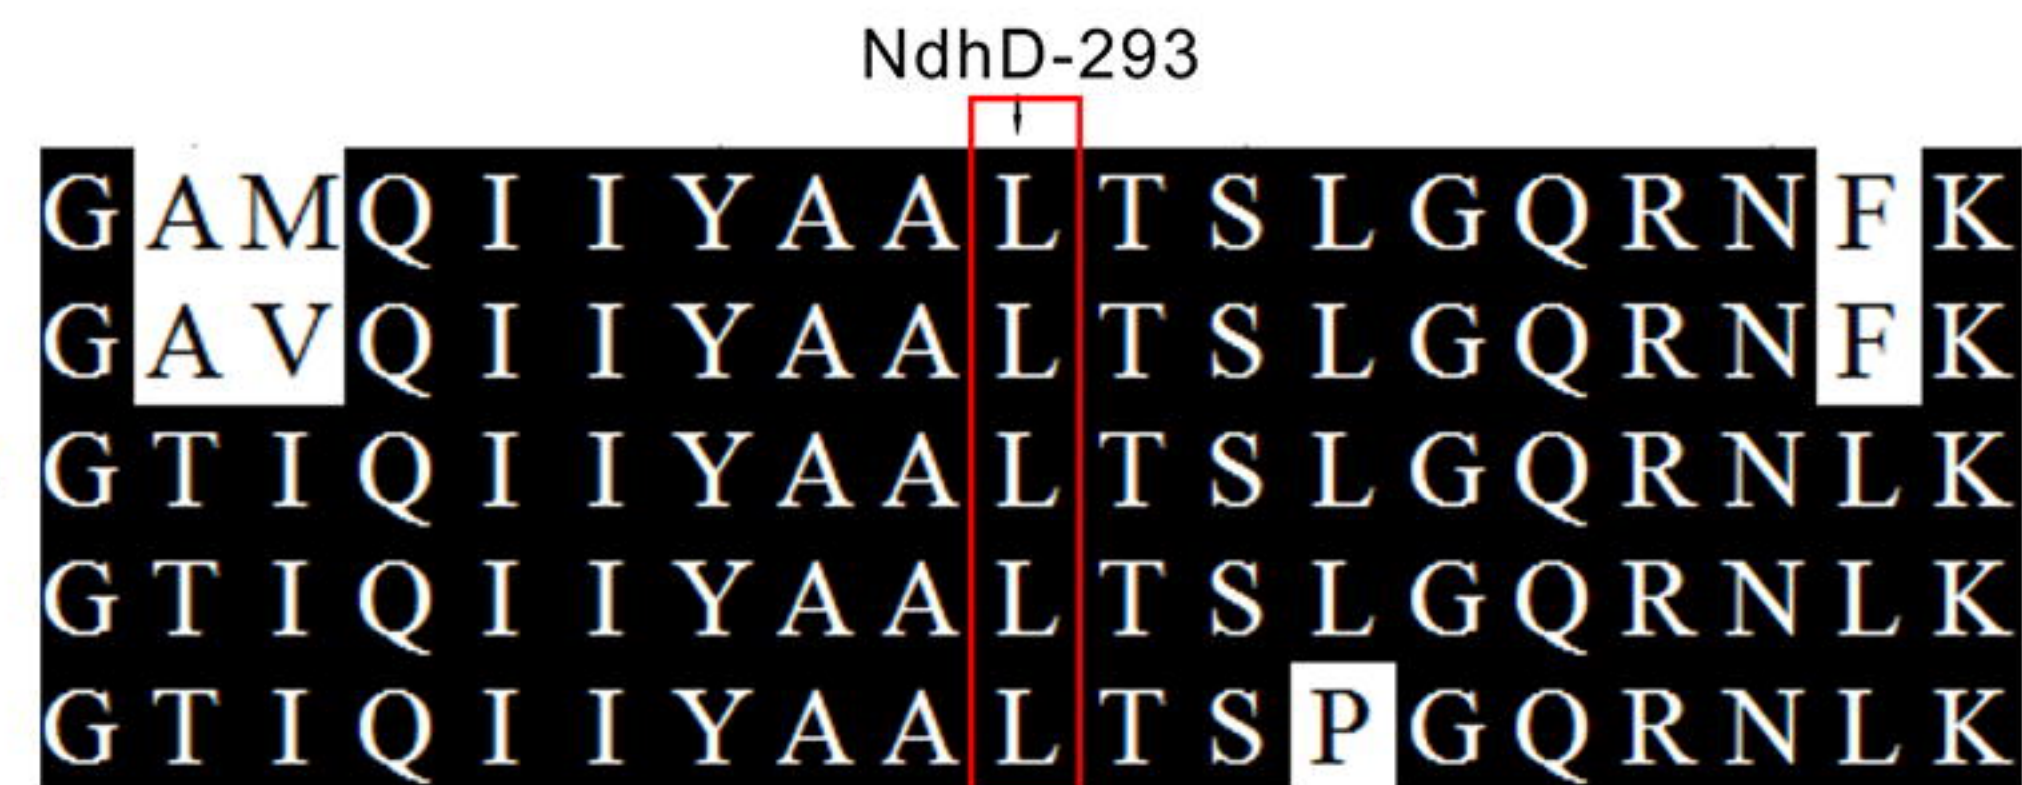**Oryza sativa****Zea mays****Arabidopsis thaliana****Nicotiana tabacum****Brassica napus**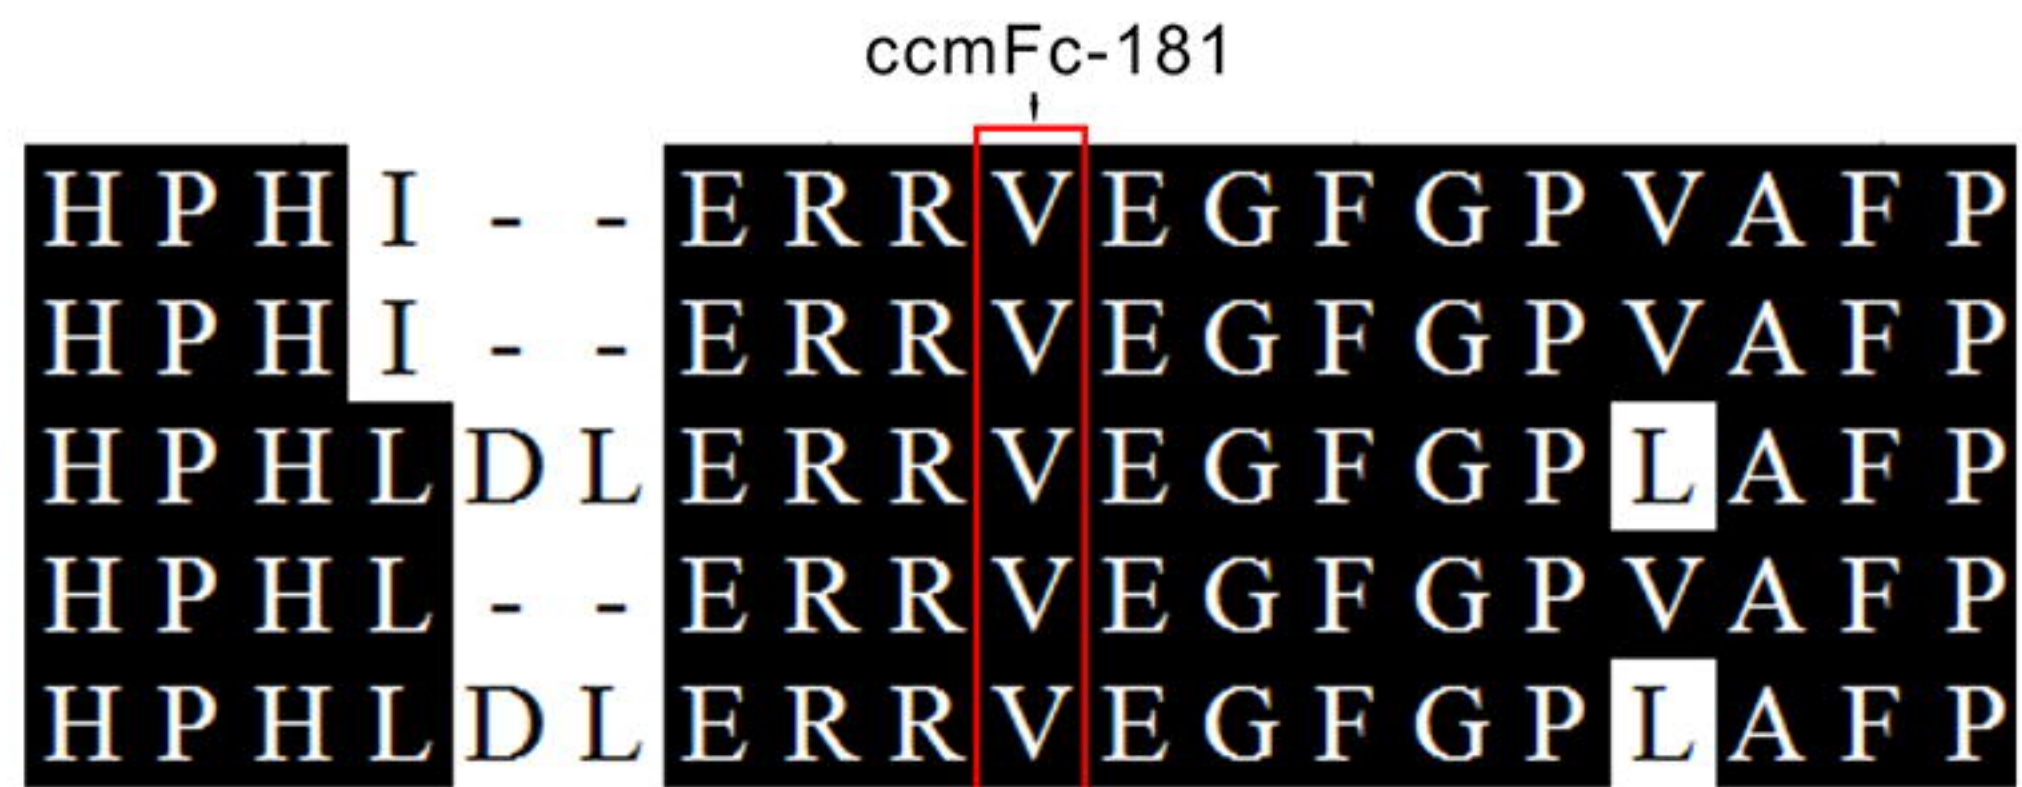

**A**

*ndhD*-878  
↓

Probe1: AGUGAUGCAAUAAUCUAUGCAGCUUCCAACUUCUC

*ccmFc*-543  
↓

Probe2: GGGCACCCCCAUUAUAGAAAGAAGGGUCGAAGGUUU

*nad3*-155  
↓

ProbeC: GUAUCUAUUUAGUGAUCAGUCCGCUAGUUUCUUUG

**B**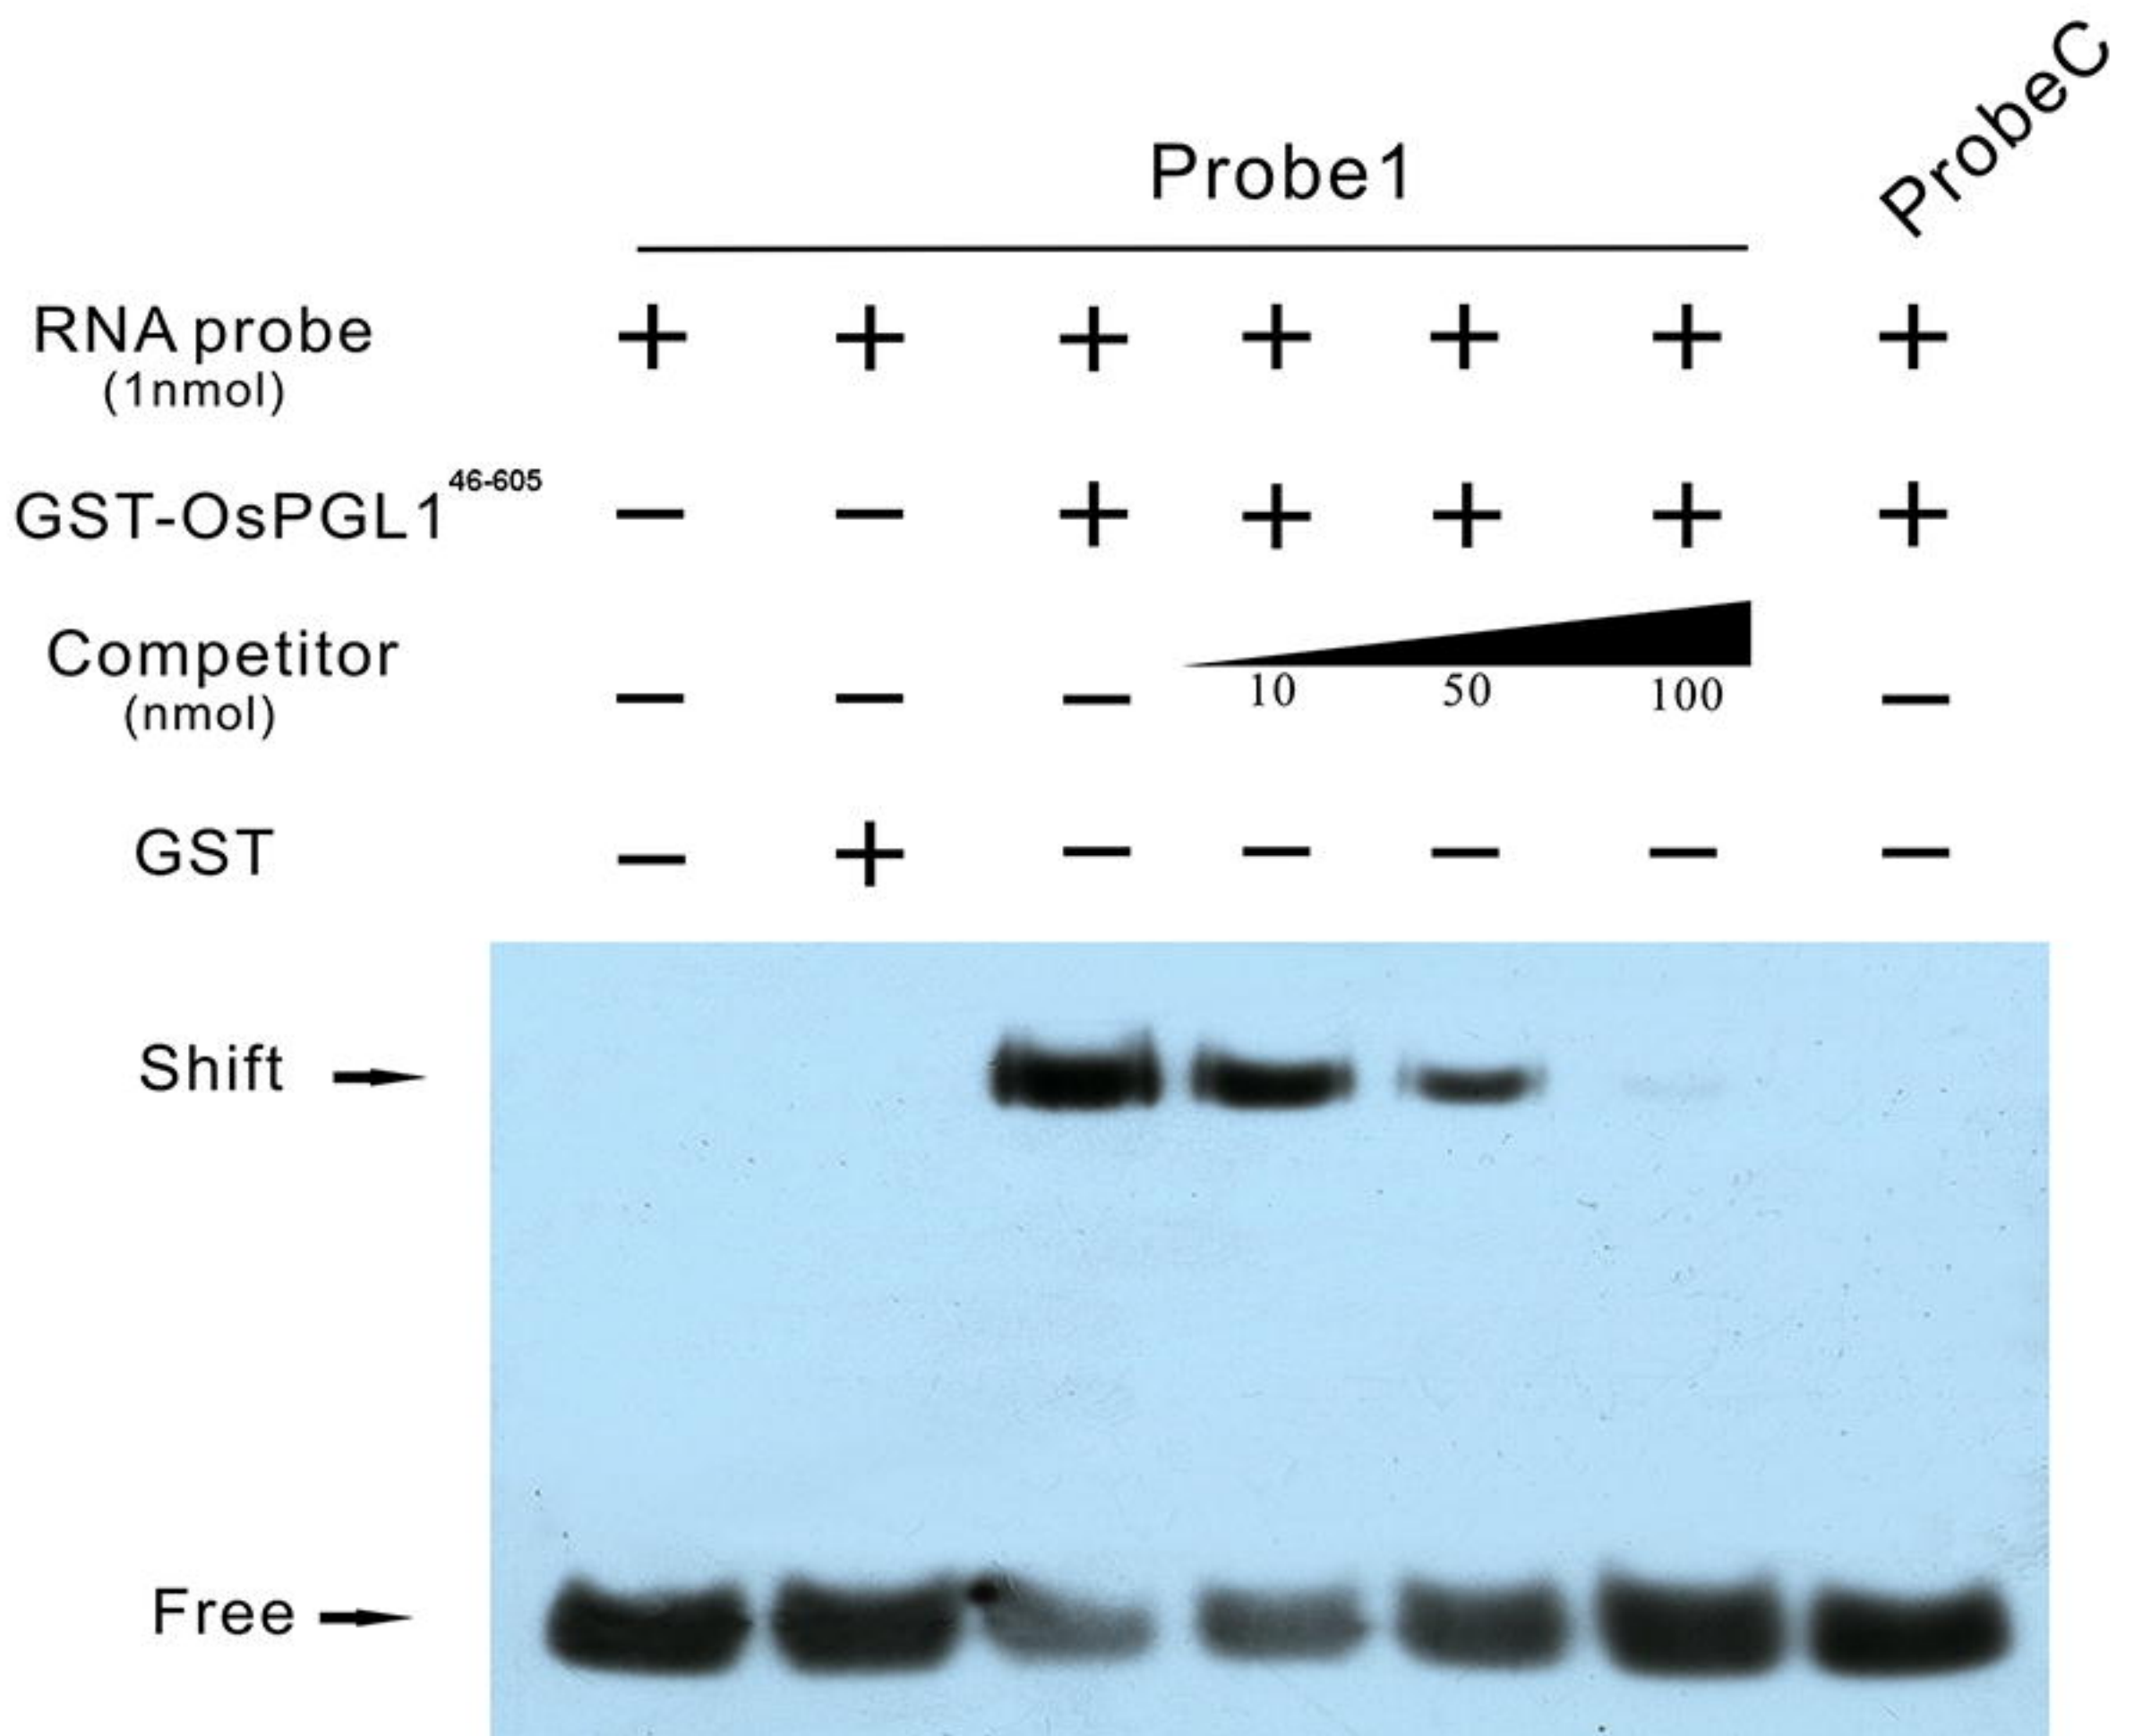**C**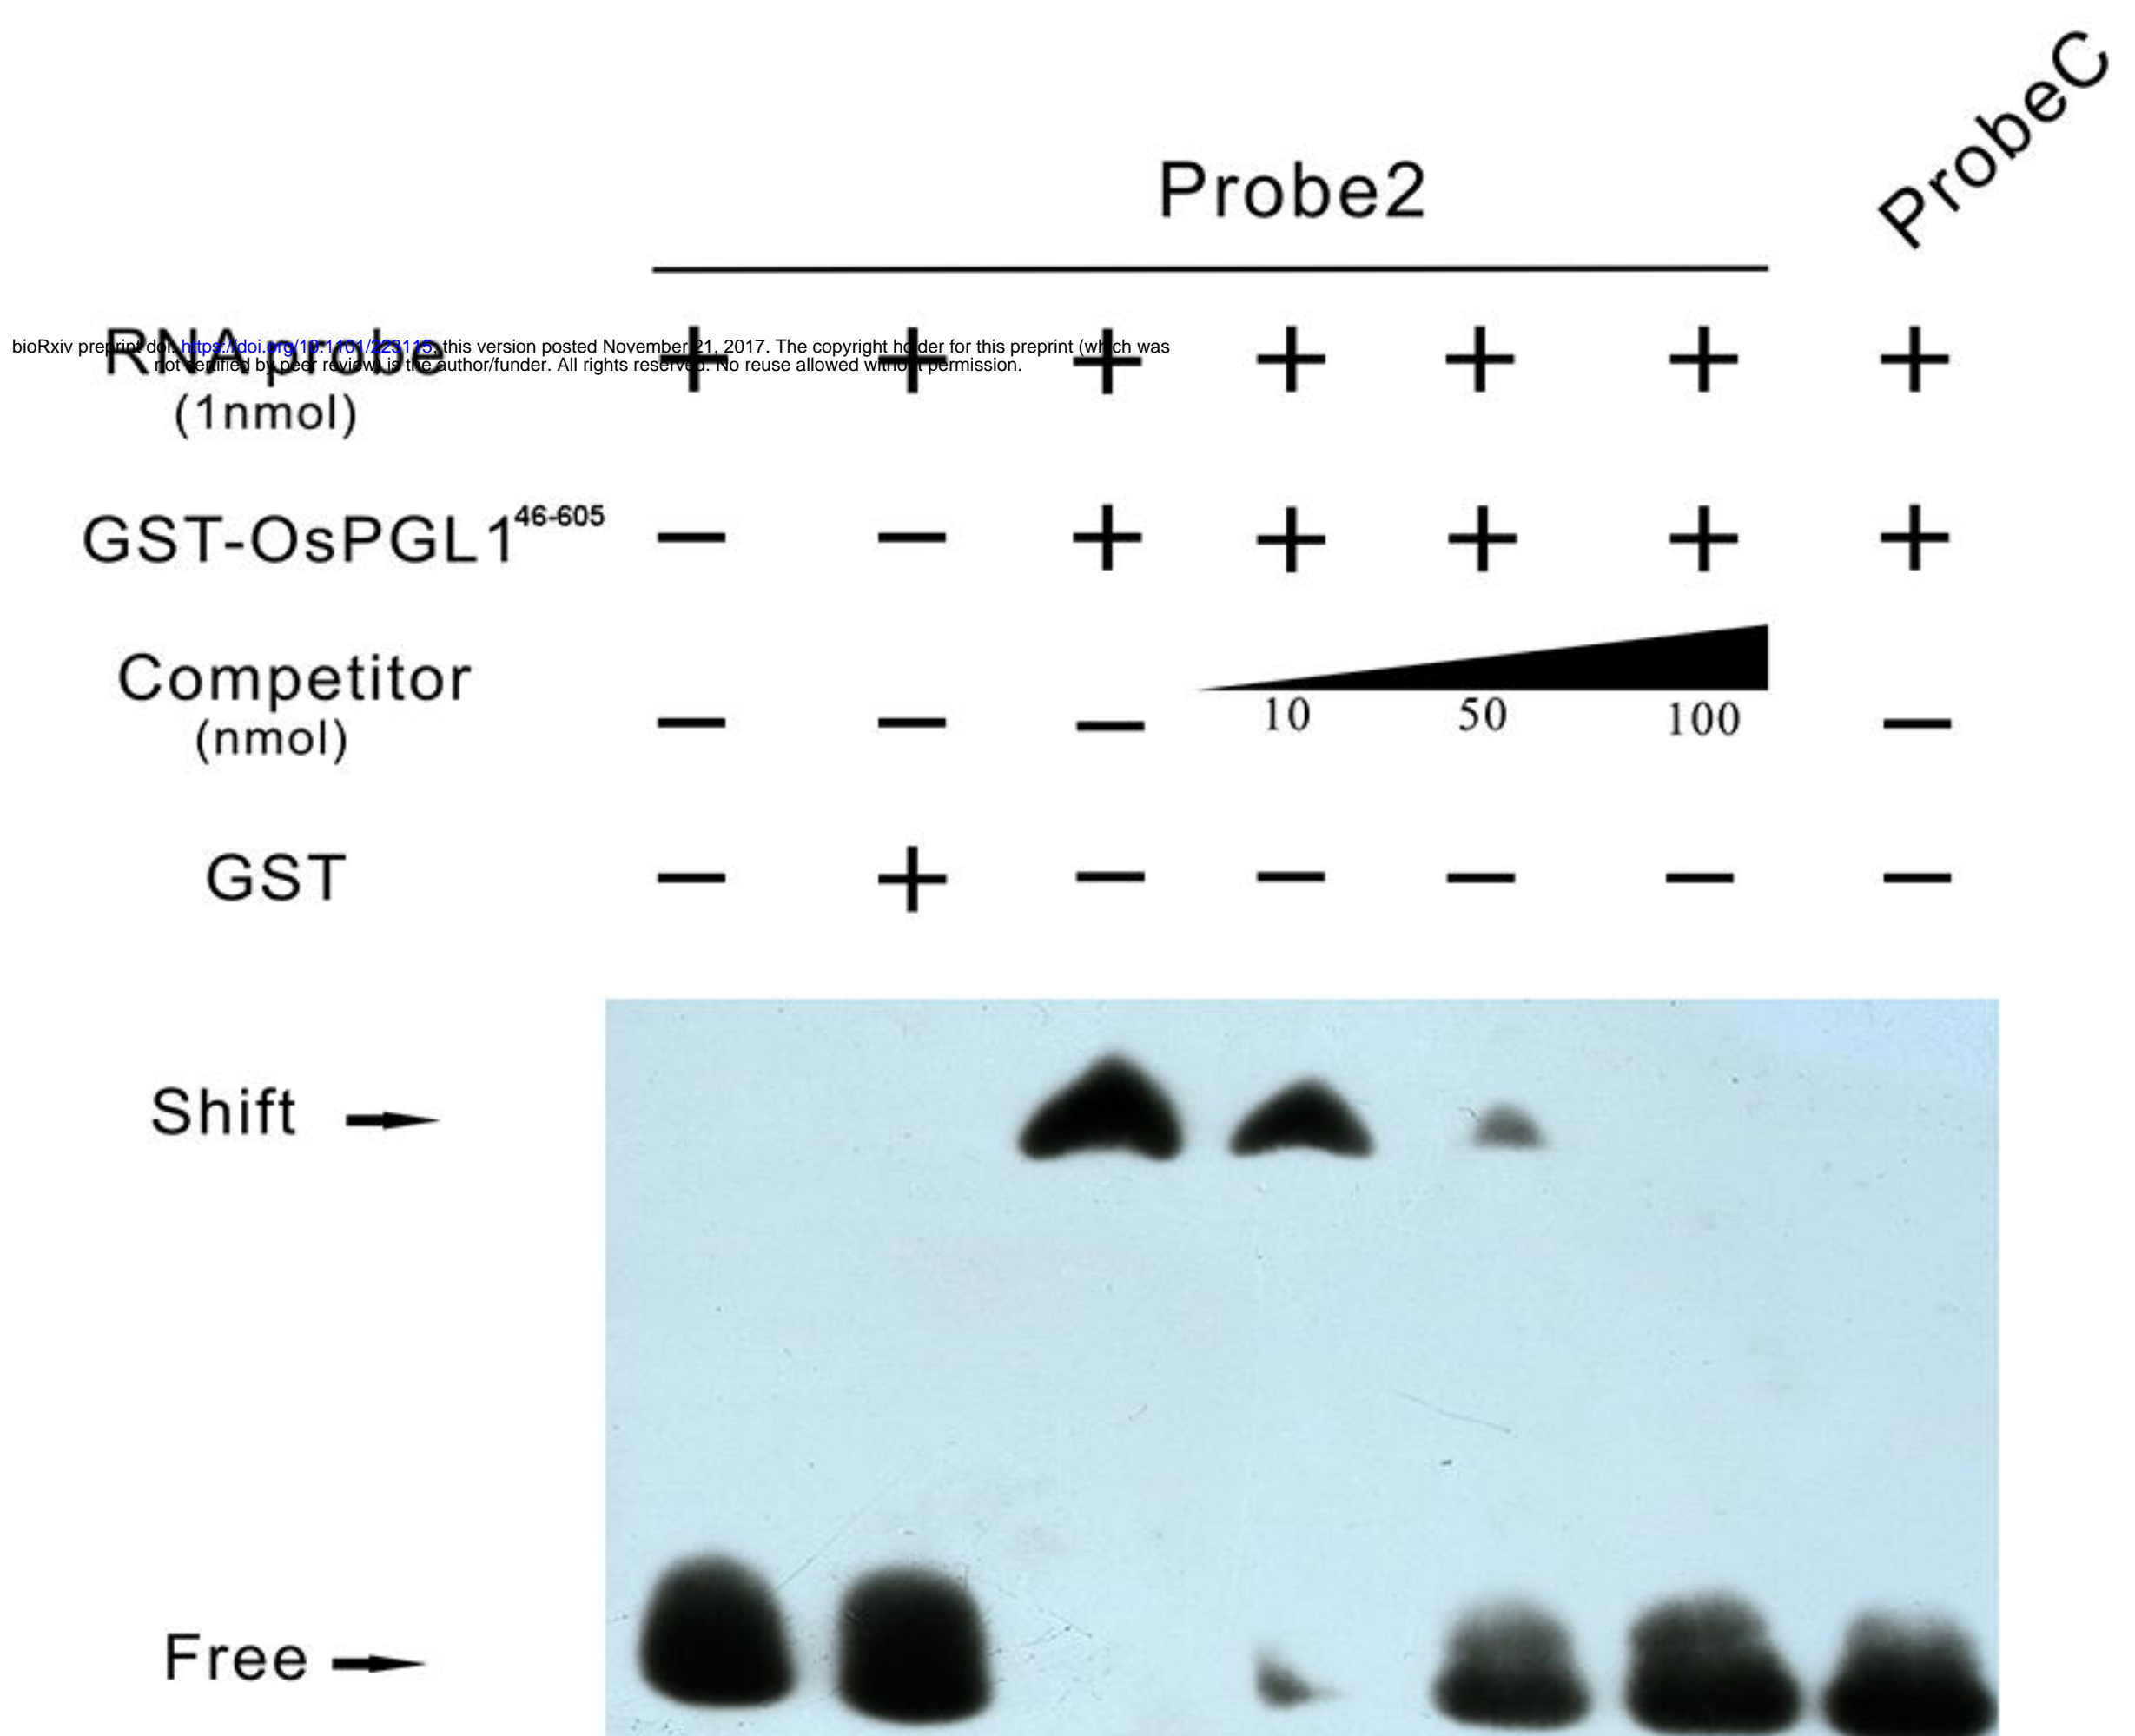

bioRxiv preprint doi: <https://doi.org/10.1101/212112>; this version posted November 21, 2017. The copyright holder for this preprint (which was not certified by peer review) is the author/funder. All rights reserved. No reuse allowed without permission.

A

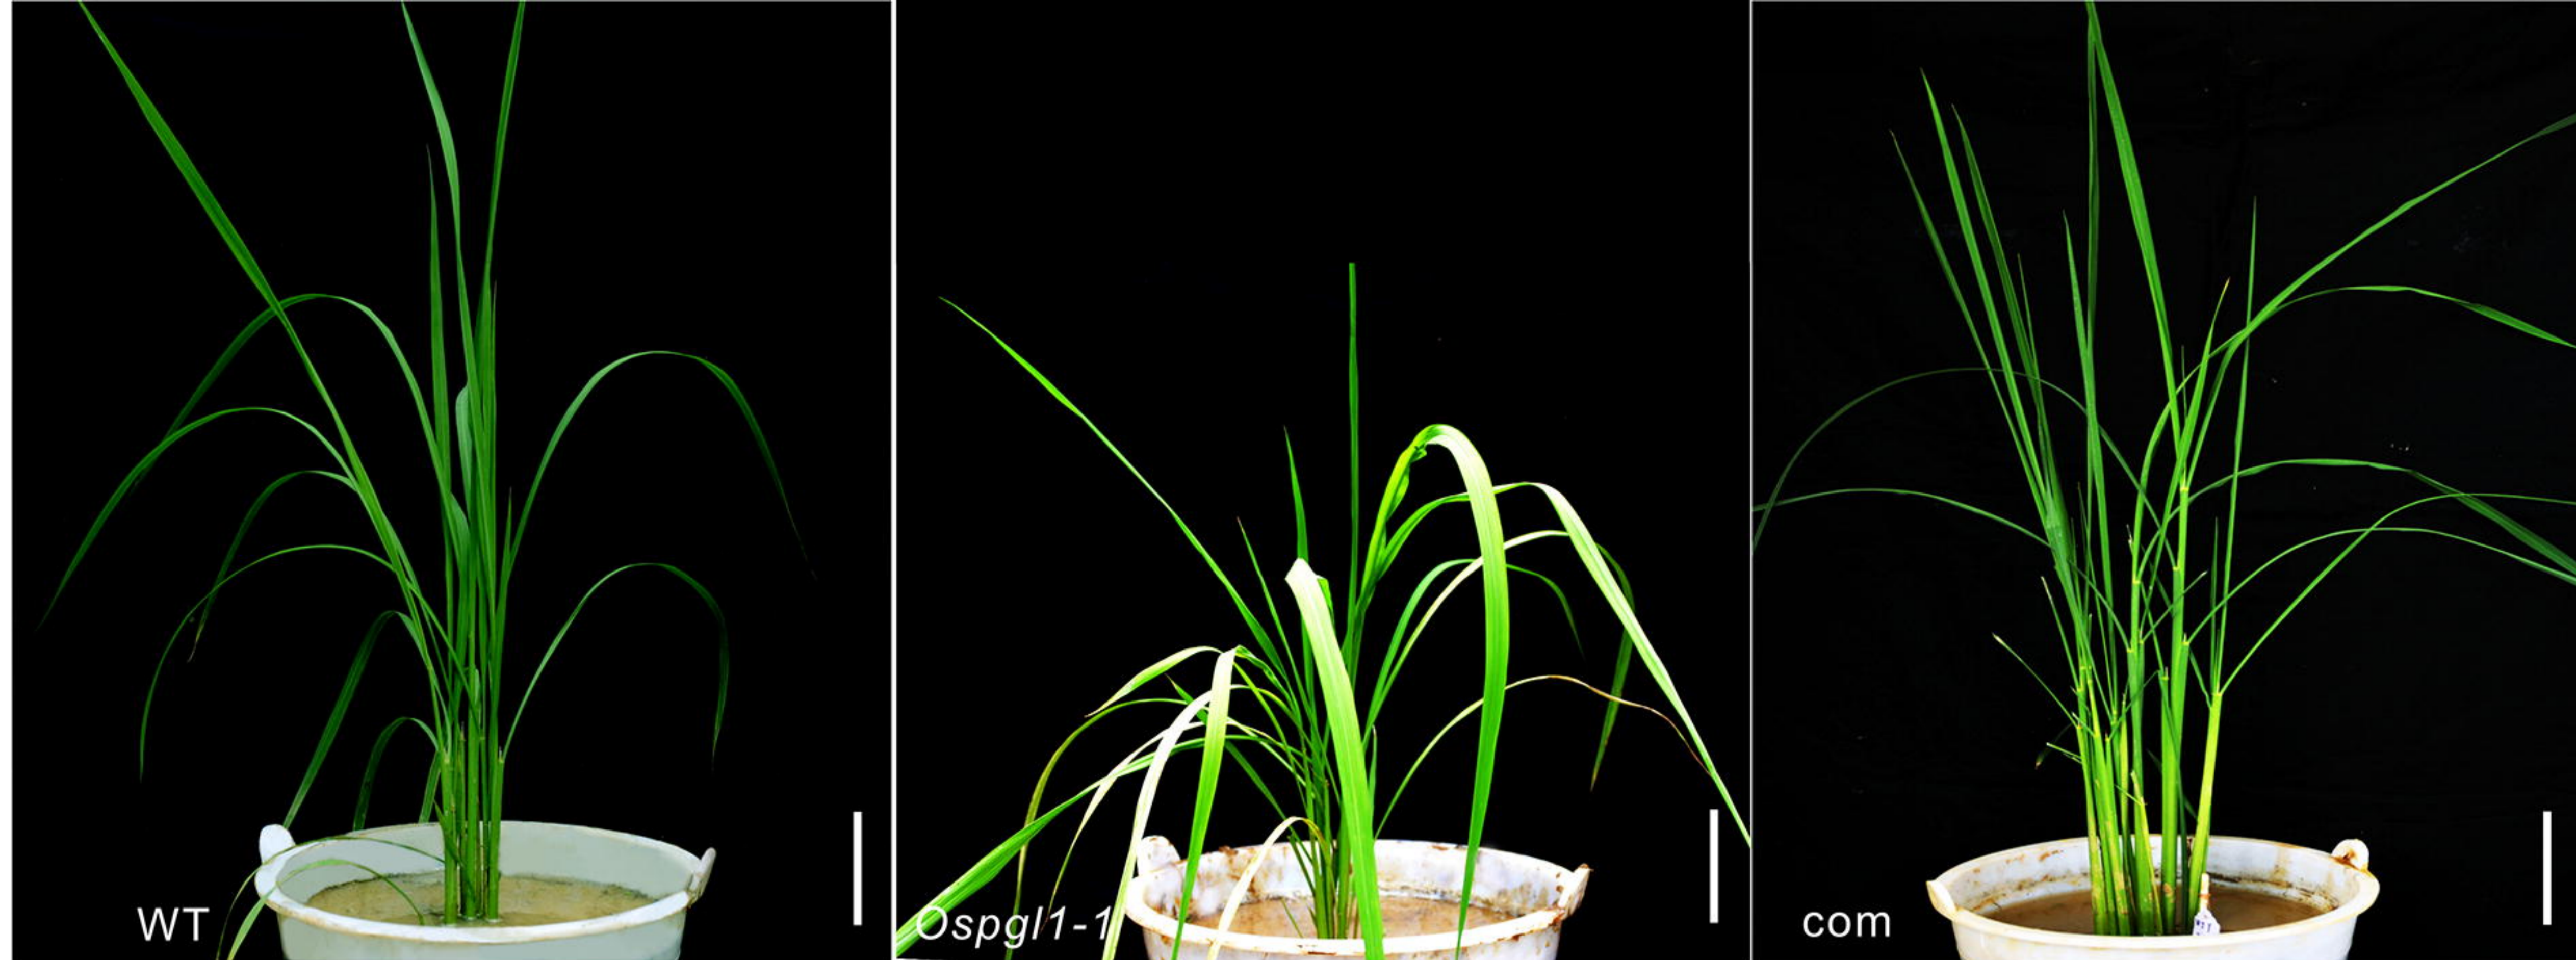

B

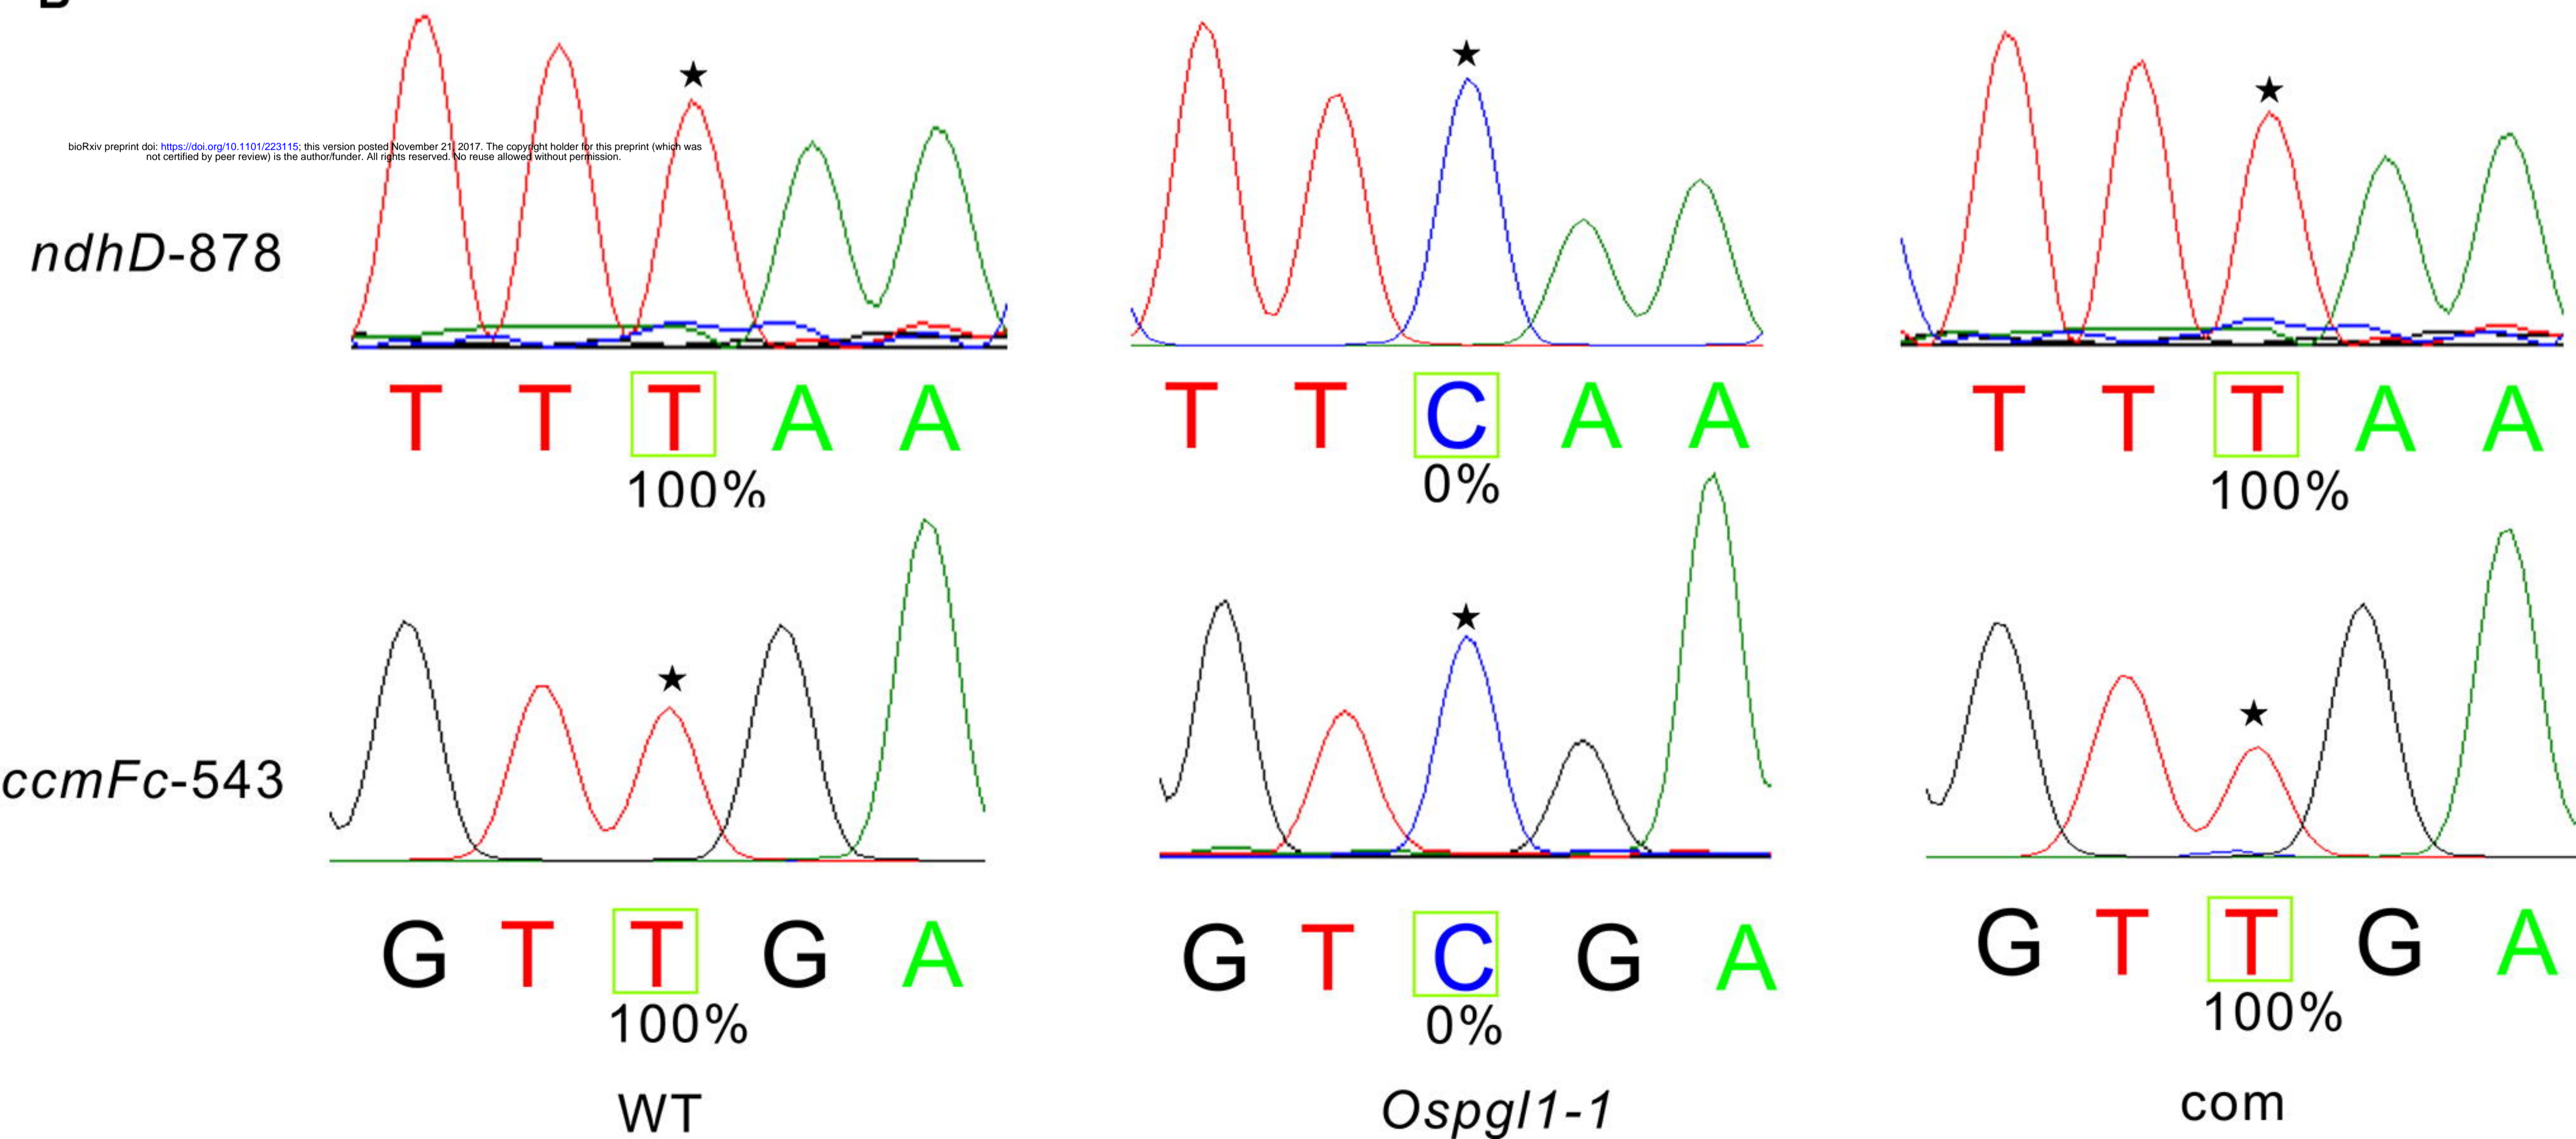

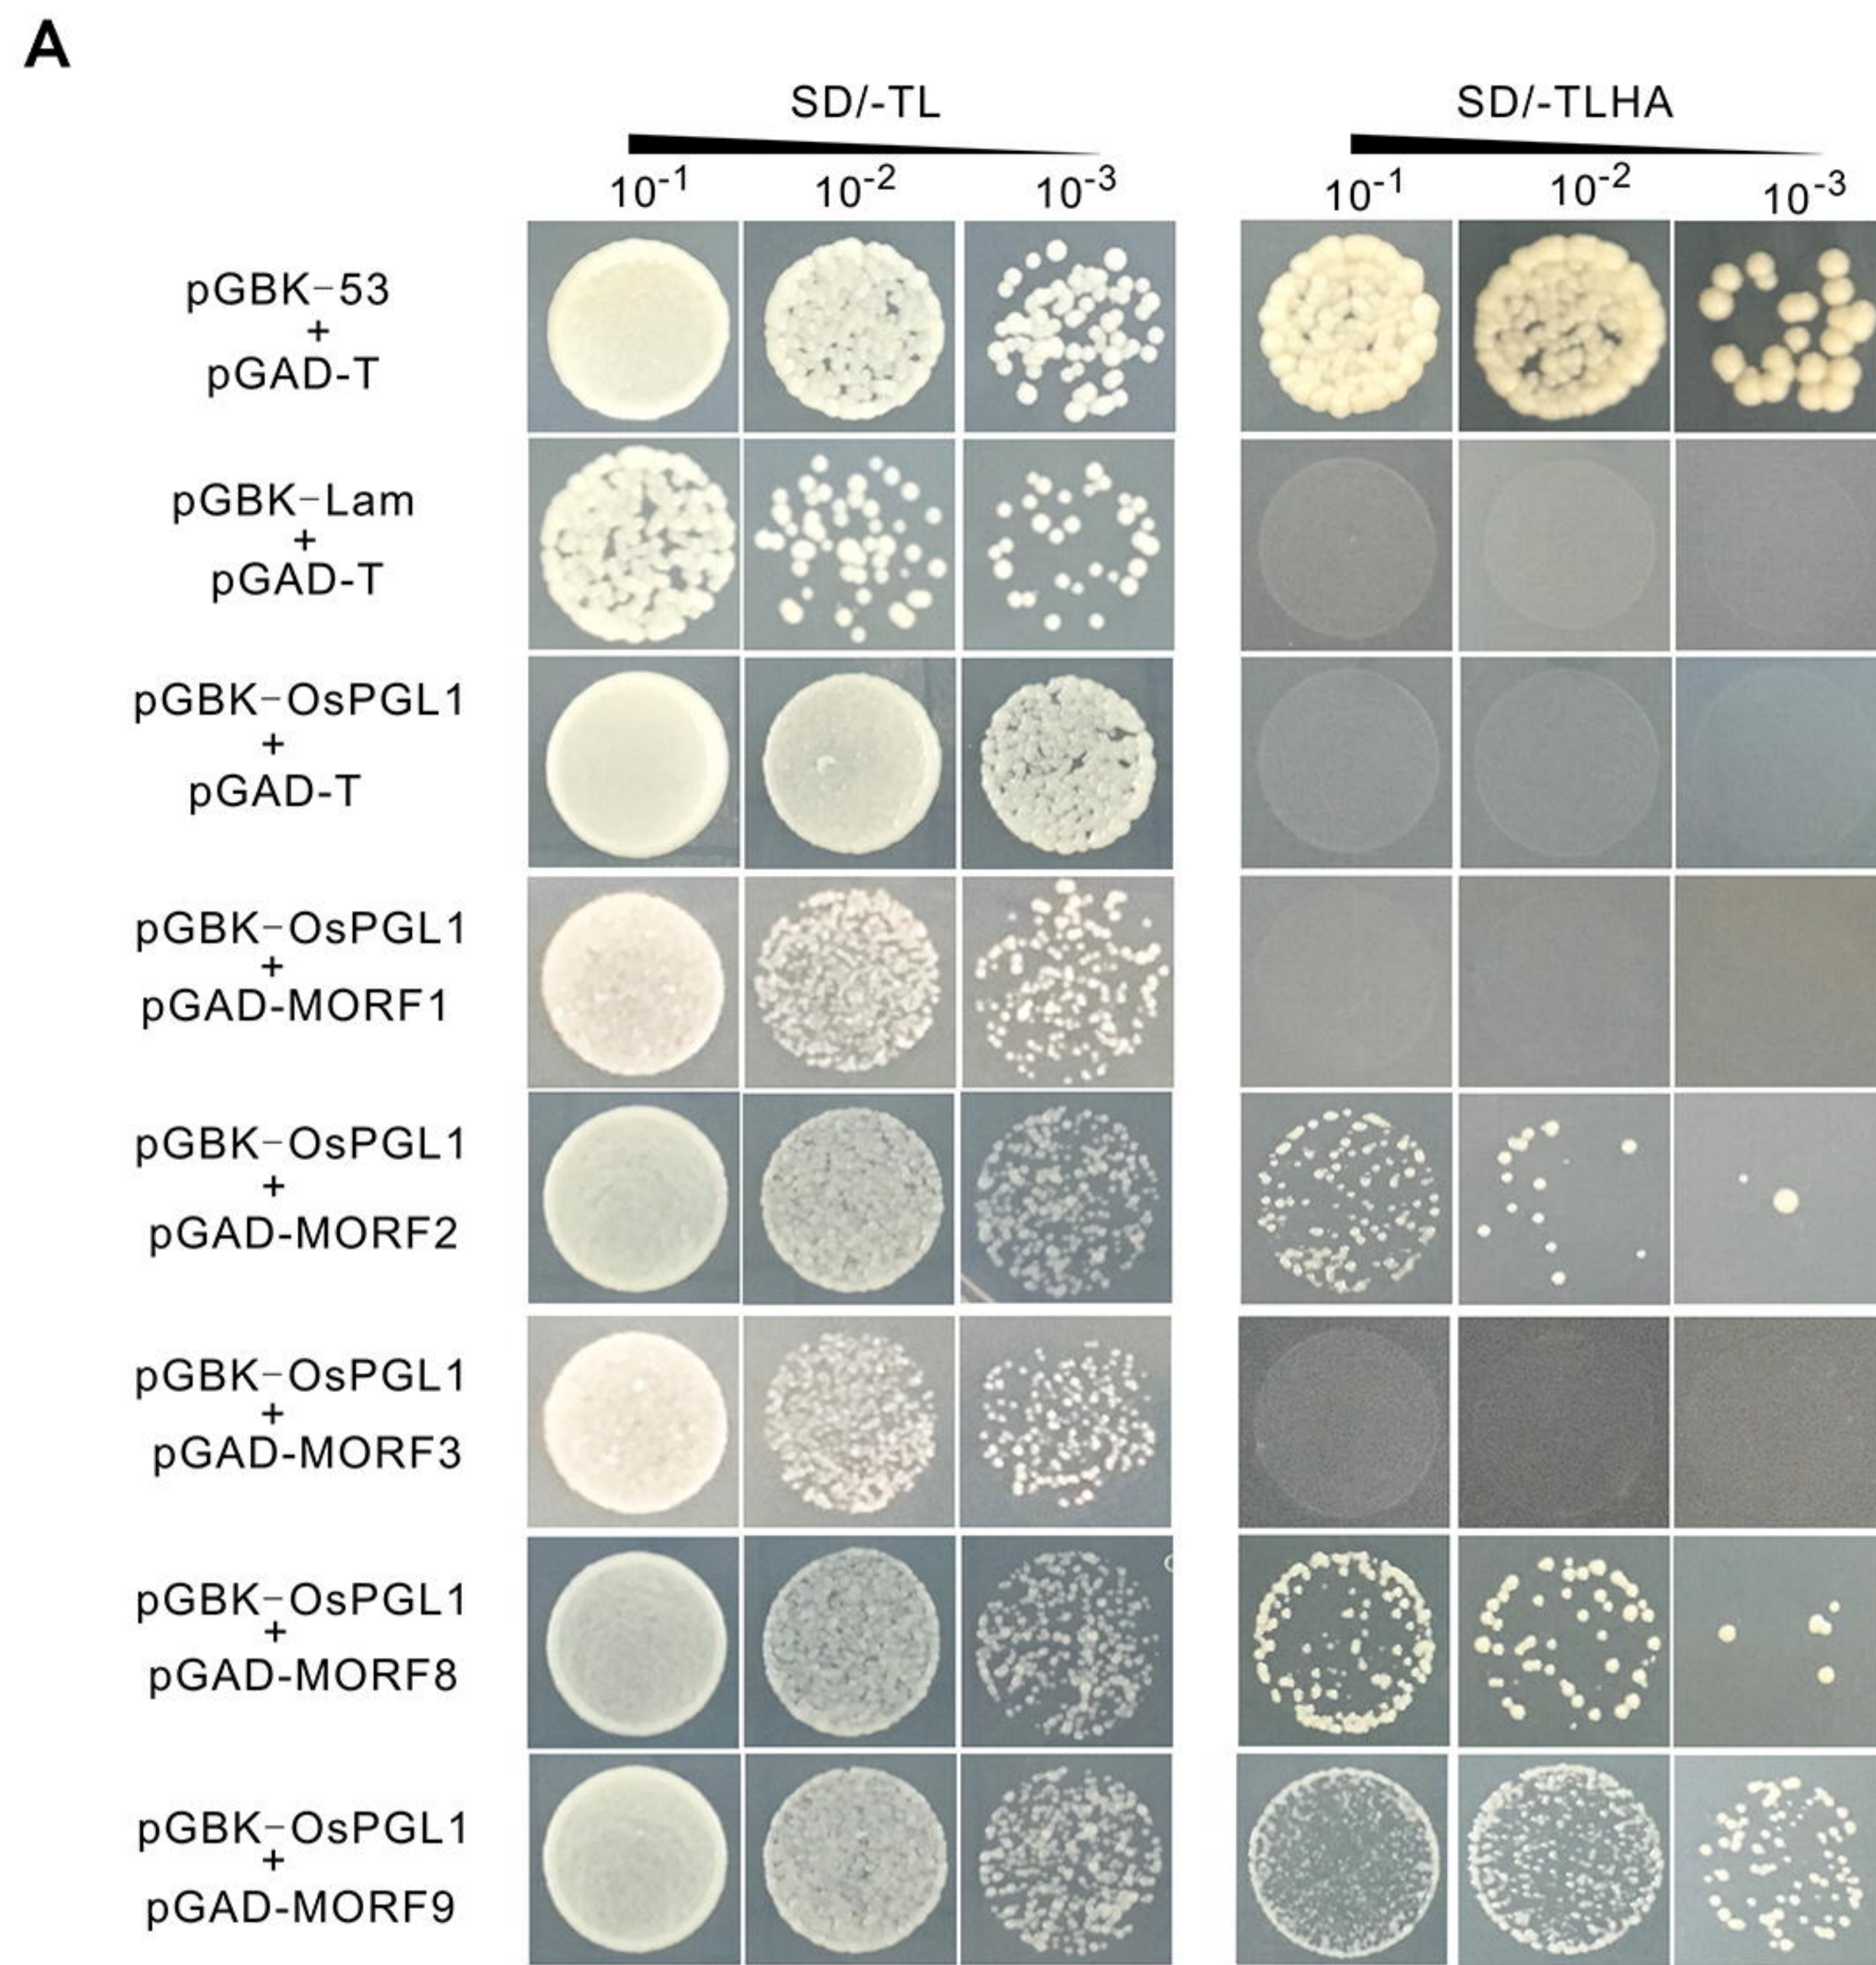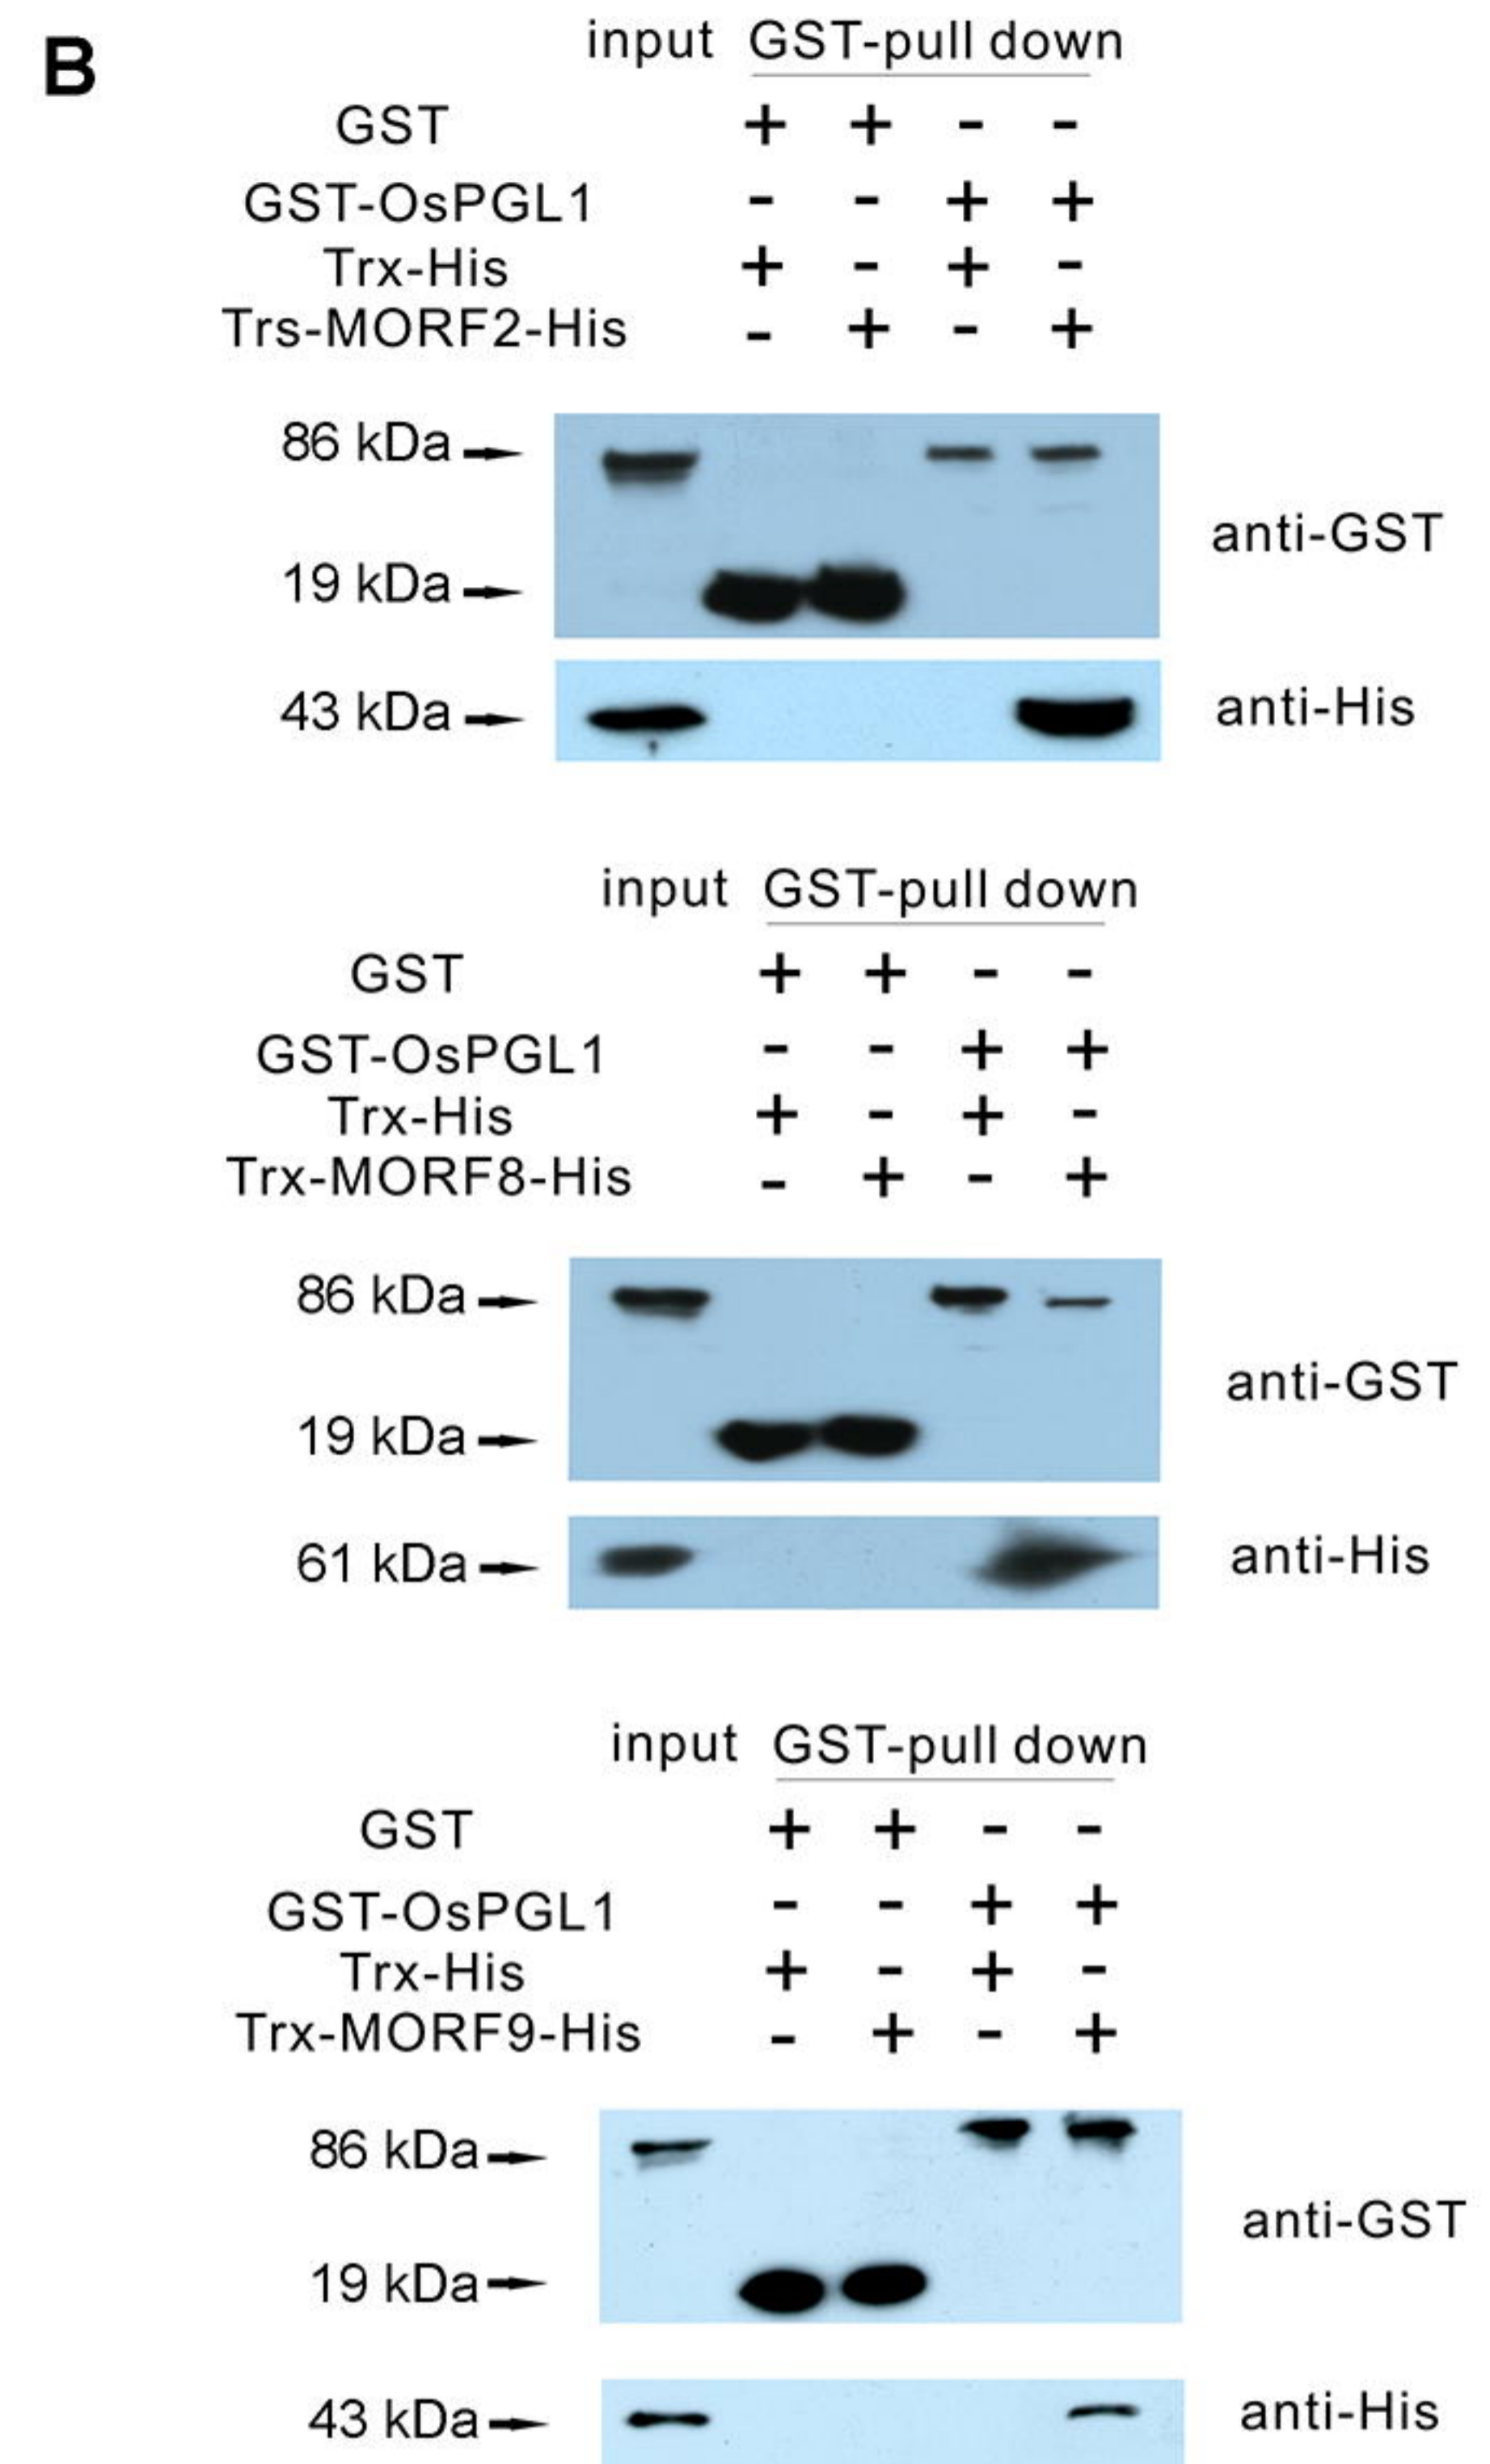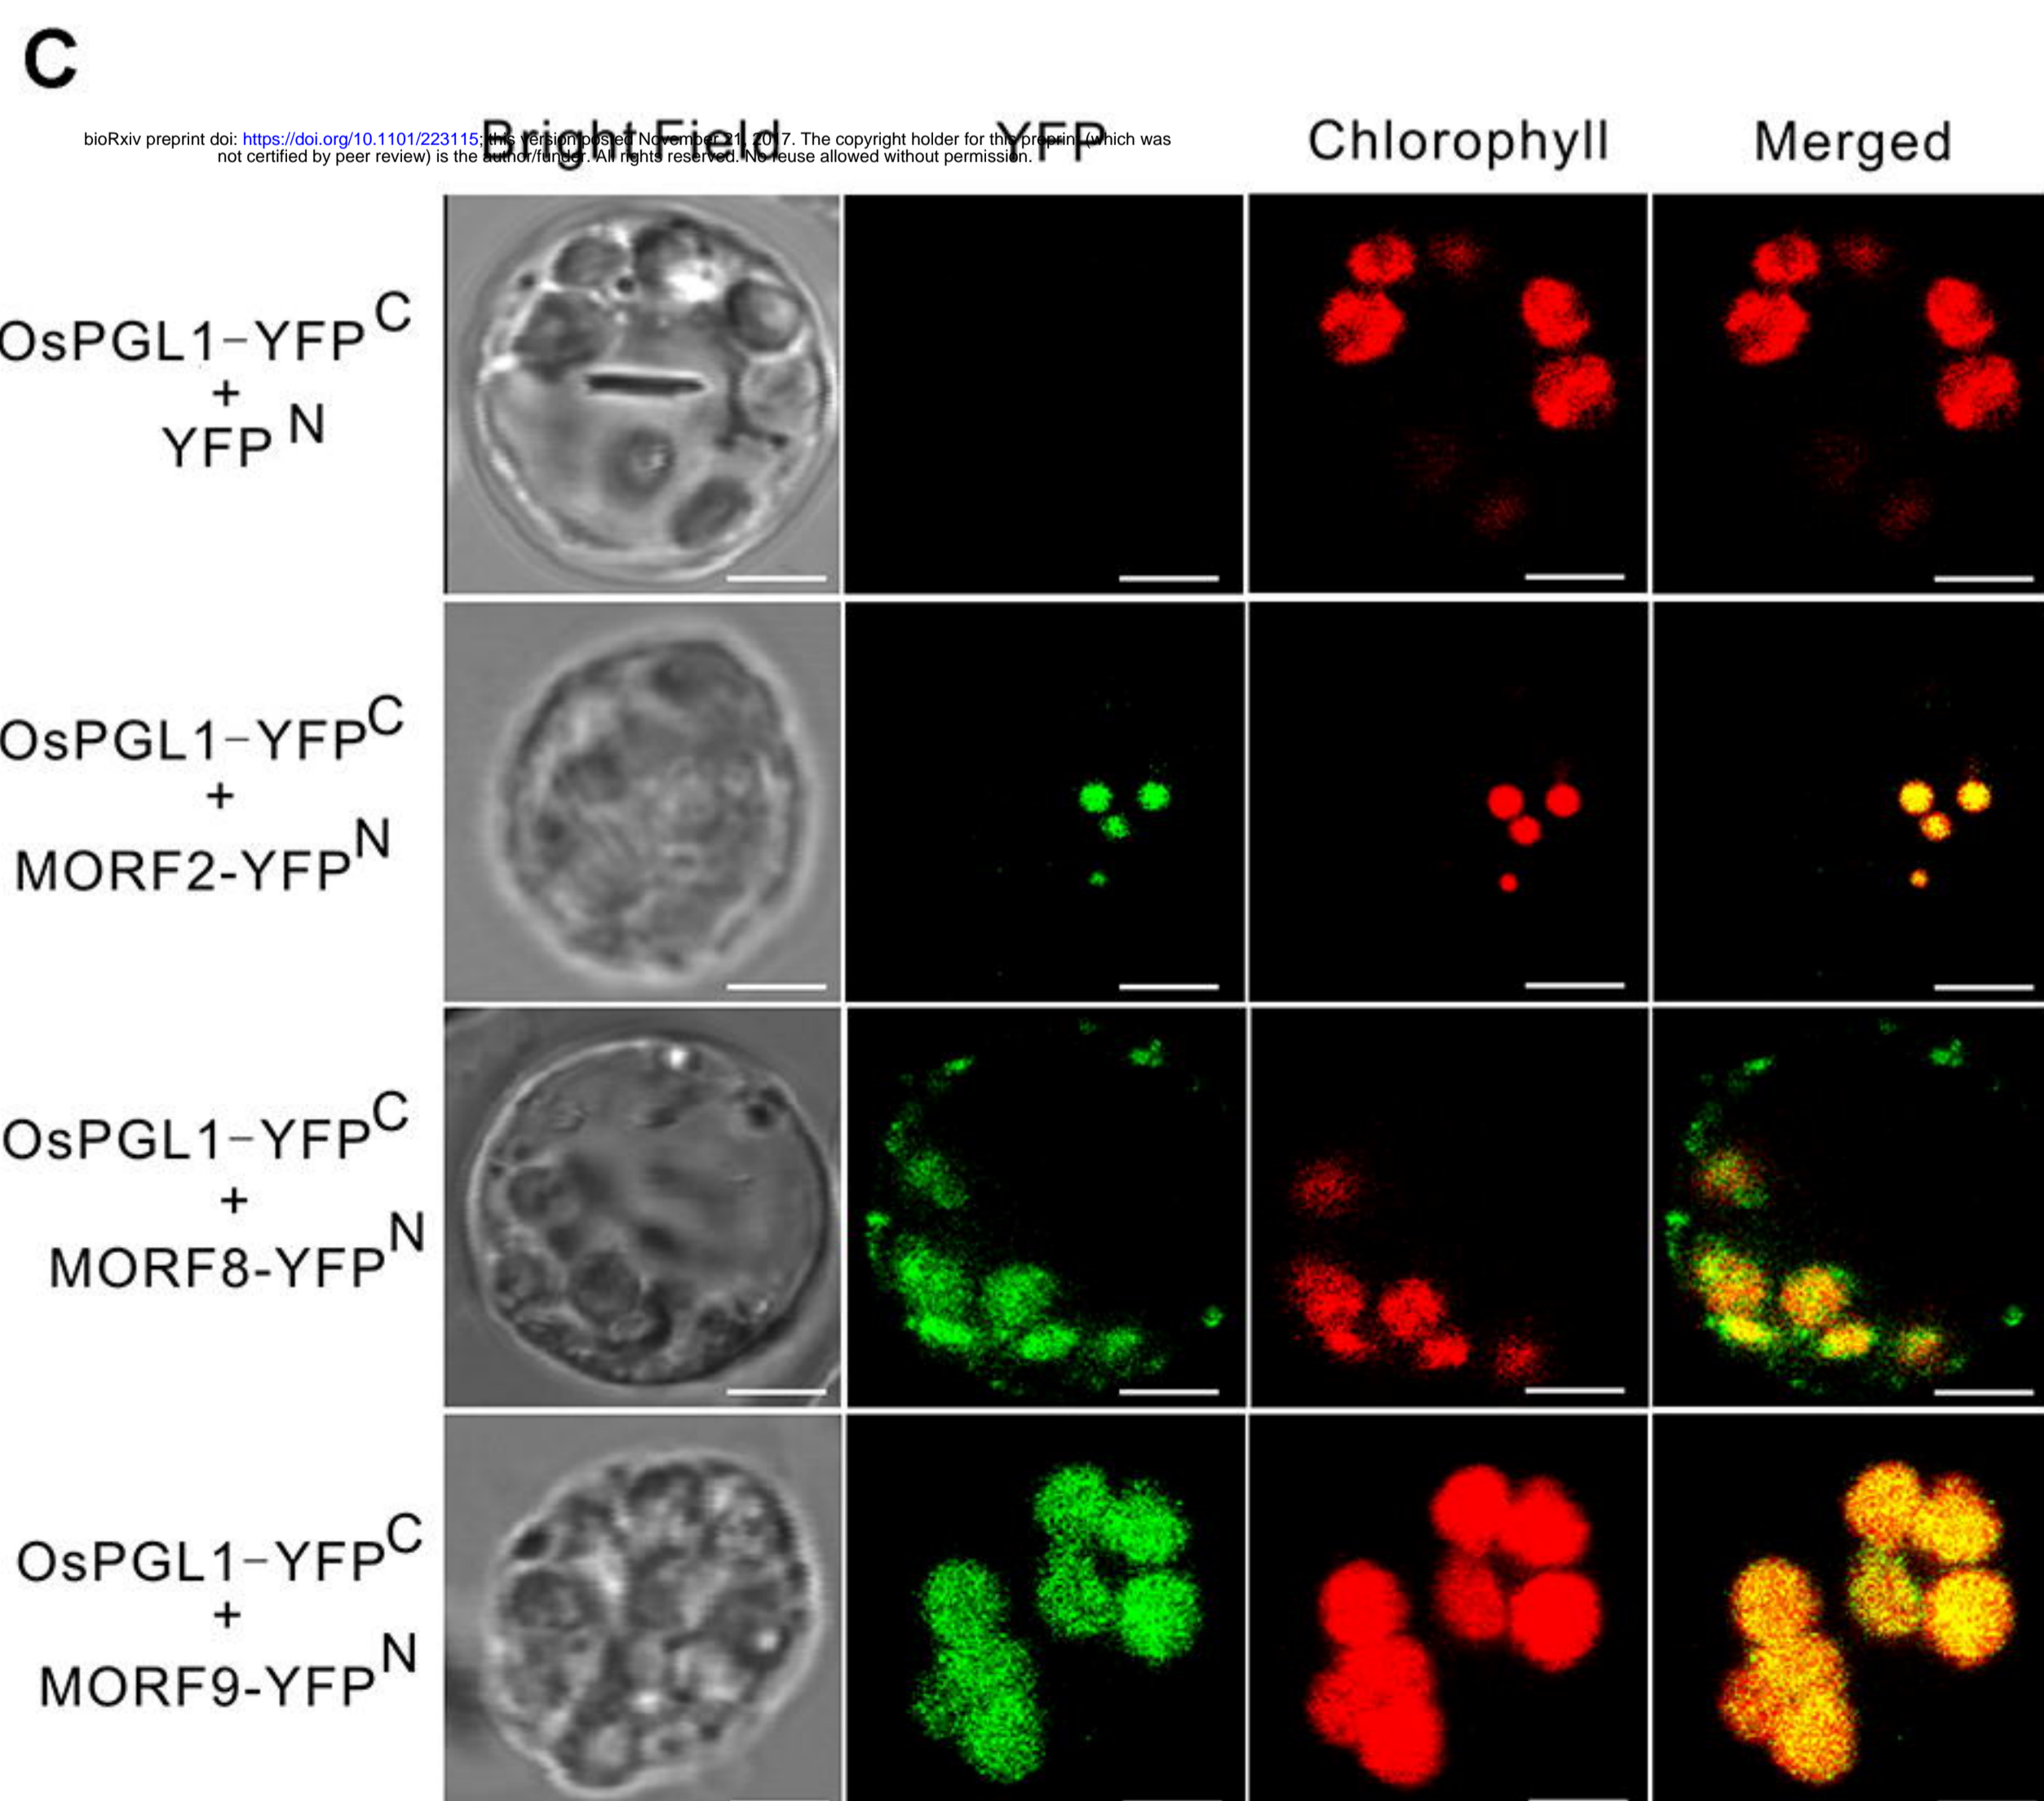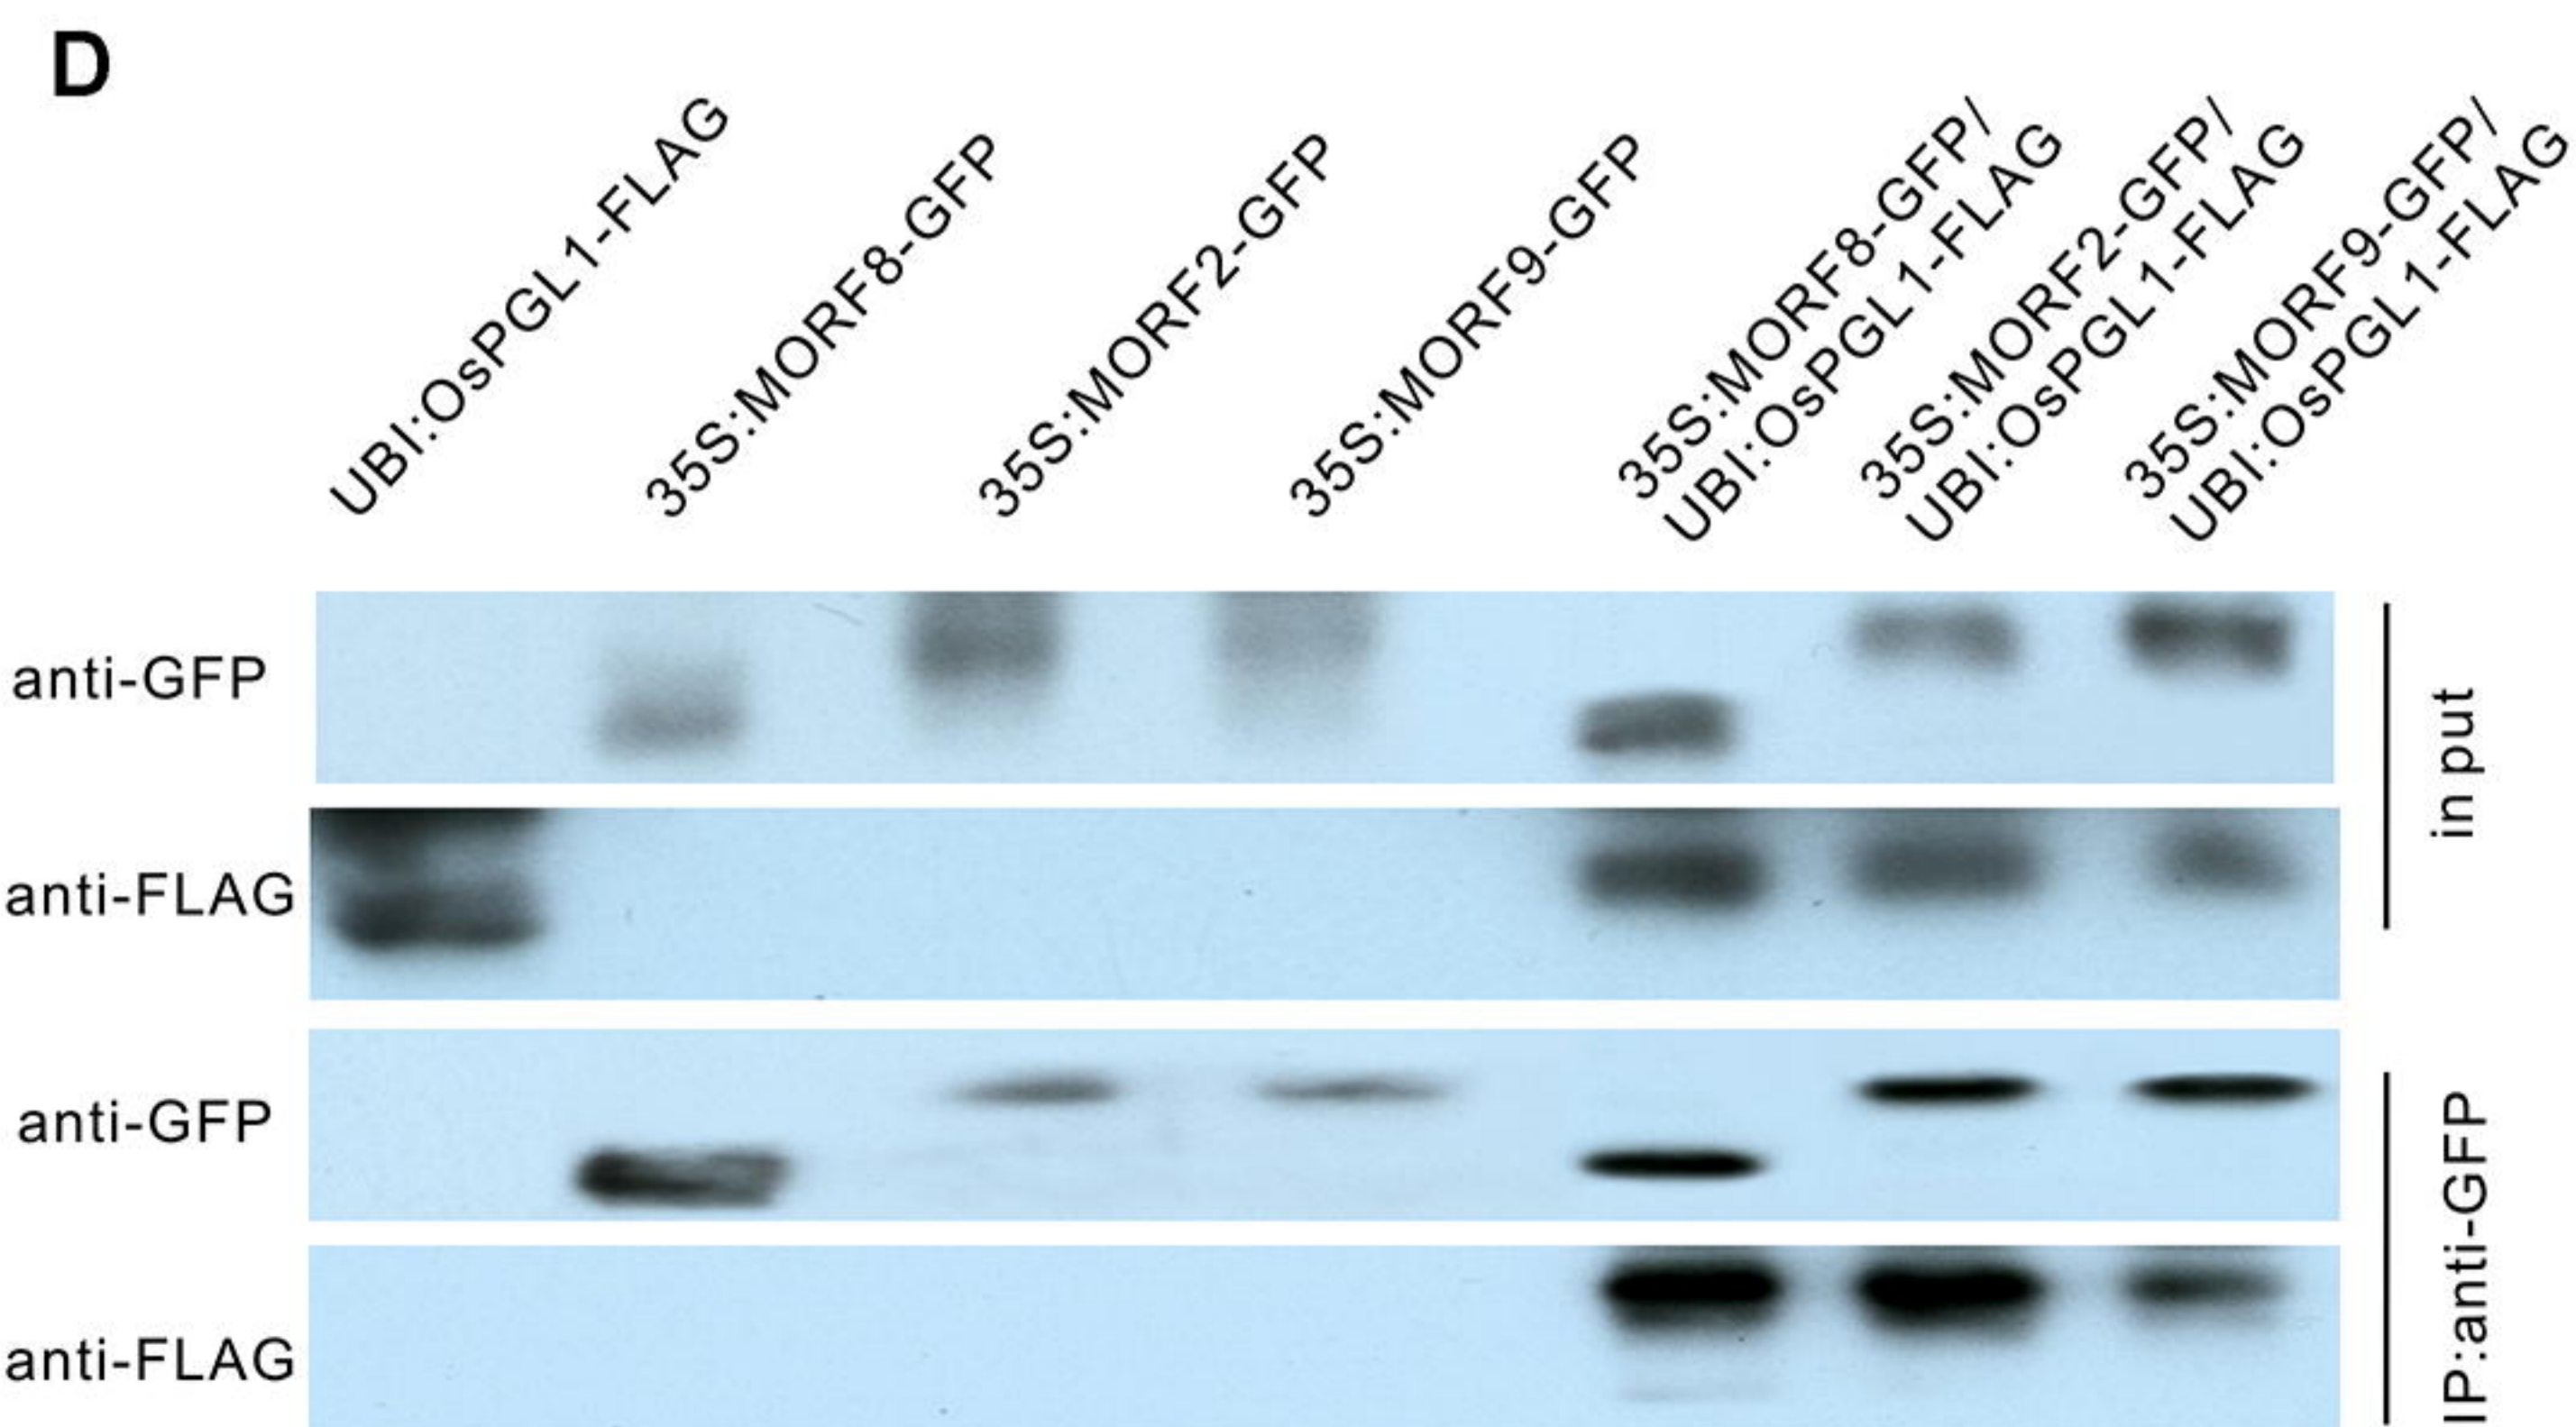



**A**

bioRxiv preprint doi: <https://doi.org/10.1101/223115>; this version posted November 21, 2017. The copyright holder for this preprint (which was not certified by peer review) is the author/funder. All rights reserved. No reuse allowed without permission.

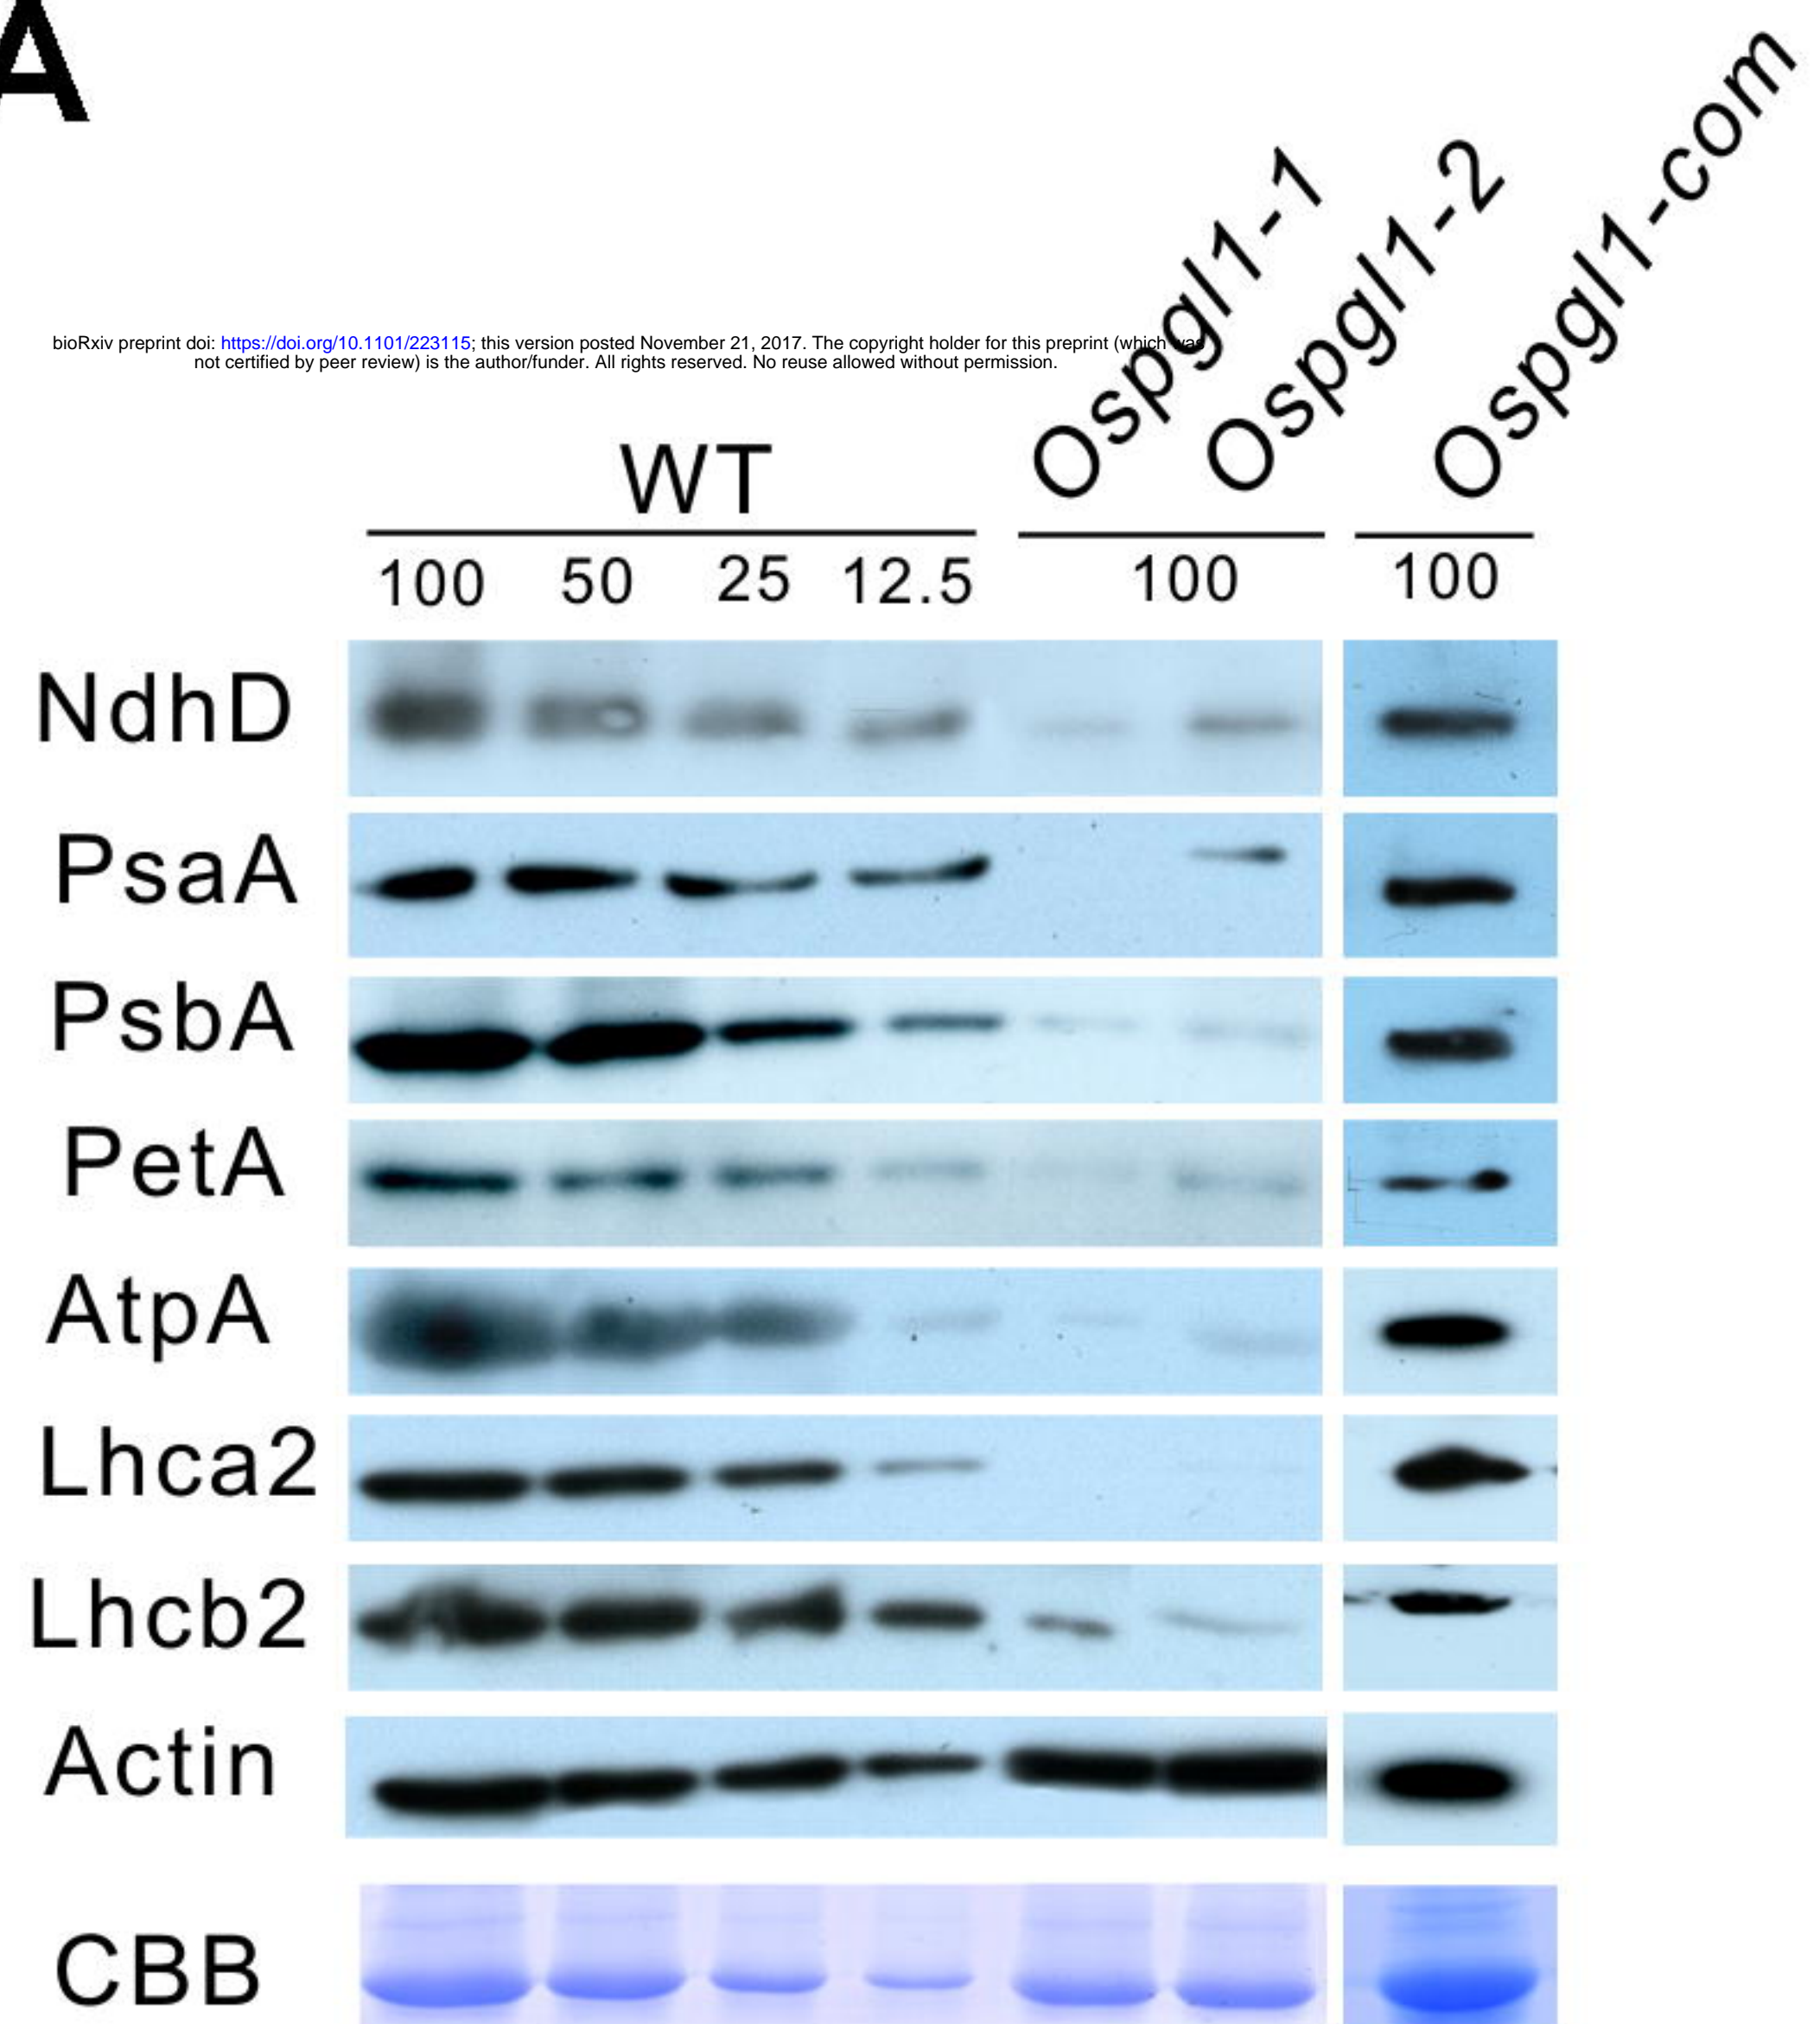**B**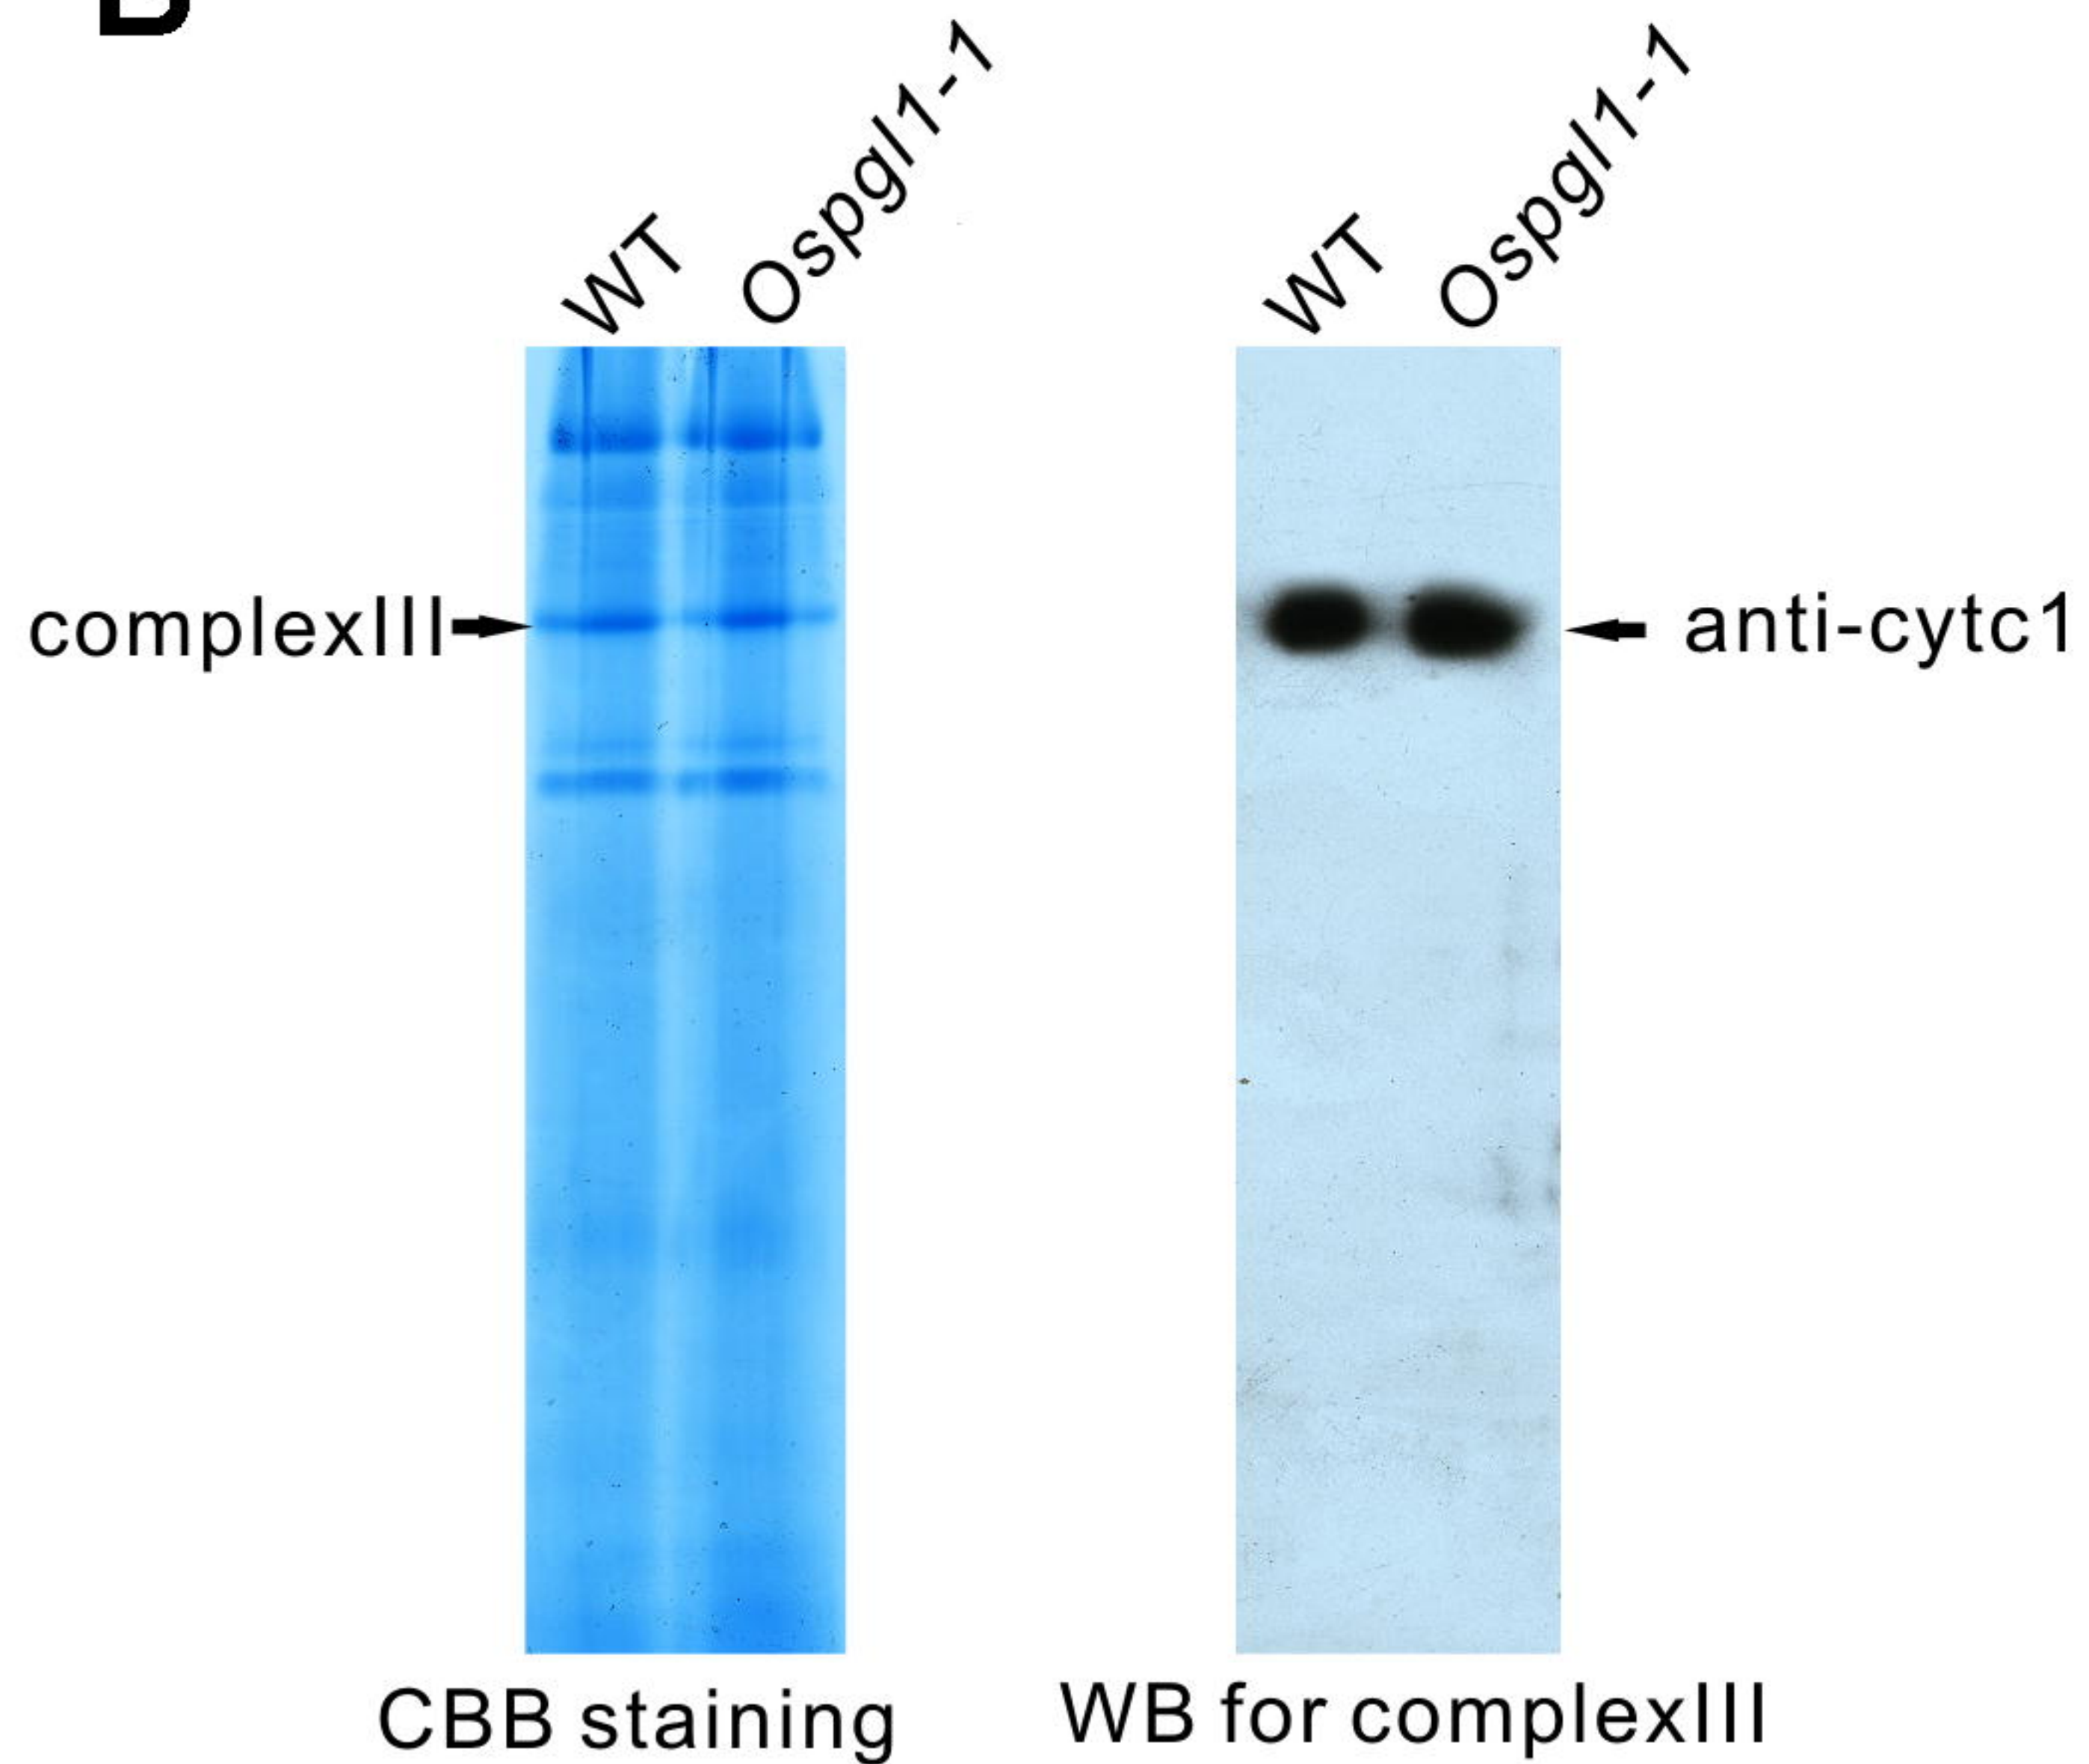

**A**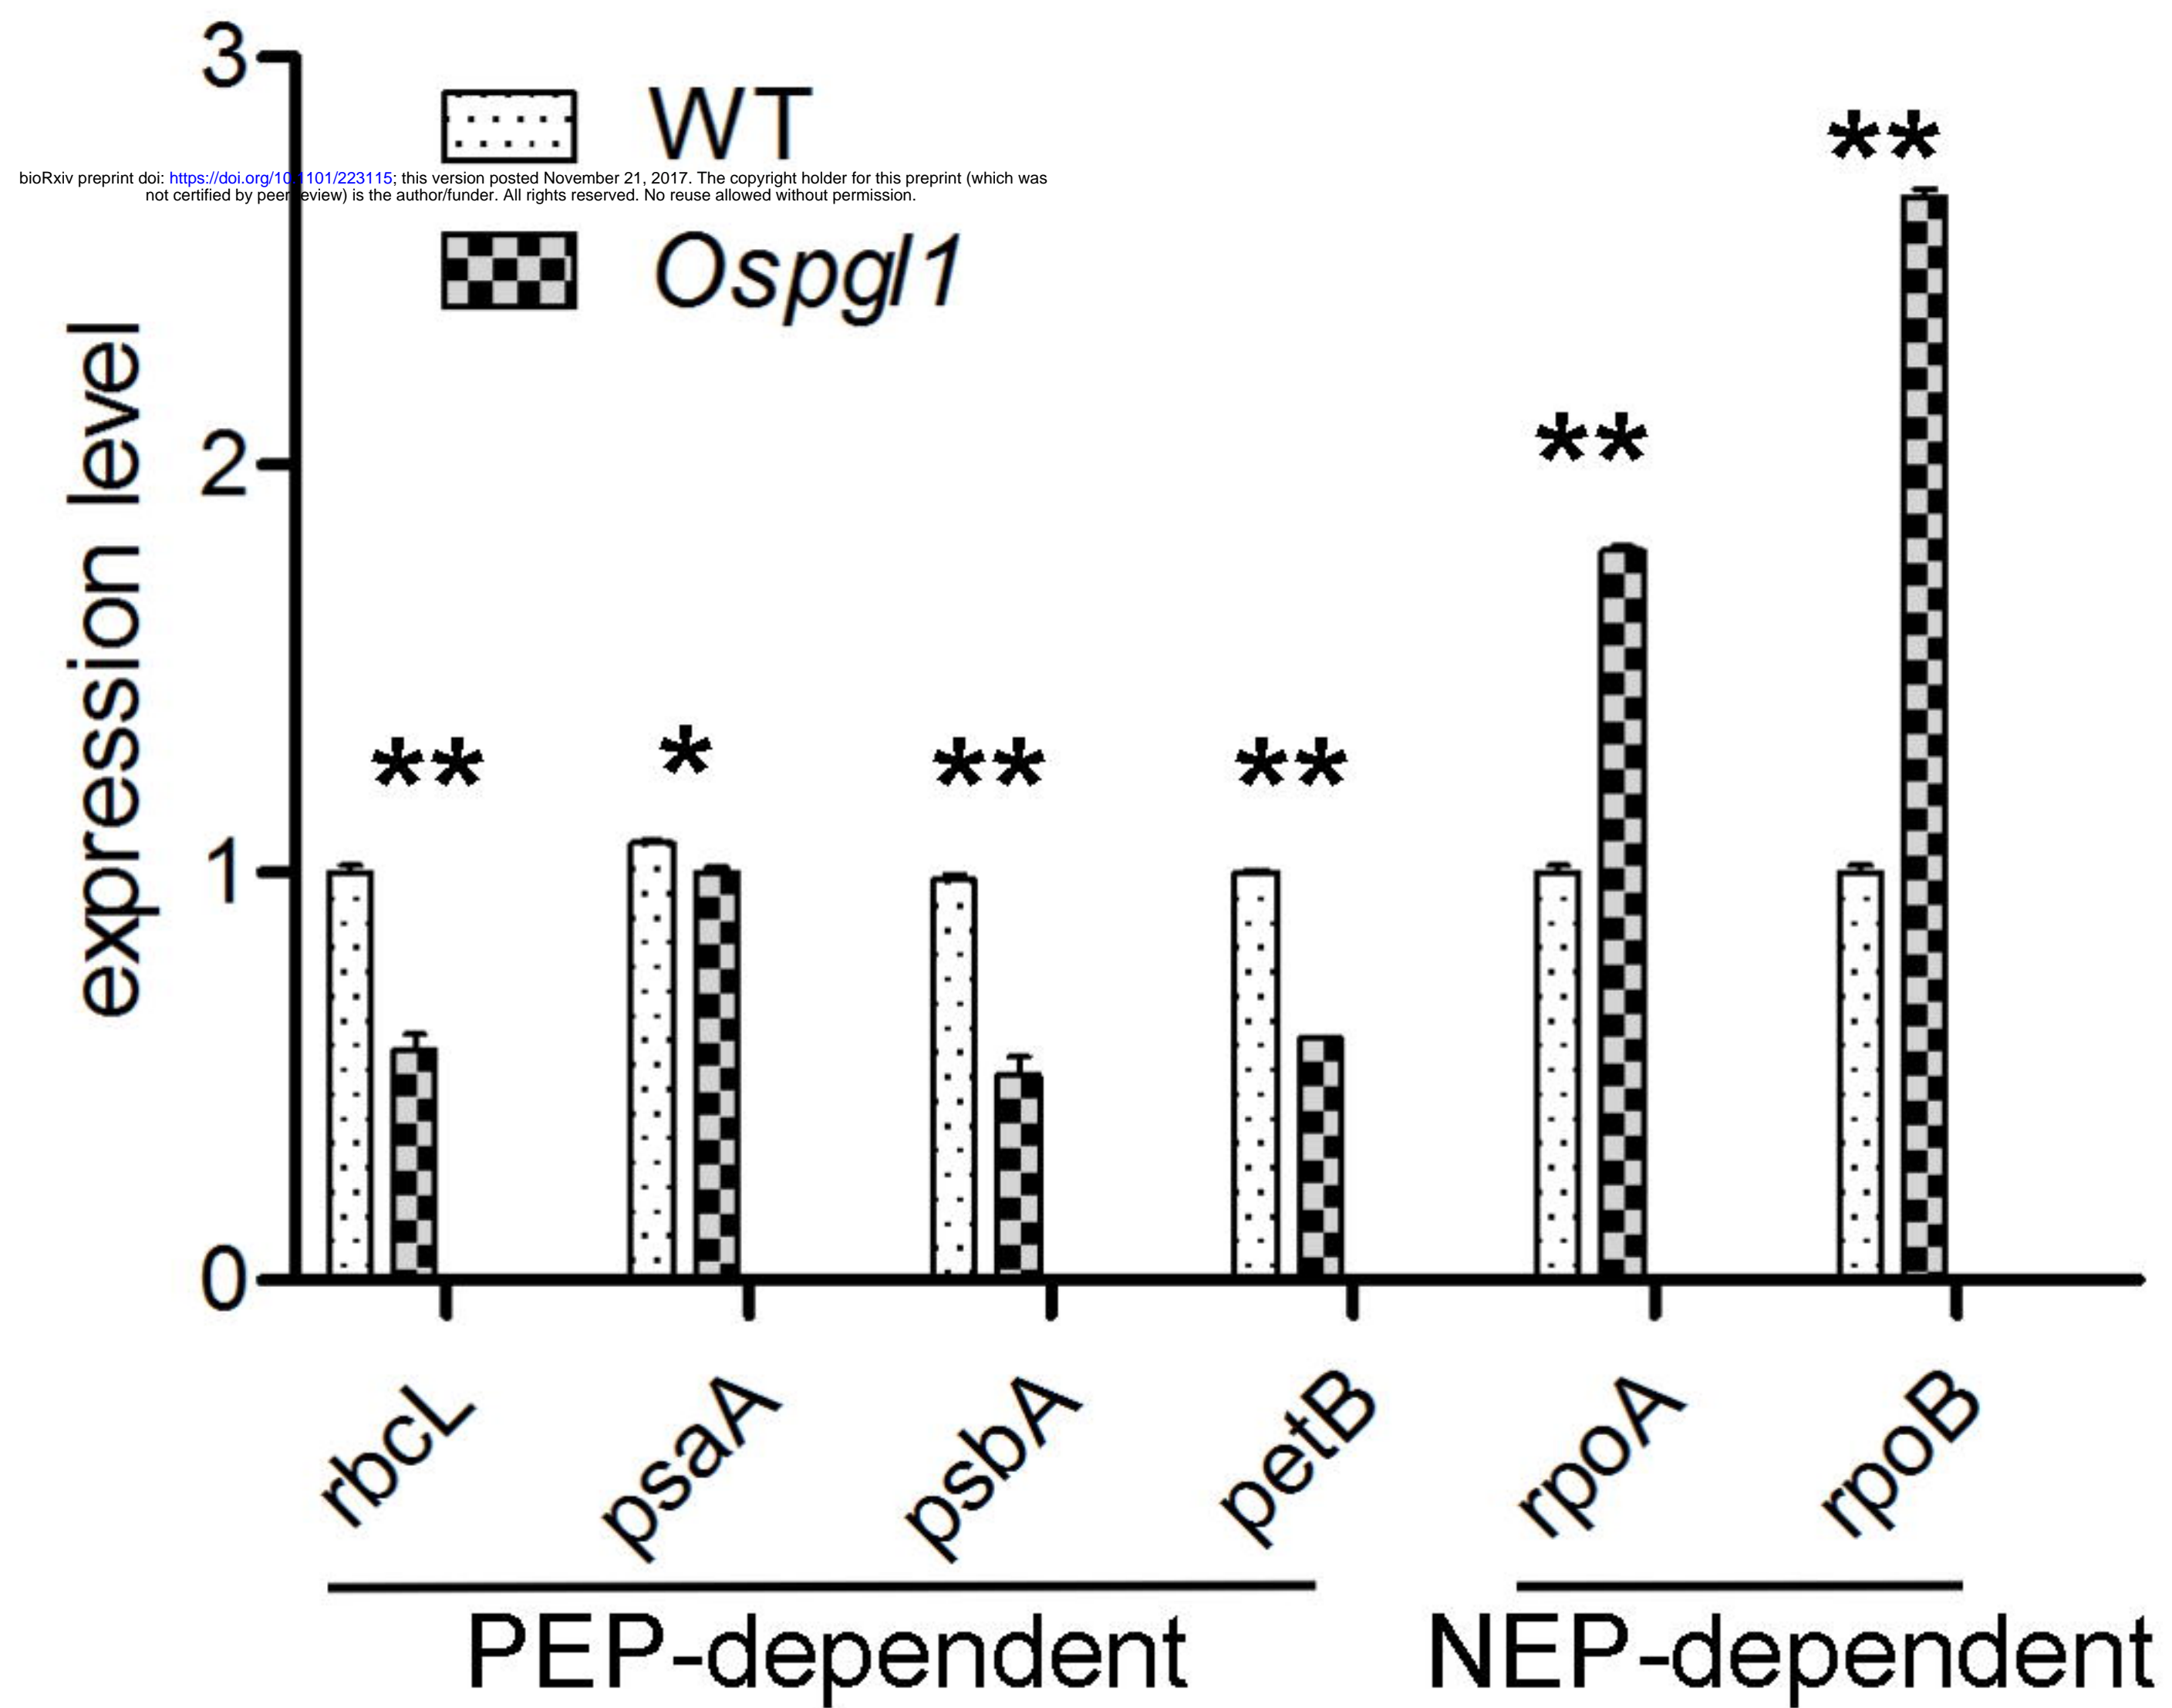**B**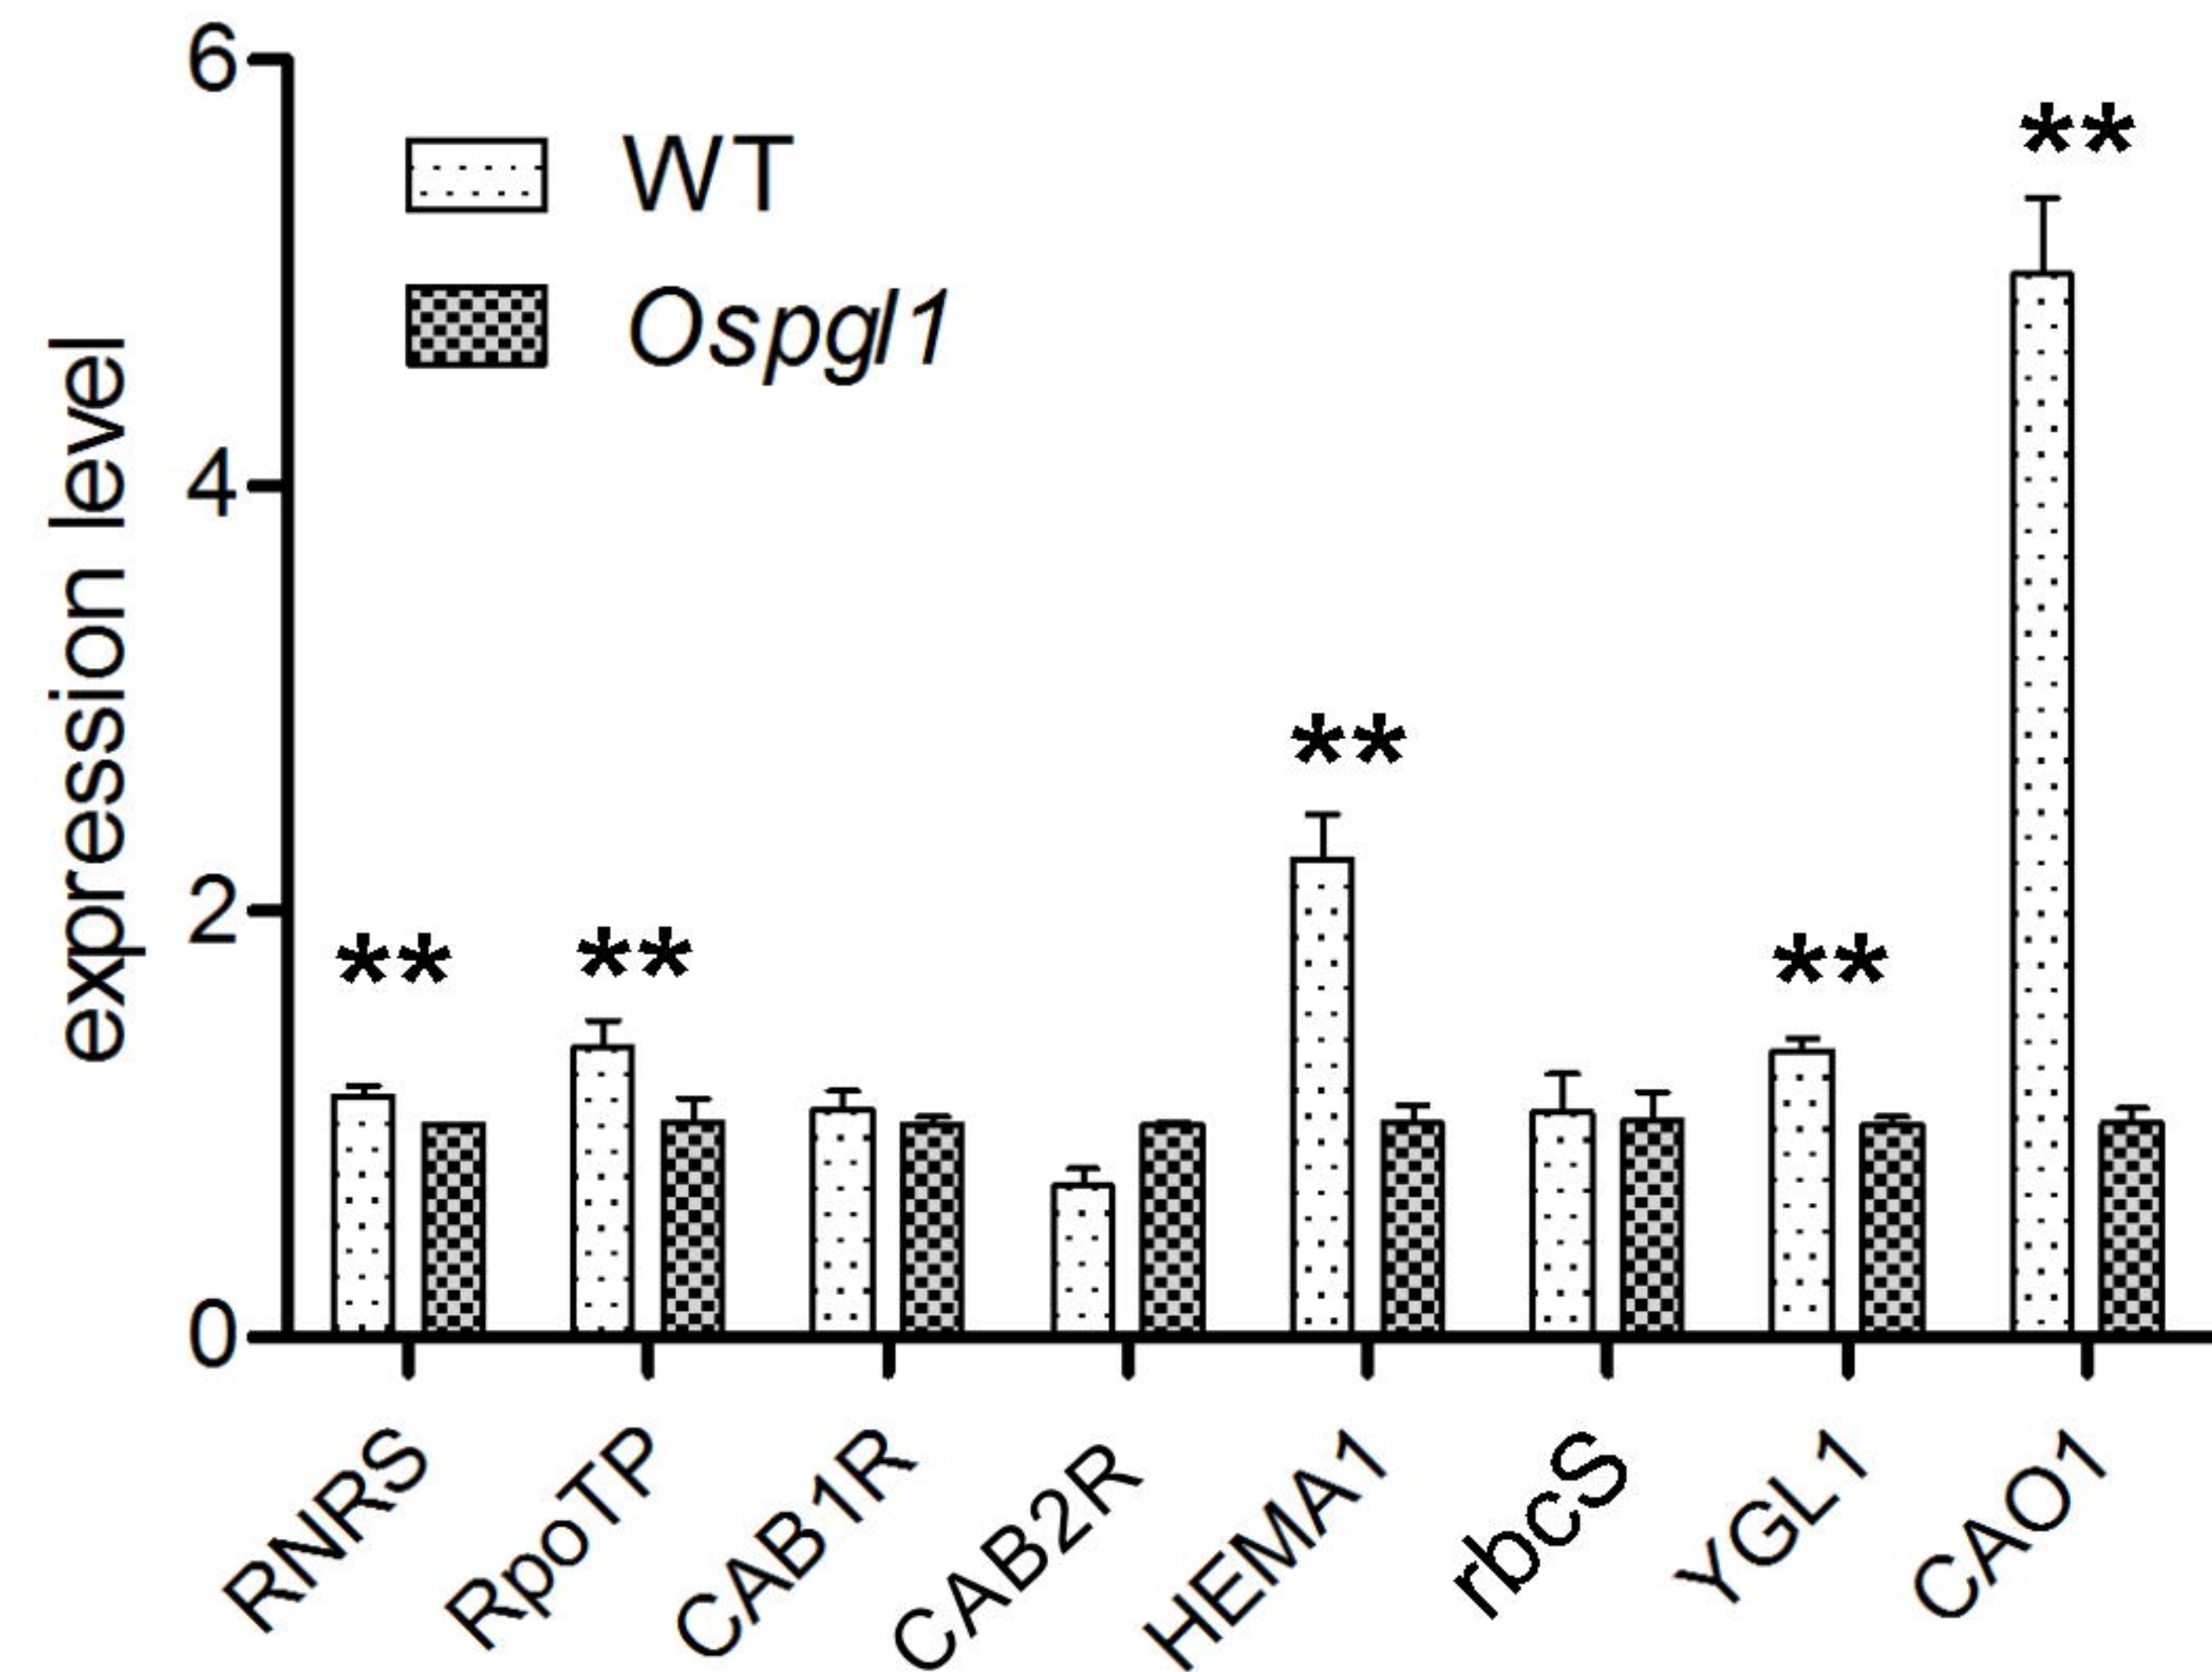

**A**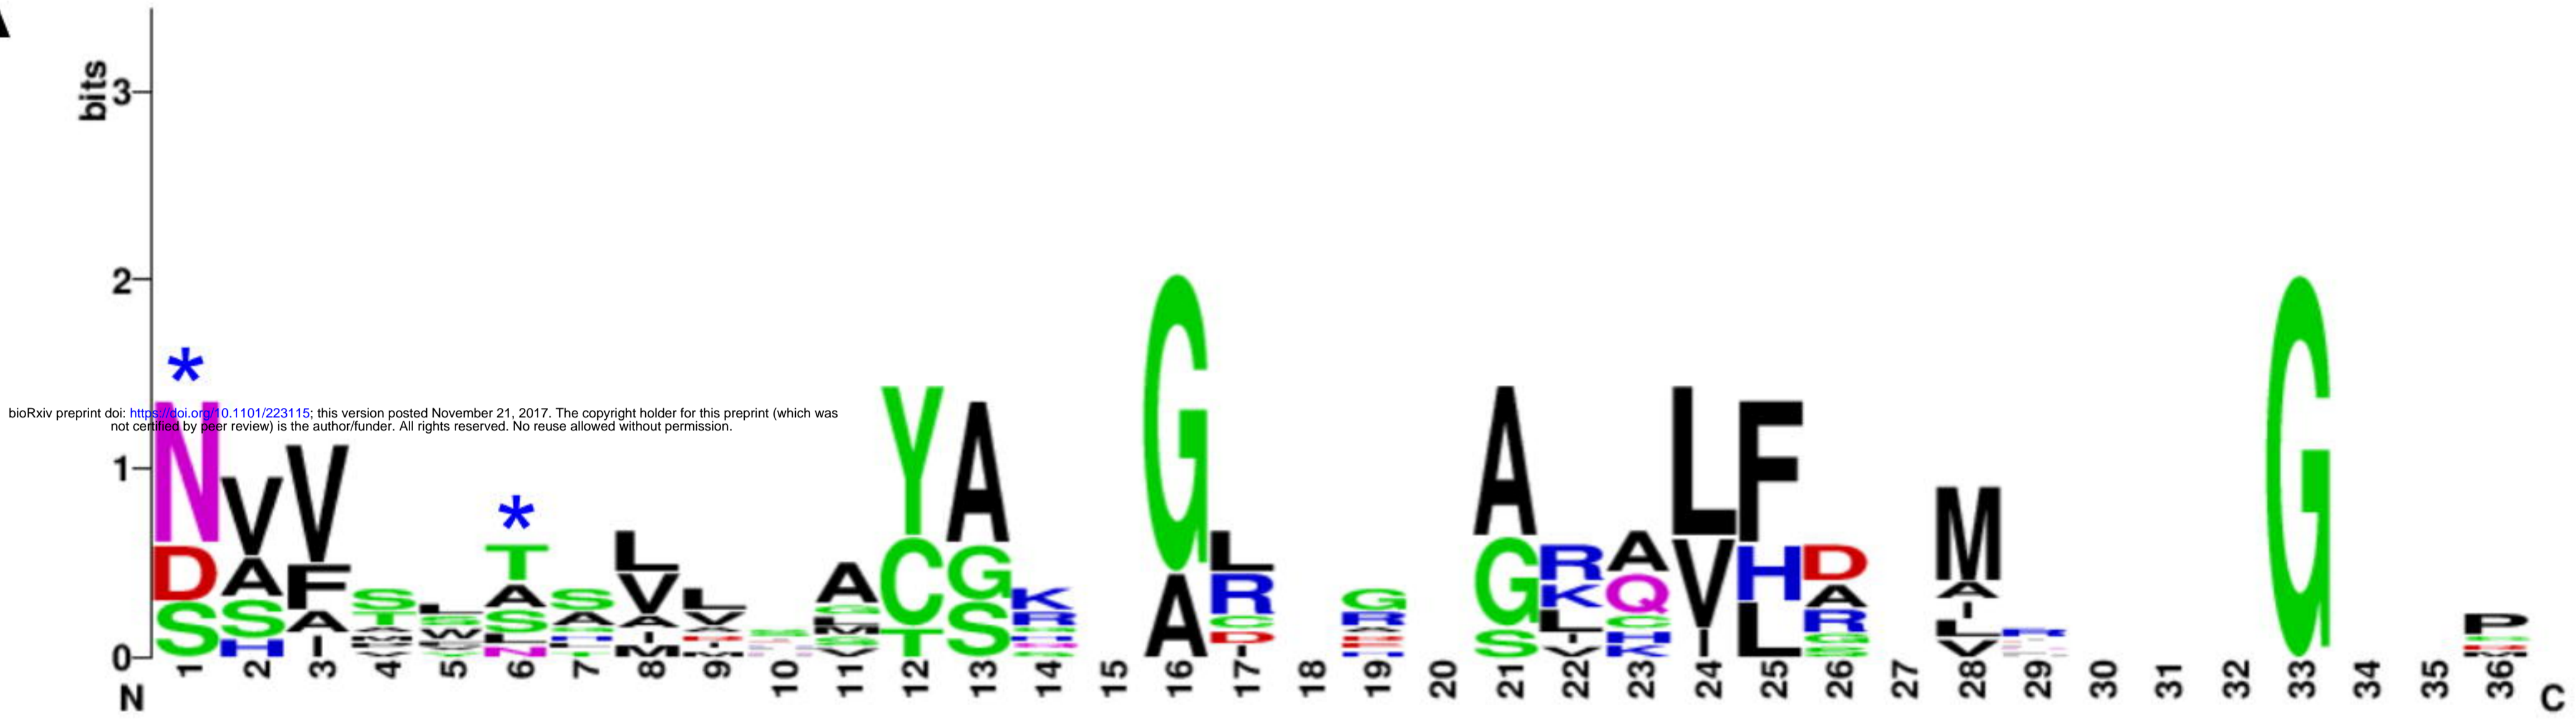**B**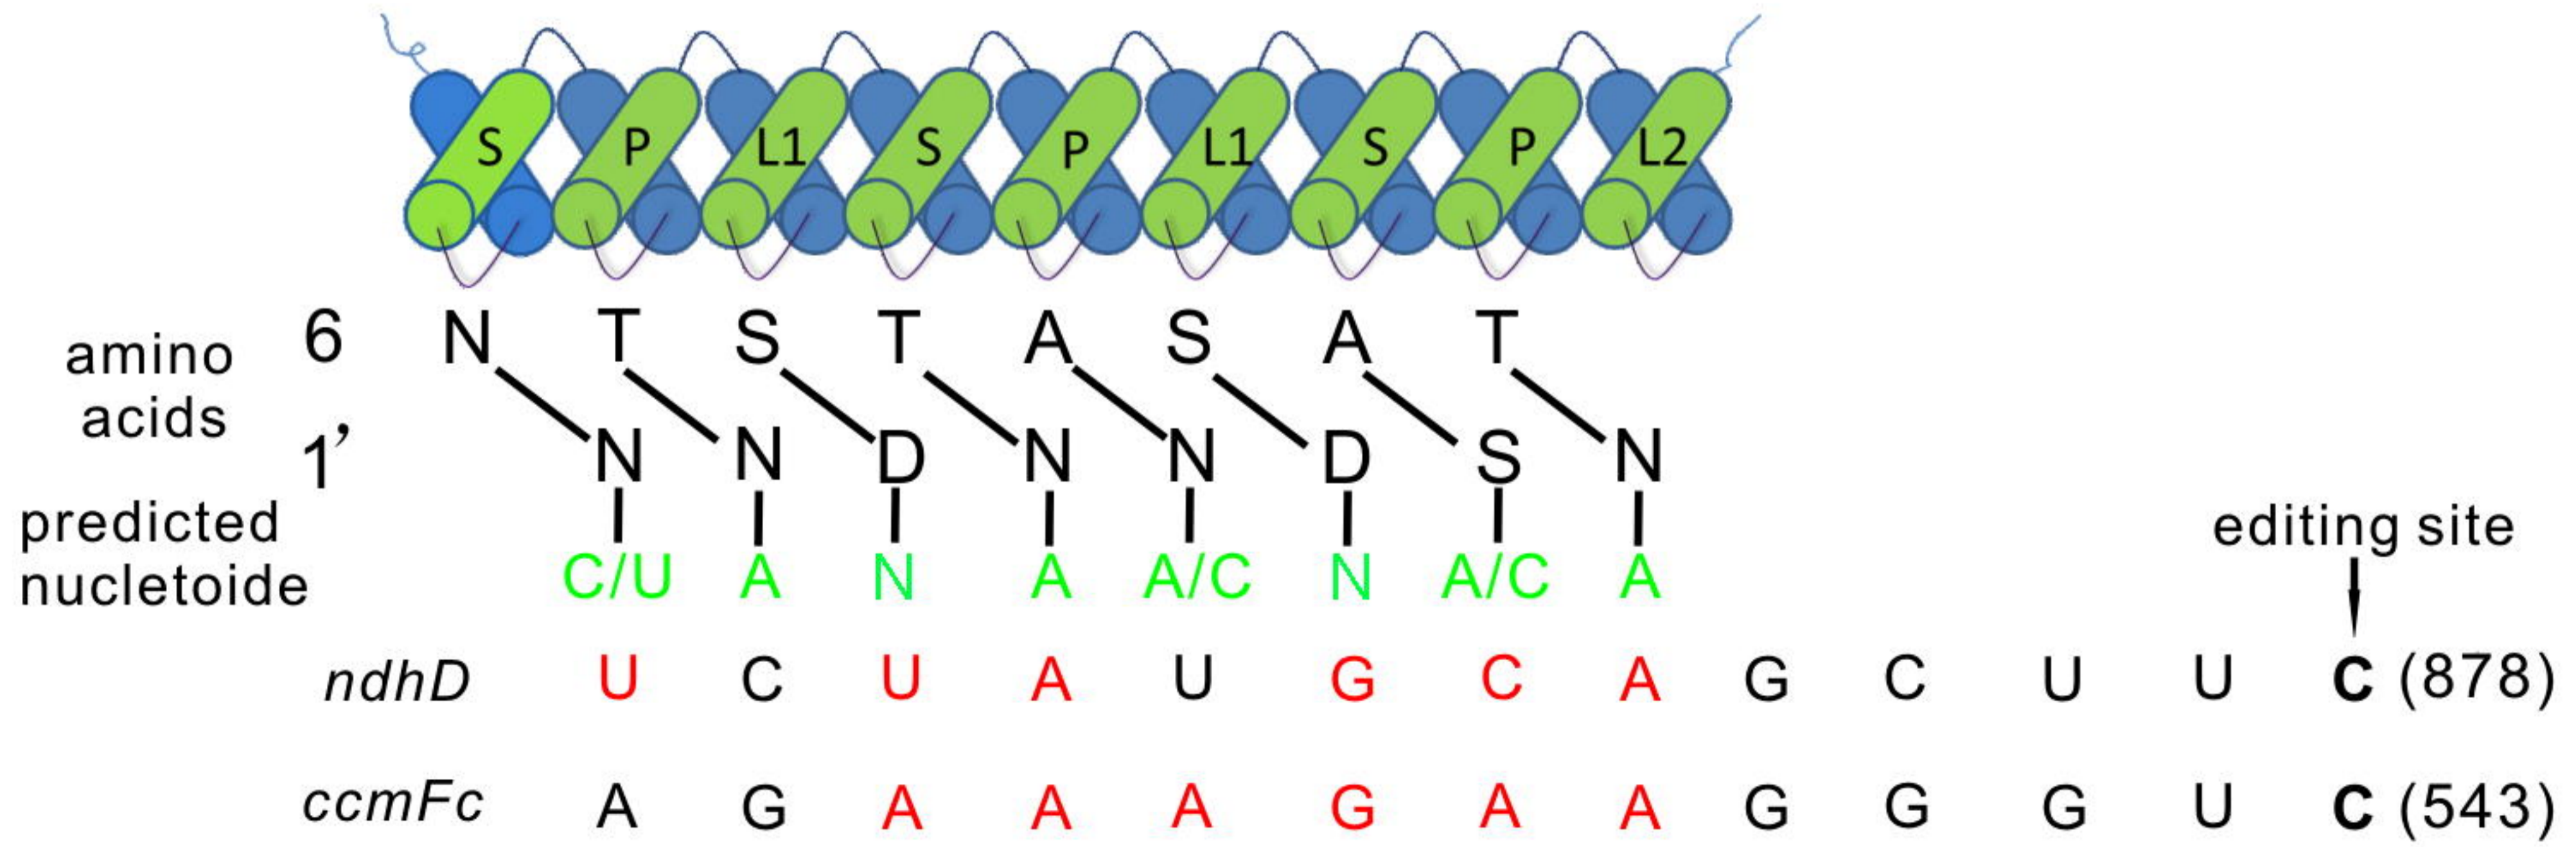

Source: http://biorxiv.org/content/10.1101/223115v1.full.pdf
